# Supplementary material for: KDM5B drives acute liver injury by impairing autophagy and activating cGAS-STING signaling via binding to ATG16L1
Source: Research Square preprint supplement (doi:10.21203/rs.3.rs-7430149/v1), 2025-09-12
Supplement: Supplementary file 1 [file 954eaa62afa83a69b9a8eb6a.xlsx]

## Sheet: Sheet1
geneID	gene_name	WT1_count	WT-2_count	WT-3_count	CCl4-1	CCl4-2	CCl4-3	log2FoldChange	pvalue	padj	regulated	chr	start	end	strand	gene_biotype	gene_description	KO_annot	KEGG_pathway	GO_term	TF Family
ENSMUSG00000030934	Oat	3933	2628	2981	45.3683	31.8644	33.4393	-3.43384	4.61561e-79	7.13066e-75	down	7	132159207	132178127	-	protein_coding	ornithine aminotransferase [Source:MGI Symbol%3BAcc:MGI:97394]	K00819: rocD, OAT; ornithine--oxo-acid transaminase [EC:2.6.1.13]	mmu00330: Arginine and proline metabolism - Mus musculus (house mouse); mmu01100: Metabolic pathways - Mus musculus (house mouse)	GO:0003824: catalytic activity; GO:0004587: ornithine-oxo-acid transaminase activity; GO:0005654: nucleoplasm; GO:0005737: cytoplasm; GO:0005737: cytoplasm; GO:0005739: mitochondrion; GO:0005739: mitochondrion; GO:0005759: mitochondrial matrix; GO:0008483: transaminase activity; GO:0010121: arginine catabolic process to proline via ornithine; GO:0016740: transferase activity; GO:0019544: arginine…
ENSMUSG00000038576	Susd4	25	13	18	0.1764	0.0964	0.1235	-6.2968	1.65538e-77	1.2787e-73	down	1	182591425	182724156	+	protein_coding	sushi domain containing 4 [Source:MGI Symbol%3BAcc:MGI:2138351]	K23822: SUSD4; sushi domain-containing protein 4		GO:0003674: molecular_function; GO:0005575: cellular_component; GO:0016020: membrane; GO:0016021: integral component of membrane; GO:0030449: regulation of complement activation; GO:0045957: negative regulation of complement activation, alternative pathway; GO:0045957: negative regulation of complement activation, alternative pathway; GO:0045959: negative regulation of complement activation, clas…
ENSMUSG00000073830	Mup14	163	72	83	3.2109	1.4908	1.5899	-5.6506	7.9973e-69	4.11834e-65	down	4	61256022	61259999	-	protein_coding	major urinary protein 14 [Source:MGI Symbol%3BAcc:MGI:3702005]			GO:0003674: molecular_function; GO:0005549: odorant binding; GO:0005615: extracellular space; GO:0005615: extracellular space; GO:0008150: biological_process
ENSMUSG00000091867	Cyp2a22	774	699	848	6.1164	5.806	6.5165	4.46353	2.58637e-54	9.98919e-51	up	7	26631056	26638809	-	protein_coding	cytochrome P450%2C family 2%2C subfamily a%2C polypeptide 22 [Source:MGI Symbol%3BAcc:MGI:3648316]			GO:0005737: cytoplasm; GO:0005881: cytoplasmic microtubule; GO:0006082: organic acid metabolic process; GO:0006805: xenobiotic metabolic process; GO:0008389: coumarin 7-hydroxylase activity; GO:0008392: arachidonic acid epoxygenase activity; GO:0008395: steroid hydroxylase activity; GO:0008395: steroid hydroxylase activity; GO:0009804: coumarin metabolic process; GO:0016491: oxidoreductase activi…
ENSMUSG00000030762	Aqp8	8030	10536	7974	138.269	190.694	133.522	2.97991	6.83076e-51	2.11057e-47	up	7	123061514	123067227	+	protein_coding	aquaporin 8 [Source:MGI Symbol%3BAcc:MGI:1195271]	K09869: AQP8; aquaporin-8	mmu04976: Bile secretion - Mus musculus (house mouse)	GO:0005886: plasma membrane; GO:0005886: plasma membrane; GO:0005887: integral component of plasma membrane; GO:0006833: water transport; GO:0006833: water transport; GO:0006833: water transport; GO:0015250: water channel activity; GO:0015250: water channel activity; GO:0015250: water channel activity; GO:0015267: channel activity; GO:0015722: canalicular bile acid transport; GO:0016020: membrane…
ENSMUSG00000032028	Nxpe2	98	77	78	0.6504	0.5371	0.5034	-2.90634	3.07611e-47	7.92046e-44	down	9	48229306	48264754	-	protein_coding	neurexophilin and PC-esterase domain family%2C member 2 [Source:MGI Symbol%3BAcc:MGI:1925502]			GO:0003674: molecular_function; GO:0005575: cellular_component; GO:0008150: biological_process; GO:0016020: membrane; GO:0016021: integral component of membrane
ENSMUSG00000030483	Cyp2b10	788	611	841	10.1572	8.2783	10.5417	4.46223	7.58417e-44	1.67383e-40	up	7	25597045	25626049	+	protein_coding	cytochrome P450%2C family 2%2C subfamily b%2C polypeptide 10 [Source:MGI Symbol%3BAcc:MGI:88598]	K07412: CYP2B; cytochrome P450 family 2 subfamily B [EC:1.14.14.1]	mmu00140: Steroid hormone biosynthesis - Mus musculus (house mouse); mmu00590: Arachidonic acid metabolism - Mus musculus (house mouse); mmu00830: Retinol metabolism - Mus musculus (house mouse); mmu01100: Metabolic pathways - Mus musculus (house mouse); mmu05207: Chemical carcinogenesis - receptor activation - Mus musculus (house mouse)	GO:0004497: monooxygenase activity; GO:0005506: iron ion binding; GO:0005737: cytoplasm; GO:0005743: mitochondrial inner membrane; GO:0005783: endoplasmic reticulum; GO:0006082: organic acid metabolic process; GO:0006805: xenobiotic metabolic process; GO:0006805: xenobiotic metabolic process; GO:0008202: steroid metabolic process; GO:0008390: testosterone 16-alpha-hydroxylase activity; GO:0008392…
ENSMUSG00000004038	Gstm3	8733	9783	8843	181.343	213.531	178.568	3.88959	1.84379e-38	3.56059e-35	up	3	107871012	107876599	-	protein_coding	glutathione S-transferase%2C mu 3 [Source:MGI Symbol%3BAcc:MGI:106026]	K00799: GST, gst; glutathione S-transferase [EC:2.5.1.18]	mmu00480: Glutathione metabolism - Mus musculus (house mouse); mmu00980: Metabolism of xenobiotics by cytochrome P450 - Mus musculus (house mouse); mmu00982: Drug metabolism - cytochrome P450 - Mus musculus (house mouse); mmu00983: Drug metabolism - other enzymes - Mus musculus (house mouse); mmu01100: Metabolic pathways - Mus musculus (house mouse); mmu01524: Platinum drug resistance - Mus muscu…	GO:0004364: glutathione transferase activity; GO:0004364: glutathione transferase activity; GO:0005737: cytoplasm; GO:0005829: cytosol; GO:0006749: glutathione metabolic process; GO:0009617: response to bacterium; GO:0016740: transferase activity; GO:0019899: enzyme binding; GO:0042803: protein homodimerization activity; GO:0043295: glutathione binding; GO:0045171: intercellular bridge; GO:007140…
ENSMUSG00000035686	Thrsp	4521	6349	5115	56.225	82.995	61.8596	3.43068	4.07383e-37	6.99296e-34	up	7	97062145	97066937	-	protein_coding	thyroid hormone responsive [Source:MGI Symbol%3BAcc:MGI:109126]			GO:0005515: protein binding; GO:0005634: nucleus; GO:0005654: nucleoplasm; GO:0005737: cytoplasm; GO:0005829: cytosol; GO:0005829: cytosol; GO:0006629: lipid metabolic process; GO:0009617: response to bacterium; GO:0010866: regulation of triglyceride biosynthetic process; GO:0042802: identical protein binding; GO:0042802: identical protein binding; GO:0042803: protein homodimerization activity; G…
ENSMUSG00000015568	Lpl	5174	4371	4224	13.4428	11.937	10.6722	2.84468	2.18186e-36	3.37076e-33	up	8	69333143	69360100	+	protein_coding	lipoprotein lipase [Source:MGI Symbol%3BAcc:MGI:96820]	K01059: LPL; lipoprotein lipase [EC:3.1.1.34]	mmu00561: Glycerolipid metabolism - Mus musculus (house mouse); mmu03320: PPAR signaling pathway - Mus musculus (house mouse); mmu04979: Cholesterol metabolism - Mus musculus (house mouse); mmu05010: Alzheimer disease - Mus musculus (house mouse)	GO:0004465: lipoprotein lipase activity; GO:0004465: lipoprotein lipase activity; GO:0004465: lipoprotein lipase activity; GO:0004620: phospholipase activity; GO:0004806: triglyceride lipase activity; GO:0004806: triglyceride lipase activity; GO:0005102: signaling receptor binding; GO:0005509: calcium ion binding; GO:0005515: protein binding; GO:0005576: extracellular region; GO:0005615: extracel…
ENSMUSG00000029816	Gpnmb	566	467	446	2.3654	2.0515	1.8126	6.19926	2.92251e-34	4.10453e-31	up	6	49013480	49047863	+	protein_coding	glycoprotein (transmembrane) nmb [Source:MGI Symbol%3BAcc:MGI:1934765]	K20732: GPNMB; transmembrane glycoprotein NMB		GO:0001818: negative regulation of cytokine production; GO:0001934: positive regulation of protein phosphorylation; GO:0001934: positive regulation of protein phosphorylation; GO:0001934: positive regulation of protein phosphorylation; GO:0005178: integrin binding; GO:0005178: integrin binding; GO:0005768: endosome; GO:0005886: plasma membrane; GO:0005887: integral component of plasma membrane; G…
ENSMUSG00000030946	Lhpp	320	210	400	3.6057	2.4872	4.383	-2.97095	2.54333e-32	3.27432e-29	down	7	132212367	132308149	+	protein_coding	phospholysine phosphohistidine inorganic pyrophosphate phosphatase [Source:MGI Symbol%3BAcc:MGI:1923679]	K11725: LHPP; phospholysine phosphohistidine inorganic pyrophosphate phosphatase [EC:3.6.1.1 3.1.3.-]	mmu00190: Oxidative phosphorylation - Mus musculus (house mouse)	GO:0004427: inorganic diphosphate phosphatase activity; GO:0004427: inorganic diphosphate phosphatase activity; GO:0005634: nucleus; GO:0005737: cytoplasm; GO:0005829: cytosol; GO:0005829: cytosol; GO:0006796: phosphate-containing compound metabolic process; GO:0016311: dephosphorylation; GO:0016607: nuclear speck; GO:0016787: hydrolase activity; GO:0016791: phosphatase activity; GO:0042803: prot…
ENSMUSG00000066441	Rdh11	4598	5835	4001	36.2294	48.3265	30.6569	2.46068	5.21273e-31	6.19473e-28	up	12	79221111	79239067	-	protein_coding	retinol dehydrogenase 11 [Source:MGI Symbol%3BAcc:MGI:102581]	K11152: RDH11; retinol dehydrogenase 11 [EC:1.1.1.300]	mmu00830: Retinol metabolism - Mus musculus (house mouse); mmu01100: Metabolic pathways - Mus musculus (house mouse); mmu01240: Biosynthesis of cofactors - Mus musculus (house mouse)	GO:0001523: retinoid metabolic process; GO:0001917: photoreceptor inner segment; GO:0005783: endoplasmic reticulum; GO:0005789: endoplasmic reticulum membrane; GO:0006629: lipid metabolic process; GO:0007601: visual perception; GO:0016020: membrane; GO:0016021: integral component of membrane; GO:0016062: adaptation of rhodopsin mediated signaling; GO:0016491: oxidoreductase activity; GO:0033721: …
ENSMUSG00000038599	Capn8	9	9	13	0.065	0.0683	0.0913	-4.98347	7.97798e-30	8.8037e-27	down	1	182392572	182459917	+	protein_coding	calpain 8 [Source:MGI Symbol%3BAcc:MGI:2181366]	K08577: CAPN8; calpain-8 [EC:3.4.22.-]		GO:0004198: calcium-dependent cysteine-type endopeptidase activity; GO:0004198: calcium-dependent cysteine-type endopeptidase activity; GO:0004198: calcium-dependent cysteine-type endopeptidase activity; GO:0005509: calcium ion binding; GO:0005737: cytoplasm; GO:0005794: Golgi apparatus; GO:0006508: proteolysis; GO:0007586: digestion; GO:0008233: peptidase activity; GO:0008234: cysteine-type pept…
ENSMUSG00000073834	Mup11	199	167	164	3.4375	3.0322	2.7548	-5.26567	6.66801e-29	6.86761e-26	down	4	60614465	60618410	-	protein_coding	major urinary protein 11 [Source:MGI Symbol%3BAcc:MGI:3709617]			GO:0003674: molecular_function; GO:0005550: pheromone binding; GO:0005575: cellular_component; GO:0008150: biological_process; GO:0071394: cellular response to testosterone stimulus
ENSMUSG00000029675	Eln	368	432	342	1.2371	1.5265	1.118	3.63769	7.78157e-28	7.51359e-25	up	5	134731447	134776177	-	protein_coding	elastin [Source:MGI Symbol%3BAcc:MGI:95317]	K14211: ELN; elastin	mmu04974: Protein digestion and absorption - Mus musculus (house mouse)	GO:0001974: blood vessel remodeling; GO:0003151: outflow tract morphogenesis; GO:0005201: extracellular matrix structural constituent; GO:0005515: protein binding; GO:0005576: extracellular region; GO:0005615: extracellular space; GO:0005739: mitochondrion; GO:0007519: skeletal muscle tissue development; GO:0030023: extracellular matrix constituent conferring elasticity; GO:0030023: extracellular…
ENSMUSG00000031349	Nsdhl	4418	5562	3950	42.1565	55.7856	36.6524	2.1367	5.60016e-27	5.08922e-24	up	X	71962163	72002120	+	protein_coding	NAD(P) dependent steroid dehydrogenase-like [Source:MGI Symbol%3BAcc:MGI:1099438]	K07748: NSDHL, ERG26; sterol-4alpha-carboxylate 3-dehydrogenase (decarboxylating) [EC:1.1.1.170]	mmu00100: Steroid biosynthesis - Mus musculus (house mouse); mmu01100: Metabolic pathways - Mus musculus (house mouse)	GO:0000252: C-3 sterol dehydrogenase (C-4 sterol decarboxylase) activity; GO:0001942: hair follicle development; GO:0003854: 3-beta-hydroxy-delta5-steroid dehydrogenase activity; GO:0005783: endoplasmic reticulum; GO:0005783: endoplasmic reticulum; GO:0005783: endoplasmic reticulum; GO:0005811: lipid droplet; GO:0005811: lipid droplet; GO:0006629: lipid metabolic process; GO:0006694: steroid bios…
ENSMUSG00000079507	H2-Q1	758	687	456	7.2151	6.8736	4.2209	3.01783	9.02779e-25	7.74835e-22	up	17	35539381	35544075	+	protein_coding	histocompatibility 2%2C Q region locus 1 [Source:MGI Symbol%3BAcc:MGI:95928]	K06751: MHC1; MHC class I antigen	mmu04144: Endocytosis - Mus musculus (house mouse); mmu04145: Phagosome - Mus musculus (house mouse); mmu04218: Cellular senescence - Mus musculus (house mouse); mmu04514: Cell adhesion molecules - Mus musculus (house mouse); mmu04612: Antigen processing and presentation - Mus musculus (house mouse); mmu04940: Type I diabetes mellitus - Mus musculus (house mouse); mmu05163: Human cytomegalovirus …	GO:0000139: Golgi membrane; GO:0001916: positive regulation of T cell mediated cytotoxicity; GO:0002476: antigen processing and presentation of endogenous peptide antigen via MHC class Ib; GO:0002486: antigen processing and presentation of endogenous peptide antigen via MHC class I via ER pathway, TAP-independent; GO:0005102: signaling receptor binding; GO:0005102: signaling receptor binding; GO:…
ENSMUSG00000025153	Fasn	27106	42487	24090	67.4079	111.059	58.2571	2.62837	1.35256e-24	1.09139e-21	up	11	120696672	120715373	-	protein_coding	fatty acid synthase [Source:MGI Symbol%3BAcc:MGI:95485]	K00665: FASN; fatty acid synthase, animal type [EC:2.3.1.85]	mmu00061: Fatty acid biosynthesis - Mus musculus (house mouse); mmu01100: Metabolic pathways - Mus musculus (house mouse); mmu01212: Fatty acid metabolism - Mus musculus (house mouse); mmu04152: AMPK signaling pathway - Mus musculus (house mouse); mmu04910: Insulin signaling pathway - Mus musculus (house mouse); mmu04936: Alcoholic liver disease - Mus musculus (house mouse)	GO:0002068: glandular epithelial cell development; GO:0003824: catalytic activity; GO:0004312: fatty acid synthase activity; GO:0004312: fatty acid synthase activity; GO:0004312: fatty acid synthase activity; GO:0004312: fatty acid synthase activity; GO:0004313: [acyl-carrier-protein] S-acetyltransferase activity; GO:0004314: [acyl-carrier-protein] S-malonyltransferase activity; GO:0004315: 3-oxo…
ENSMUSG00000110755	BC049987	553	682	766	8.2762	10.7286	11.1482	3.00767	1.41289e-24	1.09139e-21	up	9	44581745	44583563	-	lncRNA	cDNA sequence BC049987 [Source:MGI Symbol%3BAcc:MGI:3039606]			GO:0003674: molecular_function; GO:0005575: cellular_component; GO:0008150: biological_process
ENSMUSG00000038754	Elovl3	3743	2546	3138	51.5933	36.8879	42.0623	-3.1869	5.66363e-23	4.16654e-20	down	19	46120336	46124133	+	protein_coding	elongation of very long chain fatty acids (FEN1/Elo2%2C SUR4/Elo3%2C yeast)-like 3 [Source:MGI Symbol%3BAcc:MGI:1195976]	K10248: ELOVL3; elongation of very long chain fatty acids protein 3 [EC:2.3.1.199]	mmu00062: Fatty acid elongation - Mus musculus (house mouse); mmu01040: Biosynthesis of unsaturated fatty acids - Mus musculus (house mouse); mmu01100: Metabolic pathways - Mus musculus (house mouse); mmu01212: Fatty acid metabolism - Mus musculus (house mouse)	GO:0005783: endoplasmic reticulum; GO:0006629: lipid metabolic process; GO:0006631: fatty acid metabolic process; GO:0006633: fatty acid biosynthetic process; GO:0009922: fatty acid elongase activity; GO:0009922: fatty acid elongase activity; GO:0016020: membrane; GO:0016021: integral component of membrane; GO:0016740: transferase activity; GO:0019367: fatty acid elongation, saturated fatty acid;…
ENSMUSG00000031740	Mmp2	544	372	365	4.3932	3.1577	2.8664	3.44533	6.44525e-23	4.52603e-20	up	8	93553919	93580048	+	protein_coding	matrix metallopeptidase 2 [Source:MGI Symbol%3BAcc:MGI:97009]	K01398: MMP2; matrix metalloproteinase-2 (gelatinase A) [EC:3.4.24.24]	mmu01522: Endocrine resistance - Mus musculus (house mouse); mmu04670: Leukocyte transendothelial migration - Mus musculus (house mouse); mmu04912: GnRH signaling pathway - Mus musculus (house mouse); mmu04915: Estrogen signaling pathway - Mus musculus (house mouse); mmu04926: Relaxin signaling pathway - Mus musculus (house mouse); mmu04933: AGE-RAGE signaling pathway in diabetic complications - …	GO:0001525: angiogenesis; GO:0001541: ovarian follicle development; GO:0001666: response to hypoxia; GO:0001666: response to hypoxia; GO:0001666: response to hypoxia; GO:0001955: blood vessel maturation; GO:0001957: intramembranous ossification; GO:0001968: fibronectin binding; GO:0004175: endopeptidase activity; GO:0004222: metalloendopeptidase activity; GO:0004222: metalloendopeptidase activity…
ENSMUSG00000093930	Hmgcs1	14496	18483	12411	85.9009	115.126	71.5193	2.13829	8.47071e-23	5.68974e-20	up	13	120151915	120169796	+	protein_coding	3-hydroxy-3-methylglutaryl-Coenzyme A synthase 1 [Source:MGI Symbol%3BAcc:MGI:107592]	K01641: HMGCS; hydroxymethylglutaryl-CoA synthase [EC:2.3.3.10]	mmu00280: Valine, leucine and isoleucine degradation - Mus musculus (house mouse); mmu00650: Butanoate metabolism - Mus musculus (house mouse); mmu00900: Terpenoid backbone biosynthesis - Mus musculus (house mouse); mmu01100: Metabolic pathways - Mus musculus (house mouse); mmu03320: PPAR signaling pathway - Mus musculus (house mouse)	GO:0004421: hydroxymethylglutaryl-CoA synthase activity; GO:0004421: hydroxymethylglutaryl-CoA synthase activity; GO:0005737: cytoplasm; GO:0005829: cytosol; GO:0005829: cytosol; GO:0006084: acetyl-CoA metabolic process; GO:0006629: lipid metabolic process; GO:0006694: steroid biosynthetic process; GO:0006695: cholesterol biosynthetic process; GO:0008202: steroid metabolic process; GO:0008203: ch…
ENSMUSG00000005089	Slc1a2	1556	962	1145	3.2254	2.0961	2.3081	-2.0548	1.54044e-22	9.91593e-20	down	2	102489004	102621129	+	protein_coding	solute carrier family 1 (glial high affinity glutamate transporter)%2C member 2 [Source:MGI Symbol%3BAcc:MGI:101931]	K05613: SLC1A2, EAAT2; solute carrier family 1 (glial high affinity glutamate transporter), member 2	mmu04721: Synaptic vesicle cycle - Mus musculus (house mouse); mmu04724: Glutamatergic synapse - Mus musculus (house mouse); mmu05014: Amyotrophic lateral sclerosis - Mus musculus (house mouse); mmu05016: Huntington disease - Mus musculus (house mouse)	GO:0005313: L-glutamate transmembrane transporter activity; GO:0005313: L-glutamate transmembrane transporter activity; GO:0005313: L-glutamate transmembrane transporter activity; GO:0005313: L-glutamate transmembrane transporter activity; GO:0005314: high-affinity L-glutamate transmembrane transporter activity; GO:0005314: high-affinity L-glutamate transmembrane transporter activity; GO:0005886:…
ENSMUSG00000001467	Cyp51	9974	10954	9471	61.5006	70.9961	56.7901	1.66786	6.08581e-22	3.76078e-19	up	5	4131145	4154746	-	protein_coding	cytochrome P450%2C family 51 [Source:MGI Symbol%3BAcc:MGI:106040]	K05917: CYP51; sterol 14alpha-demethylase [EC:1.14.14.154 1.14.15.36]	mmu00100: Steroid biosynthesis - Mus musculus (house mouse); mmu01100: Metabolic pathways - Mus musculus (house mouse)	GO:0001669: acrosomal vesicle; GO:0004497: monooxygenase activity; GO:0005506: iron ion binding; GO:0005737: cytoplasm; GO:0005783: endoplasmic reticulum; GO:0006629: lipid metabolic process; GO:0006694: steroid biosynthetic process; GO:0006695: cholesterol biosynthetic process; GO:0008202: steroid metabolic process; GO:0008203: cholesterol metabolic process; GO:0008398: sterol 14-demethylase act…
ENSMUSG00000021273	Fdft1	7823	8245	7602	51.7414	57.3202	48.8945	1.79405	1.54346e-21	9.17115e-19	up	14	63382599	63417027	-	protein_coding	farnesyl diphosphate farnesyl transferase 1 [Source:MGI Symbol%3BAcc:MGI:102706]	K00801: FDFT1; farnesyl-diphosphate farnesyltransferase [EC:2.5.1.21]	mmu00100: Steroid biosynthesis - Mus musculus (house mouse); mmu01100: Metabolic pathways - Mus musculus (house mouse)	GO:0003824: catalytic activity; GO:0004310: farnesyl-diphosphate farnesyltransferase activity; GO:0004310: farnesyl-diphosphate farnesyltransferase activity; GO:0005783: endoplasmic reticulum; GO:0005789: endoplasmic reticulum membrane; GO:0005789: endoplasmic reticulum membrane; GO:0006629: lipid metabolic process; GO:0006694: steroid biosynthetic process; GO:0006695: cholesterol biosynthetic pr…
ENSMUSG00000029661	Col1a2	2188	1599	1337	4.7935	3.6822	2.8484	2.4209	2.59435e-21	1.48445e-18	up	6	4504814	4541544	+	protein_coding	collagen%2C type I%2C alpha 2 [Source:MGI Symbol%3BAcc:MGI:88468]	K06236: COL1A; collagen type I alpha	mmu04151: PI3K-Akt signaling pathway - Mus musculus (house mouse); mmu04510: Focal adhesion - Mus musculus (house mouse); mmu04512: ECM-receptor interaction - Mus musculus (house mouse); mmu04611: Platelet activation - Mus musculus (house mouse); mmu04926: Relaxin signaling pathway - Mus musculus (house mouse); mmu04933: AGE-RAGE signaling pathway in diabetic complications - Mus musculus (house m…	GO:0001501: skeletal system development; GO:0001568: blood vessel development; GO:0002020: protease binding; GO:0005201: extracellular matrix structural constituent; GO:0005515: protein binding; GO:0005576: extracellular region; GO:0005581: collagen trimer; GO:0005584: collagen type I trimer; GO:0005584: collagen type I trimer; GO:0005584: collagen type I trimer; GO:0005615: extracellular space; …
ENSMUSG00000026043	Col3a1	3729	3415	2344	10.3419	9.9552	6.3216	2.98761	4.08917e-21	2.2562e-18	up	1	45350698	45388866	+	protein_coding	collagen%2C type III%2C alpha 1 [Source:MGI Symbol%3BAcc:MGI:88453]	K19720: COL3A; collagen type III alpha	mmu04611: Platelet activation - Mus musculus (house mouse); mmu04926: Relaxin signaling pathway - Mus musculus (house mouse); mmu04933: AGE-RAGE signaling pathway in diabetic complications - Mus musculus (house mouse); mmu04974: Protein digestion and absorption - Mus musculus (house mouse); mmu05146: Amoebiasis - Mus musculus (house mouse); mmu05415: Diabetic cardiomyopathy - Mus musculus (house …	GO:0001568: blood vessel development; GO:0001701: in utero embryonic development; GO:0001764: neuron migration; GO:0001894: tissue homeostasis; GO:0002020: protease binding; GO:0002062: chondrocyte differentiation; GO:0005178: integrin binding; GO:0005201: extracellular matrix structural constituent; GO:0005201: extracellular matrix structural constituent; GO:0005576: extracellular region; GO:000…
ENSMUSG00000022665	Ccdc80	1520	1478	1179	9.6388	9.8516	7.2704	1.87373	8.4292e-21	4.49044e-18	up	16	44913765	44948440	+	protein_coding	coiled-coil domain containing 80 [Source:MGI Symbol%3BAcc:MGI:1915146]			GO:0001968: fibronectin binding; GO:0005539: glycosaminoglycan binding; GO:0005576: extracellular region; GO:0005604: basement membrane; GO:0005604: basement membrane; GO:0005614: interstitial matrix; GO:0008201: heparin binding; GO:0009617: response to bacterium; GO:0010811: positive regulation of cell-substrate adhesion; GO:0010811: positive regulation of cell-substrate adhesion; GO:0030198: ex…
ENSMUSG00000002020	Ltbp2	298	220	197	0.9913	0.7692	0.6372	3.3777	9.26452e-21	4.77092e-18	up	12	84829986	84923306	-	protein_coding	latent transforming growth factor beta binding protein 2 [Source:MGI Symbol%3BAcc:MGI:99502]	K08023: LTBP2_3_4; latent transforming growth factor beta binding protein 2/3/4		GO:0005201: extracellular matrix structural constituent; GO:0005509: calcium ion binding; GO:0005576: extracellular region; GO:0008201: heparin binding; GO:0019838: growth factor binding; GO:0050436: microfibril binding; GO:0062023: collagen-containing extracellular matrix; GO:0097435: supramolecular fiber organization; GO:0097435: supramolecular fiber organization; GO:0097435: supramolecular fib…
ENSMUSG00000074254	Cyp2a4	359	166	390	5.6232	2.7331	5.9405	5.38629	1.26222e-20	6.29036e-18	up	7	26006594	26014513	+	protein_coding	cytochrome P450%2C family 2%2C subfamily a%2C polypeptide 4 [Source:MGI Symbol%3BAcc:MGI:88596]	K07411: CYP2A; cytochrome P450 family 2 subfamily A [EC:1.14.14.1]	mmu00830: Retinol metabolism - Mus musculus (house mouse); mmu01100: Metabolic pathways - Mus musculus (house mouse)	GO:0005737: cytoplasm; GO:0005881: cytoplasmic microtubule; GO:0006082: organic acid metabolic process; GO:0006805: xenobiotic metabolic process; GO:0008389: coumarin 7-hydroxylase activity; GO:0008392: arachidonic acid epoxygenase activity; GO:0008395: steroid hydroxylase activity; GO:0009804: coumarin metabolic process; GO:0016712: oxidoreductase activity, acting on paired donors, with incorpor…
ENSMUSG00000040441	Slc26a10	385	492	486	2.3193	3.1154	2.8471	2.41744	1.9838e-20	9.57742e-18	up	10	127007262	127016514	-	protein_coding	solute carrier family 26%2C member 10 [Source:MGI Symbol%3BAcc:MGI:2143920]	K14707: SLC26A10; solute carrier family 26, member 10		GO:0005887: integral component of plasma membrane; GO:0008271: secondary active sulfate transmembrane transporter activity; GO:0008272: sulfate transport; GO:0015106: bicarbonate transmembrane transporter activity; GO:0015108: chloride transmembrane transporter activity; GO:0015116: sulfate transmembrane transporter activity; GO:0015297: antiporter activity; GO:0016020: membrane; GO:0016021: inte…
ENSMUSG00000026475	Rgs16	5281	3344	5976	61.4648	40.9099	67.6375	2.99526	4.32197e-20	2.02334e-17	up	1	153616095	153621214	+	protein_coding	regulator of G-protein signaling 16 [Source:MGI Symbol%3BAcc:MGI:108407]	K16449: RGS; regulator of G-protein signaling		GO:0005096: GTPase activator activity; GO:0005096: GTPase activator activity; GO:0005096: GTPase activator activity; GO:0005515: protein binding; GO:0005737: cytoplasm; GO:0005737: cytoplasm; GO:0007186: G protein-coupled receptor signaling pathway; GO:0007186: G protein-coupled receptor signaling pathway; GO:0009968: negative regulation of signal transduction; GO:0016020: membrane; GO:0031224: i…
ENSMUSG00000020000	Moxd1	0	1	0	0	0.0089	0	-11.0375	4.55386e-20	2.0692e-17	down	10	24099415	24178688	+	protein_coding	monooxygenase%2C DBH-like 1 [Source:MGI Symbol%3BAcc:MGI:1921582]			GO:0003824: catalytic activity; GO:0004497: monooxygenase activity; GO:0004500: dopamine beta-monooxygenase activity; GO:0005507: copper ion binding; GO:0005615: extracellular space; GO:0005783: endoplasmic reticulum; GO:0005789: endoplasmic reticulum membrane; GO:0006589: octopamine biosynthetic process; GO:0016020: membrane; GO:0016021: integral component of membrane; GO:0016491: oxidoreductase…
ENSMUSG00000027605	Acss2	12525	18713	10115	33.5503	52.6883	26.3482	2.32338	1.19775e-19	5.28686e-17	up	2	155359868	155427644	+	protein_coding	acyl-CoA synthetase short-chain family member 2 [Source:MGI Symbol%3BAcc:MGI:1890410]	K01895: ACSS1_2, acs; acetyl-CoA synthetase [EC:6.2.1.1]	mmu00010: Glycolysis / Gluconeogenesis - Mus musculus (house mouse); mmu00620: Pyruvate metabolism - Mus musculus (house mouse); mmu00630: Glyoxylate and dicarboxylate metabolism - Mus musculus (house mouse); mmu00640: Propanoate metabolism - Mus musculus (house mouse); mmu01100: Metabolic pathways - Mus musculus (house mouse); mmu01200: Carbon metabolism - Mus musculus (house mouse)	GO:0000166: nucleotide binding; GO:0003987: acetate-CoA ligase activity; GO:0003987: acetate-CoA ligase activity; GO:0003987: acetate-CoA ligase activity; GO:0005524: ATP binding; GO:0005737: cytoplasm; GO:0005737: cytoplasm; GO:0005737: cytoplasm; GO:0005829: cytosol; GO:0006085: acetyl-CoA biosynthetic process; GO:0006085: acetyl-CoA biosynthetic process; GO:0006629: lipid metabolic process; GO…
ENSMUSG00000060181	Slc35e3	499	406	434	3.8526	3.2949	3.2585	-1.5675	1.13117e-18	4.8543e-16	down	10	117569584	117582270	-	protein_coding	solute carrier family 35%2C member E3 [Source:MGI Symbol%3BAcc:MGI:2448489]	K15285: SLC35E3; solute carrier family 35, member E3		GO:0005338: nucleotide-sugar transmembrane transporter activity; GO:0005794: Golgi apparatus; GO:0015297: antiporter activity; GO:0016020: membrane; GO:0016021: integral component of membrane
ENSMUSG00000040264	Gbp2b	93	65	72	0.8968	0.6589	0.6752	-2.66757	1.55559e-18	6.49523e-16	down	3	142300608	142324940	+	protein_coding	guanylate binding protein 2b [Source:MGI Symbol%3BAcc:MGI:95666]	K20897: GBP2; guanylate-binding protein 2	mmu04621: NOD-like receptor signaling pathway - Mus musculus (house mouse)	GO:0000166: nucleotide binding; GO:0002376: immune system process; GO:0003924: GTPase activity; GO:0003924: GTPase activity; GO:0005515: protein binding; GO:0005525: GTP binding; GO:0005576: extracellular region; GO:0005634: nucleus; GO:0005654: nucleoplasm; GO:0005737: cytoplasm; GO:0005794: Golgi apparatus; GO:0005829: cytosol; GO:0005886: plasma membrane; GO:0016020: membrane; GO:0016787: hydr…
ENSMUSG00000035561	Aldh1b1	6661	7593	6131	78.9096	94.5488	70.6299	1.83369	1.8144e-18	7.18734e-16	up	4	45799022	45804604	+	protein_coding	aldehyde dehydrogenase 1 family%2C member B1 [Source:MGI Symbol%3BAcc:MGI:1919785]	K00128: ALDH; aldehyde dehydrogenase (NAD+) [EC:1.2.1.3]	mmu00010: Glycolysis / Gluconeogenesis - Mus musculus (house mouse); mmu00053: Ascorbate and aldarate metabolism - Mus musculus (house mouse); mmu00071: Fatty acid degradation - Mus musculus (house mouse); mmu00280: Valine, leucine and isoleucine degradation - Mus musculus (house mouse); mmu00310: Lysine degradation - Mus musculus (house mouse); mmu00330: Arginine and proline metabolism - Mus mus…	GO:0004029: aldehyde dehydrogenase (NAD+) activity; GO:0005654: nucleoplasm; GO:0005739: mitochondrion; GO:0005739: mitochondrion; GO:0005829: cytosol; GO:0016491: oxidoreductase activity; GO:0016620: oxidoreductase activity, acting on the aldehyde or oxo group of donors, NAD or NADP as acceptor; GO:0043878: glyceraldehyde-3-phosphate dehydrogenase (NAD+) (non-phosphorylating) activity
ENSMUSG00000059743	Fdps	12420	17331	12568	80.3501	117.853	79.0674	2.22373	1.7693e-18	7.18734e-16	up	3	89000895	89009266	-	protein_coding	farnesyl diphosphate synthetase [Source:MGI Symbol%3BAcc:MGI:104888]	K00787: FDPS; farnesyl diphosphate synthase [EC:2.5.1.1 2.5.1.10]	mmu00900: Terpenoid backbone biosynthesis - Mus musculus (house mouse); mmu01100: Metabolic pathways - Mus musculus (house mouse); mmu05164: Influenza A - Mus musculus (house mouse); mmu05166: Human T-cell leukemia virus 1 infection - Mus musculus (house mouse)	GO:0004161: dimethylallyltranstransferase activity; GO:0004337: geranyltranstransferase activity; GO:0004337: geranyltranstransferase activity; GO:0005654: nucleoplasm; GO:0005737: cytoplasm; GO:0005739: mitochondrion; GO:0005759: mitochondrial matrix; GO:0005777: peroxisome; GO:0005829: cytosol; GO:0006629: lipid metabolic process; GO:0006694: steroid biosynthetic process; GO:0006695: cholestero…
ENSMUSG00000044042	Fmn1	394	449	301	0.6672	0.7992	0.4956	2.40369	2.93954e-18	1.13532e-15	up	2	113158081	113547112	+	protein_coding	formin 1 [Source:MGI Symbol%3BAcc:MGI:101815]	K10367: FMN1; formin 1		GO:0003779: actin binding; GO:0005515: protein binding; GO:0005634: nucleus; GO:0005634: nucleus; GO:0005737: cytoplasm; GO:0005737: cytoplasm; GO:0005789: endoplasmic reticulum membrane; GO:0005856: cytoskeleton; GO:0005884: actin filament; GO:0005886: plasma membrane; GO:0008017: microtubule binding; GO:0010467: gene expression; GO:0016020: membrane; GO:0017124: SH3 domain binding; GO:0030054: …
ENSMUSG00000040660	Cyp2b9	1131	828	1047	16.4123	12.6296	14.7748	10.4299	3.06649e-18	1.15547e-15	up	7	25872836	25910086	+	protein_coding	cytochrome P450%2C family 2%2C subfamily b%2C polypeptide 9 [Source:MGI Symbol%3BAcc:MGI:88600]	K07412: CYP2B; cytochrome P450 family 2 subfamily B [EC:1.14.14.1]	mmu00140: Steroid hormone biosynthesis - Mus musculus (house mouse); mmu00590: Arachidonic acid metabolism - Mus musculus (house mouse); mmu00830: Retinol metabolism - Mus musculus (house mouse); mmu01100: Metabolic pathways - Mus musculus (house mouse); mmu05207: Chemical carcinogenesis - receptor activation - Mus musculus (house mouse)	GO:0004497: monooxygenase activity; GO:0005506: iron ion binding; GO:0005737: cytoplasm; GO:0005783: endoplasmic reticulum; GO:0006082: organic acid metabolic process; GO:0006805: xenobiotic metabolic process; GO:0006805: xenobiotic metabolic process; GO:0008202: steroid metabolic process; GO:0008390: testosterone 16-alpha-hydroxylase activity; GO:0008392: arachidonic acid epoxygenase activity; G…
ENSMUSG00000049580	Tsku	942	946	856	8.408	8.8753	7.4299	-2.23761	1.23799e-17	4.55372e-15	down	7	97999875	98010535	-	protein_coding	tsukushi%2C small leucine rich proteoglycan [Source:MGI Symbol%3BAcc:MGI:2443855]	K08130: TSKU; tsukushi		GO:0005515: protein binding; GO:0005576: extracellular region; GO:0005615: extracellular space; GO:0005615: extracellular space; GO:0005886: plasma membrane; GO:0007275: multicellular organism development; GO:0007399: nervous system development; GO:0008203: cholesterol metabolic process; GO:0010468: regulation of gene expression; GO:0010977: negative regulation of neuron projection development; G…
ENSMUSG00000027952	Pmvk	2042	2679	2144	32.4518	44.7515	33.1341	1.85016	1.38541e-17	4.97749e-15	up	3	89361848	89376320	+	protein_coding	phosphomevalonate kinase [Source:MGI Symbol%3BAcc:MGI:1915853]	K13273: PMVK; phosphomevalonate kinase [EC:2.7.4.2]	mmu00900: Terpenoid backbone biosynthesis - Mus musculus (house mouse); mmu01100: Metabolic pathways - Mus musculus (house mouse); mmu04146: Peroxisome - Mus musculus (house mouse)	GO:0000166: nucleotide binding; GO:0004631: phosphomevalonate kinase activity; GO:0004631: phosphomevalonate kinase activity; GO:0004631: phosphomevalonate kinase activity; GO:0005524: ATP binding; GO:0005737: cytoplasm; GO:0005829: cytosol; GO:0006629: lipid metabolic process; GO:0006694: steroid biosynthetic process; GO:0006695: cholesterol biosynthetic process; GO:0006695: cholesterol biosynth…
ENSMUSG00000027698	Nceh1	800	687	624	4.1459	3.7423	3.1447	-1.45176	1.64016e-17	5.75884e-15	down	3	27237114	27338757	+	protein_coding	neutral cholesterol ester hydrolase 1 [Source:MGI Symbol%3BAcc:MGI:2443191]	K14349: NCEH1, AADACL1; neutral cholesterol ester hydrolase 1 [EC:3.1.1.-]	mmu04927: Cortisol synthesis and secretion - Mus musculus (house mouse); mmu04934: Cushing syndrome - Mus musculus (house mouse); mmu04976: Bile secretion - Mus musculus (house mouse); mmu04979: Cholesterol metabolism - Mus musculus (house mouse)	GO:0005783: endoplasmic reticulum; GO:0005886: plasma membrane; GO:0006470: protein dephosphorylation; GO:0006629: lipid metabolic process; GO:0006805: xenobiotic metabolic process; GO:0016020: membrane; GO:0016021: integral component of membrane; GO:0016042: lipid catabolic process; GO:0017171: serine hydrolase activity; GO:0017171: serine hydrolase activity; GO:0042301: phosphate ion binding; G…
ENSMUSG00000058258	Idi1	4423	5795	3316	34.3534	47.3106	25.0457	2.33017	1.70688e-17	5.85989e-15	up	13	8935537	8942487	+	protein_coding	isopentenyl-diphosphate delta isomerase [Source:MGI Symbol%3BAcc:MGI:2442264]	K01823: idi, IDI; isopentenyl-diphosphate Delta-isomerase [EC:5.3.3.2]	mmu00900: Terpenoid backbone biosynthesis - Mus musculus (house mouse); mmu01100: Metabolic pathways - Mus musculus (house mouse)	GO:0000287: magnesium ion binding; GO:0004452: isopentenyl-diphosphate delta-isomerase activity; GO:0004452: isopentenyl-diphosphate delta-isomerase activity; GO:0005737: cytoplasm; GO:0005739: mitochondrion; GO:0005777: peroxisome; GO:0008299: isoprenoid biosynthetic process; GO:0009240: isopentenyl diphosphate biosynthetic process; GO:0030145: manganese ion binding; GO:0035634: response to stil…
ENSMUSG00000023832	Acat2	2993	3294	2659	32.028	37.0509	27.67	1.54249	1.78702e-17	6.00167e-15	up	17	13161777	13179634	-	protein_coding	acetyl-Coenzyme A acetyltransferase 2 [Source:MGI Symbol%3BAcc:MGI:87871]	K00626: ACAT, atoB; acetyl-CoA C-acetyltransferase [EC:2.3.1.9]	mmu00071: Fatty acid degradation - Mus musculus (house mouse); mmu00280: Valine, leucine and isoleucine degradation - Mus musculus (house mouse); mmu00310: Lysine degradation - Mus musculus (house mouse); mmu00380: Tryptophan metabolism - Mus musculus (house mouse); mmu00620: Pyruvate metabolism - Mus musculus (house mouse); mmu00630: Glyoxylate and dicarboxylate metabolism - Mus musculus (house …	GO:0003985: acetyl-CoA C-acetyltransferase activity; GO:0003985: acetyl-CoA C-acetyltransferase activity; GO:0005737: cytoplasm; GO:0005739: mitochondrion; GO:0005739: mitochondrion; GO:0005829: cytosol; GO:0006635: fatty acid beta-oxidation; GO:0016740: transferase activity; GO:0016746: acyltransferase activity; GO:0016747: acyltransferase activity, transferring groups other than amino-acyl grou…
ENSMUSG00000020241	Col6a2	547	528	399	1.7885	1.8146	1.2687	2.17651	3.08722e-17	1.01478e-14	up	10	76431596	76459464	-	protein_coding	collagen%2C type VI%2C alpha 2 [Source:MGI Symbol%3BAcc:MGI:88460]	K06238: COL6A; collagen type VI alpha	mmu04151: PI3K-Akt signaling pathway - Mus musculus (house mouse); mmu04510: Focal adhesion - Mus musculus (house mouse); mmu04512: ECM-receptor interaction - Mus musculus (house mouse); mmu04974: Protein digestion and absorption - Mus musculus (house mouse); mmu05165: Human papillomavirus infection - Mus musculus (house mouse)	GO:0005518: collagen binding; GO:0005576: extracellular region; GO:0005581: collagen trimer; GO:0005615: extracellular space; GO:0005615: extracellular space; GO:0007155: cell adhesion; GO:0016020: membrane; GO:0030020: extracellular matrix structural constituent conferring tensile strength; GO:0031012: extracellular matrix; GO:0032991: protein-containing complex; GO:0042383: sarcolemma; GO:00620…
ENSMUSG00000022003	Slc25a30	870	526	588	5.1814	3.2928	3.4054	-1.905	7.33295e-17	2.36014e-14	down	14	75997557	76024477	-	protein_coding	solute carrier family 25%2C member 30 [Source:MGI Symbol%3BAcc:MGI:1914804]	K15106: SLC25A14_30; solute carrier family 25 (mitochondrial carrier), member 14/30		GO:0005739: mitochondrion; GO:0005739: mitochondrion; GO:0005743: mitochondrial inner membrane; GO:0008272: sulfate transport; GO:0015116: sulfate transmembrane transporter activity; GO:0015117: thiosulfate transmembrane transporter activity; GO:0015131: oxaloacetate transmembrane transporter activity; GO:0015140: malate transmembrane transporter activity; GO:0015141: succinate transmembrane tran…
ENSMUSG00000030528	Blm	343	385	422	1.0639	1.2552	1.2728	3.04792	8.8141e-17	2.77896e-14	up	7	80104481	80184867	-	protein_coding	Bloom syndrome%2C RecQ like helicase [Source:MGI Symbol%3BAcc:MGI:1328362]	K10901: BLM, RECQL3, SGS1; bloom syndrome protein [EC:5.6.2.4]	mmu03440: Homologous recombination - Mus musculus (house mouse); mmu03460: Fanconi anemia pathway - Mus musculus (house mouse)	GO:0000079: regulation of cyclin-dependent protein serine/threonine kinase activity; GO:0000166: nucleotide binding; GO:0000228: nuclear chromosome; GO:0000400: four-way junction DNA binding; GO:0000403: Y-form DNA binding; GO:0000405: bubble DNA binding; GO:0000723: telomere maintenance; GO:0000723: telomere maintenance; GO:0000724: double-strand break repair via homologous recombination; GO:000…
ENSMUSG00000032334	Loxl1	301	202	251	2.4854	1.7532	2.0154	3.05996	9.50039e-17	2.93543e-14	up	9	58195021	58220469	-	protein_coding	lysyl oxidase-like 1 [Source:MGI Symbol%3BAcc:MGI:106096]	K14678: LOXL1; lysyl oxidase-like protein 1 [EC:1.4.3.-]		GO:0001669: acrosomal vesicle; GO:0004720: protein-lysine 6-oxidase activity; GO:0005507: copper ion binding; GO:0005515: protein binding; GO:0005576: extracellular region; GO:0005604: basement membrane; GO:0005615: extracellular space; GO:0005615: extracellular space; GO:0005737: cytoplasm; GO:0016491: oxidoreductase activity; GO:0016641: oxidoreductase activity, acting on the CH-NH2 group of do…
ENSMUSG00000001119	Col6a1	889	779	669	5.5255	5.0893	4.0435	1.7207	1.19082e-16	3.60725e-14	up	10	76544626	76562002	-	protein_coding	collagen%2C type VI%2C alpha 1 [Source:MGI Symbol%3BAcc:MGI:88459]	K06238: COL6A; collagen type VI alpha	mmu04151: PI3K-Akt signaling pathway - Mus musculus (house mouse); mmu04510: Focal adhesion - Mus musculus (house mouse); mmu04512: ECM-receptor interaction - Mus musculus (house mouse); mmu04974: Protein digestion and absorption - Mus musculus (house mouse); mmu05165: Human papillomavirus infection - Mus musculus (house mouse)	GO:0005518: collagen binding; GO:0005576: extracellular region; GO:0005581: collagen trimer; GO:0005615: extracellular space; GO:0005615: extracellular space; GO:0007155: cell adhesion; GO:0030020: extracellular matrix structural constituent conferring tensile strength; GO:0031012: extracellular matrix; GO:0032991: protein-containing complex; GO:0042383: sarcolemma; GO:0048407: platelet-derived g…
ENSMUSG00000028716	Pdzk1ip1	262	300	380	4.0115	4.8282	5.6579	2.5031	1.59457e-16	4.73742e-14	up	4	114945905	114951096	+	protein_coding	PDZK1 interacting protein 1 [Source:MGI Symbol%3BAcc:MGI:1914432]			GO:0003674: molecular_function; GO:0008150: biological_process; GO:0016020: membrane; GO:0016021: integral component of membrane
ENSMUSG00000002831	Plin4	421	170	455	1.8049	0.7661	1.8969	-2.70577	1.62659e-16	4.74134e-14	down	17	56407591	56416803	-	protein_coding	perilipin 4 [Source:MGI Symbol%3BAcc:MGI:1929709]	K20254: PLIN4; perilipin-4	mmu03320: PPAR signaling pathway - Mus musculus (house mouse)	GO:0005737: cytoplasm; GO:0005811: lipid droplet; GO:0005829: cytosol; GO:0005886: plasma membrane; GO:0005886: plasma membrane; GO:0005886: plasma membrane; GO:0016020: membrane
ENSMUSG00000021336	Slc17a4	3159	3532	2974	14.3858	16.9066	13.1702	1.89491	1.79214e-16	5.12718e-14	up	13	24079873	24098992	-	protein_coding	solute carrier family 17 (sodium phosphate)%2C member 4 [Source:MGI Symbol%3BAcc:MGI:2442850]	K12300: SLC17A1S; MFS transporter, ACS family, solute carrier family 17 (sodium-dependent inorganic phosphate cotransporter), member 1/2/3/4		GO:0005764: lysosome; GO:0005886: plasma membrane; GO:0005887: integral component of plasma membrane; GO:0006811: ion transport; GO:0006814: sodium ion transport; GO:0006820: anion transport; GO:0015136: sialic acid transmembrane transporter activity; GO:0015293: symporter activity; GO:0015739: sialic acid transport; GO:0016020: membrane; GO:0016021: integral component of membrane; GO:0022857: tr…
ENSMUSG00000027577	Chrna4	909	3428	1217	4.9275	19.5324	6.4154	7.71936	1.83418e-16	5.15205e-14	up	2	180660173	180685339	-	protein_coding	cholinergic receptor%2C nicotinic%2C alpha polypeptide 4 [Source:MGI Symbol%3BAcc:MGI:87888]	K04806: CHRNA4; nicotinic acetylcholine receptor alpha-4	mmu04080: Neuroactive ligand-receptor interaction - Mus musculus (house mouse); mmu04725: Cholinergic synapse - Mus musculus (house mouse); mmu05033: Nicotine addiction - Mus musculus (house mouse); mmu05207: Chemical carcinogenesis - receptor activation - Mus musculus (house mouse)	GO:0001666: response to hypoxia; GO:0004888: transmembrane signaling receptor activity; GO:0005216: ion channel activity; GO:0005230: extracellular ligand-gated ion channel activity; GO:0005231: excitatory extracellular ligand-gated ion channel activity; GO:0005515: protein binding; GO:0005886: plasma membrane; GO:0005887: integral component of plasma membrane; GO:0005892: acetylcholine-gated cha…
ENSMUSG00000090213	Peds1	166	143	156	1.3841	1.2533	1.2649	-1.64903	1.91037e-16	5.27024e-14	down	2	167484528	167531742	-	protein_coding	plasmanylethanolamine desaturase 1 [Source:MGI Symbol%3BAcc:MGI:2142624]	K20656: TMEM189; plasmanylethanolamine desaturase [EC:1.14.19.77]	mmu00565: Ether lipid metabolism - Mus musculus (house mouse); mmu01100: Metabolic pathways - Mus musculus (house mouse)	GO:0005783: endoplasmic reticulum; GO:0005789: endoplasmic reticulum membrane; GO:0005789: endoplasmic reticulum membrane; GO:0005789: endoplasmic reticulum membrane; GO:0006629: lipid metabolic process; GO:0006631: fatty acid metabolic process; GO:0008611: ether lipid biosynthetic process; GO:0008611: ether lipid biosynthetic process; GO:0016020: membrane; GO:0016021: integral component of membr…
ENSMUSG00000020538	Srebf1	5572	5948	5356	26.9237	30.2097	25.167	1.36726	2.05549e-16	5.57111e-14	up	11	60089915	60113407	-	protein_coding	sterol regulatory element binding transcription factor 1 [Source:MGI Symbol%3BAcc:MGI:107606]	K07197: SREBP1, SREBF1; sterol regulatory element-binding transcription factor 1	mmu04152: AMPK signaling pathway - Mus musculus (house mouse); mmu04910: Insulin signaling pathway - Mus musculus (house mouse); mmu04931: Insulin resistance - Mus musculus (house mouse); mmu04932: Non-alcoholic fatty liver disease - Mus musculus (house mouse); mmu04936: Alcoholic liver disease - Mus musculus (house mouse)	GO:0000122: negative regulation of transcription by RNA polymerase II; GO:0000122: negative regulation of transcription by RNA polymerase II; GO:0000139: Golgi membrane; GO:0000977: RNA polymerase II transcription regulatory region sequence-specific DNA binding; GO:0000978: RNA polymerase II cis-regulatory region sequence-specific DNA binding; GO:0000978: RNA polymerase II cis-regulatory region s…	bHLH
ENSMUSG00000020142	Slc1a4	552	494	458	3.8276	3.6006	3.0883	1.84655	3.02992e-16	7.93378e-14	up	11	20252180	20282713	-	protein_coding	solute carrier family 1 (glutamate/neutral amino acid transporter)%2C member 4 [Source:MGI Symbol%3BAcc:MGI:2135601]	K05615: SLC1A4, SATT; solute carrier family 1 (neutral amino acid transporter), member 4		GO:0005254: chloride channel activity; GO:0005813: centrosome; GO:0005882: intermediate filament; GO:0005886: plasma membrane; GO:0005886: plasma membrane; GO:0015175: neutral amino acid transmembrane transporter activity; GO:0015175: neutral amino acid transmembrane transporter activity; GO:0015180: L-alanine transmembrane transporter activity; GO:0015180: L-alanine transmembrane transporter act…
ENSMUSG00000026185	Igfbp5	319	368	189	1.4459	1.7533	0.8331	3.00001	3.00467e-16	7.93378e-14	up	1	72897091	72914043	-	protein_coding	insulin-like growth factor binding protein 5 [Source:MGI Symbol%3BAcc:MGI:96440]	K23577: IGFBP5; insulin-like growth factor-binding protein 5		GO:0001558: regulation of cell growth; GO:0001649: osteoblast differentiation; GO:0001968: fibronectin binding; GO:0001968: fibronectin binding; GO:0005520: insulin-like growth factor binding; GO:0005520: insulin-like growth factor binding; GO:0005576: extracellular region; GO:0005615: extracellular space; GO:0007565: female pregnancy; GO:0014912: negative regulation of smooth muscle cell migrati…
ENSMUSG00000032018	Sc5d	28283	32902	26882	158.232	193.483	146.25	1.76605	4.12525e-16	1.06218e-13	up	9	42162891	42175552	-	protein_coding	sterol-C5-desaturase [Source:MGI Symbol%3BAcc:MGI:1353611]	K00227: SC5DL, ERG3; Delta7-sterol 5-desaturase [EC:1.14.19.20]	mmu00100: Steroid biosynthesis - Mus musculus (house mouse); mmu01100: Metabolic pathways - Mus musculus (house mouse)	GO:0000248: C-5 sterol desaturase activity; GO:0000248: C-5 sterol desaturase activity; GO:0005506: iron ion binding; GO:0005783: endoplasmic reticulum; GO:0005789: endoplasmic reticulum membrane; GO:0006629: lipid metabolic process; GO:0006694: steroid biosynthetic process; GO:0008202: steroid metabolic process; GO:0008610: lipid biosynthetic process; GO:0016020: membrane; GO:0016021: integral c…
ENSMUSG00000026473	Glul	12968	12206	11719	93.3452	92.3516	82.0307	-1.0358	5.71225e-16	1.4467e-13	down	1	153775690	153785469	+	protein_coding	glutamate-ammonia ligase (glutamine synthetase) [Source:MGI Symbol%3BAcc:MGI:95739]	K01915: glnA, GLUL; glutamine synthetase [EC:6.3.1.2]	mmu00220: Arginine biosynthesis - Mus musculus (house mouse); mmu00250: Alanine, aspartate and glutamate metabolism - Mus musculus (house mouse); mmu00630: Glyoxylate and dicarboxylate metabolism - Mus musculus (house mouse); mmu00910: Nitrogen metabolism - Mus musculus (house mouse); mmu01100: Metabolic pathways - Mus musculus (house mouse); mmu01230: Biosynthesis of amino acids - Mus musculus (…	GO:0000166: nucleotide binding; GO:0000287: magnesium ion binding; GO:0001525: angiogenesis; GO:0003824: catalytic activity; GO:0004356: glutamate-ammonia ligase activity; GO:0004356: glutamate-ammonia ligase activity; GO:0005515: protein binding; GO:0005524: ATP binding; GO:0005737: cytoplasm; GO:0005737: cytoplasm; GO:0005737: cytoplasm; GO:0005739: mitochondrion; GO:0005739: mitochondrion; GO:…
ENSMUSG00000020893	Per1	680	576	716	3.2875	2.927	3.3662	-1.44259	1.00636e-15	2.50762e-13	down	11	68986043	69000786	+	protein_coding	period circadian clock 1 [Source:MGI Symbol%3BAcc:MGI:1098283]	K21944: PER1; period circadian protein 1	mmu04710: Circadian rhythm - Mus musculus (house mouse); mmu04713: Circadian entrainment - Mus musculus (house mouse)	GO:0000122: negative regulation of transcription by RNA polymerase II; GO:0000122: negative regulation of transcription by RNA polymerase II; GO:0000122: negative regulation of transcription by RNA polymerase II; GO:0000976: transcription cis-regulatory region binding; GO:0000976: transcription cis-regulatory region binding; GO:0000978: RNA polymerase II cis-regulatory region sequence-specific DN…
ENSMUSG00000008035	Mid1ip1	964	1021	1017	12.3324	13.7292	12.6519	1.60491	3.22515e-15	7.90879e-13	up	X	10581252	10585929	+	protein_coding	Mid1 interacting protein 1 (gastrulation specific G12-like (zebrafish)) [Source:MGI Symbol%3BAcc:MGI:1915291]			GO:0005515: protein binding; GO:0005634: nucleus; GO:0005737: cytoplasm; GO:0005829: cytosol; GO:0005829: cytosol; GO:0005856: cytoskeleton; GO:0005874: microtubule; GO:0006629: lipid metabolic process; GO:0007026: negative regulation of microtubule depolymerization; GO:0008022: protein C-terminus binding; GO:0015630: microtubule cytoskeleton; GO:0042802: identical protein binding; GO:0045723: po…
ENSMUSG00000005514	Por	8203	7449	6642	55.5366	53.0098	43.7292	-1.19965	3.57624e-15	8.6327e-13	down	5	135698887	135764180	+	protein_coding	cytochrome p450 oxidoreductase [Source:MGI Symbol%3BAcc:MGI:97744]	K00327: POR; NADPH-ferrihemoprotein reductase [EC:1.6.2.4]		GO:0003420: regulation of growth plate cartilage chondrocyte proliferation; GO:0003958: NADPH-hemoprotein reductase activity; GO:0003958: NADPH-hemoprotein reductase activity; GO:0004128: cytochrome-b5 reductase activity, acting on NAD(P)H; GO:0005739: mitochondrion; GO:0005783: endoplasmic reticulum; GO:0005829: cytosol; GO:0008941: nitric oxide dioxygenase activity; GO:0009055: electron transfe…
ENSMUSG00000038155	Gstp2	98	62	99	2.397	1.594	2.3548	-2.85408	3.8149e-15	9.06714e-13	down	19	4090285	4096023	-	protein_coding	glutathione S-transferase%2C pi 2 [Source:MGI Symbol%3BAcc:MGI:95864]	K23790: GSTP; glutathione S-transferase P [EC:2.5.1.18]	mmu00480: Glutathione metabolism - Mus musculus (house mouse); mmu00980: Metabolism of xenobiotics by cytochrome P450 - Mus musculus (house mouse); mmu00982: Drug metabolism - cytochrome P450 - Mus musculus (house mouse); mmu00983: Drug metabolism - other enzymes - Mus musculus (house mouse); mmu01100: Metabolic pathways - Mus musculus (house mouse); mmu01524: Platinum drug resistance - Mus muscu…	GO:0004364: glutathione transferase activity; GO:0004364: glutathione transferase activity; GO:0004364: glutathione transferase activity; GO:0004602: glutathione peroxidase activity; GO:0005504: fatty acid binding; GO:0005634: nucleus; GO:0005737: cytoplasm; GO:0005739: mitochondrion; GO:0005829: cytosol; GO:0005829: cytosol; GO:0005886: plasma membrane; GO:0006469: negative regulation of protein…
ENSMUSG00000022562	Oplah	5325	4077	4833	24.8354	19.9868	21.9197	-1.19709	4.11863e-15	9.64072e-13	down	15	76180801	76212215	-	protein_coding	5-oxoprolinase (ATP-hydrolysing) [Source:MGI Symbol%3BAcc:MGI:1922725]	K01469: OPLAH, OXP1, oplAH; 5-oxoprolinase (ATP-hydrolysing) [EC:3.5.2.9]	mmu00480: Glutathione metabolism - Mus musculus (house mouse); mmu01100: Metabolic pathways - Mus musculus (house mouse)	GO:0000166: nucleotide binding; GO:0003824: catalytic activity; GO:0005524: ATP binding; GO:0006749: glutathione metabolic process; GO:0006749: glutathione metabolic process; GO:0016787: hydrolase activity; GO:0017168: 5-oxoprolinase (ATP-hydrolyzing) activity; GO:0017168: 5-oxoprolinase (ATP-hydrolyzing) activity; GO:0042802: identical protein binding
ENSMUSG00000053886	Sh2d4a	346	403	374	3.4591	4.235	3.6361	1.83906	5.57517e-15	1.28553e-12	up	8	68729219	68800351	+	protein_coding	SH2 domain containing 4A [Source:MGI Symbol%3BAcc:MGI:1919531]	K17577: SH2D4A; SH2 domain-containing protein 4A		GO:0005737: cytoplasm; GO:0005737: cytoplasm; GO:0005829: cytosol; GO:0019902: phosphatase binding; GO:0019902: phosphatase binding
ENSMUSG00000025464	Paox	1850	2148	1940	10.2635	12.526	10.4663	1.28021	9.52975e-15	2.16508e-12	up	7	139695712	139717137	+	protein_coding	polyamine oxidase (exo-N4-amino) [Source:MGI Symbol%3BAcc:MGI:1916983]	K00308: PAOX; N1-acetylpolyamine oxidase [EC:1.5.3.13]	mmu04146: Peroxisome - Mus musculus (house mouse)	GO:0005737: cytoplasm; GO:0005777: peroxisome; GO:0005782: peroxisomal matrix; GO:0006598: polyamine catabolic process; GO:0006598: polyamine catabolic process; GO:0009446: putrescine biosynthetic process; GO:0009447: putrescine catabolic process; GO:0016491: oxidoreductase activity; GO:0046203: spermidine catabolic process; GO:0046208: spermine catabolic process; GO:0046592: polyamine oxidase ac…
ENSMUSG00000022215	Fitm1	43	35	52	1.2056	1.0314	1.4177	-2.61123	1.07185e-14	2.39987e-12	down	14	55813074	55814411	+	protein_coding	fat storage-inducing transmembrane protein 1 [Source:MGI Symbol%3BAcc:MGI:1915930]			GO:0005783: endoplasmic reticulum; GO:0005789: endoplasmic reticulum membrane; GO:0006629: lipid metabolic process; GO:0008654: phospholipid biosynthetic process; GO:0010890: positive regulation of sequestering of triglyceride; GO:0016020: membrane; GO:0016021: integral component of membrane; GO:0017129: triglyceride binding; GO:0019915: lipid storage; GO:0019992: diacylglycerol binding; GO:00301…
ENSMUSG00000012123	Crybg2	186	274	210	0.6491	1.0051	0.7126	3.05355	1.31443e-14	2.90096e-12	up	4	133788126	133819815	+	protein_coding	crystallin beta-gamma domain containing 2 [Source:MGI Symbol%3BAcc:MGI:1334463]			GO:0003674: molecular_function; GO:0005575: cellular_component; GO:0008150: biological_process
ENSMUSG00000025203	Scd2	862	1512	602	4.2947	7.9183	2.9167	2.6439	2.40147e-14	5.2254e-12	up	19	44282113	44295303	+	protein_coding	stearoyl-Coenzyme A desaturase 2 [Source:MGI Symbol%3BAcc:MGI:98240]	K00507: SCD, desC; stearoyl-CoA desaturase (Delta-9 desaturase) [EC:1.14.19.1]	mmu01040: Biosynthesis of unsaturated fatty acids - Mus musculus (house mouse); mmu01100: Metabolic pathways - Mus musculus (house mouse); mmu01212: Fatty acid metabolism - Mus musculus (house mouse); mmu03320: PPAR signaling pathway - Mus musculus (house mouse); mmu04152: AMPK signaling pathway - Mus musculus (house mouse); mmu04936: Alcoholic liver disease - Mus musculus (house mouse)	GO:0004768: stearoyl-CoA 9-desaturase activity; GO:0004768: stearoyl-CoA 9-desaturase activity; GO:0004768: stearoyl-CoA 9-desaturase activity; GO:0004768: stearoyl-CoA 9-desaturase activity; GO:0005506: iron ion binding; GO:0005506: iron ion binding; GO:0005730: nucleolus; GO:0005783: endoplasmic reticulum; GO:0005783: endoplasmic reticulum; GO:0005789: endoplasmic reticulum membrane; GO:0005789…
ENSMUSG00000018593	Sparc	4976	4254	3836	35.7611	32.1351	26.8087	1.46635	2.79249e-14	5.99183e-12	up	11	55285326	55314009	-	protein_coding	secreted acidic cysteine rich glycoprotein [Source:MGI Symbol%3BAcc:MGI:98373]	K24262: SPARC; secreted protein acidic and rich in cysteine		GO:0001937: negative regulation of endothelial cell proliferation; GO:0005201: extracellular matrix structural constituent; GO:0005509: calcium ion binding; GO:0005509: calcium ion binding; GO:0005509: calcium ion binding; GO:0005515: protein binding; GO:0005518: collagen binding; GO:0005518: collagen binding; GO:0005576: extracellular region; GO:0005604: basement membrane; GO:0005615: extracellu…
ENSMUSG00000030214	Plbd1	1037	958	804	10.7218	10.4114	8.0837	-1.32368	3.00957e-14	6.36916e-12	down	6	136589068	136638926	-	protein_coding	phospholipase B domain containing 1 [Source:MGI Symbol%3BAcc:MGI:1914107]			GO:0004620: phospholipase activity; GO:0005576: extracellular region; GO:0005615: extracellular space; GO:0005764: lysosome; GO:0006629: lipid metabolic process; GO:0009395: phospholipid catabolic process; GO:0016042: lipid catabolic process; GO:0016787: hydrolase activity
ENSMUSG00000024029	Tff3	109	81	101	6.0189	4.7014	5.4235	-2.156	3.65454e-14	7.6296e-12	down	17	31344280	31348620	-	protein_coding	trefoil factor 3%2C intestinal [Source:MGI Symbol%3BAcc:MGI:104638]	K22454: TFF3; trefoil factor 3		GO:0005576: extracellular region; GO:0005615: extracellular space; GO:0005737: cytoplasm; GO:0010906: regulation of glucose metabolic process; GO:0030141: secretory granule; GO:0030277: maintenance of gastrointestinal epithelium; GO:0042802: identical protein binding
ENSMUSG00000097203	4732419C18Rik	321	358	333	2.412	2.8275	2.4332	1.79908	5.70963e-14	1.17611e-11	up	8	124471370	124481465	-	lncRNA	RIKEN cDNA 4732419C18 gene [Source:MGI Symbol%3BAcc:MGI:3045379]			GO:0003674: molecular_function; GO:0005575: cellular_component; GO:0008150: biological_process
ENSMUSG00000046179	E2f8	99	164	100	0.4952	0.8622	0.4864	-2.14451	6.38101e-14	1.29711e-11	down	7	48516177	48531344	-	protein_coding	E2F transcription factor 8 [Source:MGI Symbol%3BAcc:MGI:1922038]	K09391: E2F7_8; transcription factor E2F7/8		GO:0000122: negative regulation of transcription by RNA polymerase II; GO:0000122: negative regulation of transcription by RNA polymerase II; GO:0000978: RNA polymerase II cis-regulatory region sequence-specific DNA binding; GO:0000978: RNA polymerase II cis-regulatory region sequence-specific DNA binding; GO:0000981: DNA-binding transcription factor activity, RNA polymerase II-specific; GO:00009…	E2F
ENSMUSG00000027408	Cpxm1	224	152	144	2.5074	1.7884	1.5675	3.08867	8.58636e-14	1.71855e-11	up	2	130232695	130239494	-	protein_coding	carboxypeptidase X 1 (M14 family) [Source:MGI Symbol%3BAcc:MGI:1934569]	K08638: CPXM1; carboxypeptidase X1 [EC:3.4.17.-]		GO:0004181: metallocarboxypeptidase activity; GO:0005576: extracellular region; GO:0005615: extracellular space; GO:0005615: extracellular space; GO:0005615: extracellular space; GO:0006518: peptide metabolic process; GO:0008233: peptidase activity; GO:0008237: metallopeptidase activity; GO:0008270: zinc ion binding; GO:0016485: protein processing; GO:0016787: hydrolase activity; GO:0046872: meta…
ENSMUSG00000038233	Gask1a	918	932	811	6.4559	6.8895	5.5463	1.74785	8.67676e-14	1.71855e-11	up	9	121780054	121809275	+	protein_coding	golgi associated kinase 1A [Source:MGI Symbol%3BAcc:MGI:3041196]			GO:0003674: molecular_function; GO:0005576: extracellular region; GO:0005783: endoplasmic reticulum; GO:0005794: Golgi apparatus; GO:0005794: Golgi apparatus; GO:0008150: biological_process; GO:0016020: membrane; GO:0043231: intracellular membrane-bounded organelle
ENSMUSG00000068220	Lgals1	522	596	625	15.7371	18.8865	18.3231	1.4908	1.07125e-13	2.0949e-11	up	15	78810925	78814665	+	protein_coding	lectin%2C galactose binding%2C soluble 1 [Source:MGI Symbol%3BAcc:MGI:96777]	K06830: LGALS1; galectin-1		GO:0002317: plasma cell differentiation; GO:0005515: protein binding; GO:0005534: galactose binding; GO:0005576: extracellular region; GO:0005576: extracellular region; GO:0005615: extracellular space; GO:0005615: extracellular space; GO:0005615: extracellular space; GO:0005634: nucleus; GO:0005737: cytoplasm; GO:0005829: cytosol; GO:0006915: apoptotic process; GO:0007157: heterophilic cell-cell …
ENSMUSG00000054793	Cadm4	163	135	146	2.0534	1.7876	1.7886	-2.50491	1.14333e-13	2.20791e-11	down	7	24181448	24203964	+	protein_coding	cell adhesion molecule 4 [Source:MGI Symbol%3BAcc:MGI:2449088]	K06783: CADM4, IGSF4C, TSLL2; cell adhesion molecule 4		GO:0001932: regulation of protein phosphorylation; GO:0001932: regulation of protein phosphorylation; GO:0001933: negative regulation of protein phosphorylation; GO:0001933: negative regulation of protein phosphorylation; GO:0007155: cell adhesion; GO:0007156: homophilic cell adhesion via plasma membrane adhesion molecules; GO:0010801: negative regulation of peptidyl-threonine phosphorylation; GO…
ENSMUSG00000023992	Trem2	156	147	126	0.8586	0.8505	0.6744	2.77096	1.39955e-13	2.66933e-11	up	17	48653429	48661175	+	protein_coding	triggering receptor expressed on myeloid cells 2 [Source:MGI Symbol%3BAcc:MGI:1913150]	K14378: TREM2; triggering receptor expressed on myeloid cells 2	mmu04380: Osteoclast differentiation - Mus musculus (house mouse)	GO:0001530: lipopolysaccharide binding; GO:0001540: amyloid-beta binding; GO:0001774: microglial cell activation; GO:0001774: microglial cell activation; GO:0001786: phosphatidylserine binding; GO:0001934: positive regulation of protein phosphorylation; GO:0002282: microglial cell activation involved in immune response; GO:0002588: positive regulation of antigen processing and presentation of pep…
ENSMUSG00000020695	Mrc2	278	203	227	1.134	0.8704	0.9004	2.48227	1.50665e-13	2.83857e-11	up	11	105183469	105241965	+	protein_coding	mannose receptor%2C C type 2 [Source:MGI Symbol%3BAcc:MGI:107818]	K06560: MRC, CD206, CD280; mannose receptor, C type	mmu04145: Phagosome - Mus musculus (house mouse); mmu05152: Tuberculosis - Mus musculus (house mouse)	GO:0005518: collagen binding; GO:0005886: plasma membrane; GO:0006897: endocytosis; GO:0009986: cell surface; GO:0016020: membrane; GO:0016021: integral component of membrane; GO:0030246: carbohydrate binding; GO:0030574: collagen catabolic process; GO:0038023: signaling receptor activity
ENSMUSG00000041220	Elovl6	3547	4290	2783	15.0149	19.0885	11.4562	1.59661	2.32969e-13	4.33631e-11	up	3	129326004	129432144	+	protein_coding	ELOVL family member 6%2C elongation of long chain fatty acids (yeast) [Source:MGI Symbol%3BAcc:MGI:2156528]	K10203: ELOVL6; elongation of very long chain fatty acids protein 6 [EC:2.3.1.199]	mmu00062: Fatty acid elongation - Mus musculus (house mouse); mmu01040: Biosynthesis of unsaturated fatty acids - Mus musculus (house mouse); mmu01100: Metabolic pathways - Mus musculus (house mouse); mmu01212: Fatty acid metabolism - Mus musculus (house mouse)	GO:0005783: endoplasmic reticulum; GO:0006629: lipid metabolic process; GO:0006631: fatty acid metabolic process; GO:0006633: fatty acid biosynthetic process; GO:0009922: fatty acid elongase activity; GO:0009922: fatty acid elongase activity; GO:0009923: fatty acid elongase complex; GO:0016020: membrane; GO:0016021: integral component of membrane; GO:0016740: transferase activity; GO:0016747: acy…
ENSMUSG00000049723	Mmp12	160	160	86	0.6019	0.6326	0.3146	5.05635	5.90434e-13	1.08591e-10	up	9	7344381	7369499	+	protein_coding	matrix metallopeptidase 12 [Source:MGI Symbol%3BAcc:MGI:97005]	K01413: MMP12; matrix metalloproteinase-12 (macrophage elastase) [EC:3.4.24.65]		GO:0000122: negative regulation of transcription by RNA polymerase II; GO:0001046: core promoter sequence-specific DNA binding; GO:0004222: metalloendopeptidase activity; GO:0004222: metalloendopeptidase activity; GO:0005509: calcium ion binding; GO:0005518: collagen binding; GO:0005576: extracellular region; GO:0005576: extracellular region; GO:0005615: extracellular space; GO:0005615: extracell…
ENSMUSG00000028469	Npr2	749	603	739	4.369	3.6972	4.1919	-1.7031	6.1176e-13	1.11189e-10	down	4	43631935	43651244	+	protein_coding	natriuretic peptide receptor 2 [Source:MGI Symbol%3BAcc:MGI:97372]	K12324: ANPRB, NPR2; atrial natriuretic peptide receptor B [EC:4.6.1.2]	mmu00230: Purine metabolism - Mus musculus (house mouse); mmu01100: Metabolic pathways - Mus musculus (house mouse); mmu04022: cGMP-PKG signaling pathway - Mus musculus (house mouse); mmu04270: Vascular smooth muscle contraction - Mus musculus (house mouse); mmu04921: Oxytocin signaling pathway - Mus musculus (house mouse)	GO:0000166: nucleotide binding; GO:0001503: ossification; GO:0001653: peptide receptor activity; GO:0004383: guanylate cyclase activity; GO:0004383: guanylate cyclase activity; GO:0004383: guanylate cyclase activity; GO:0004672: protein kinase activity; GO:0005524: ATP binding; GO:0005525: GTP binding; GO:0005886: plasma membrane; GO:0005886: plasma membrane; GO:0005886: plasma membrane; GO:00058…
ENSMUSG00000120233	ENSMUSG00000120233	253	440	445	2.2501	4.1132	3.8486	2.46114	6.56996e-13	1.18022e-10	up	8	120138766	120155735	-	lncRNA	novel transcript
ENSMUSG00000055653	Gpc3	167	136	93	1.6901	1.4467	0.9152	3.94667	8.1314e-13	1.44393e-10	up	X	51361303	51702827	-	protein_coding	glypican 3 [Source:MGI Symbol%3BAcc:MGI:104903]	K08109: GPC3; glypican 3	mmu05205: Proteoglycans in cancer - Mus musculus (house mouse)	GO:0001658: branching involved in ureteric bud morphogenesis; GO:0001822: kidney development; GO:0005515: protein binding; GO:0005764: lysosome; GO:0005796: Golgi lumen; GO:0005886: plasma membrane; GO:0005886: plasma membrane; GO:0005887: integral component of plasma membrane; GO:0007224: smoothened signaling pathway; GO:0008285: negative regulation of cell population proliferation; GO:0009617: …
ENSMUSG00000031271	Serpina7	2291	1191	1384	25.4774	13.9217	14.9669	2.50988	9.87025e-13	1.73279e-10	up	X	137980006	137985985	-	protein_coding	serine (or cysteine) peptidase inhibitor%2C clade A (alpha-1 antiproteinase%2C antitrypsin)%2C member 7 [Source:MGI Symbol%3BAcc:MGI:3041197]	K20734: SERPINA7, TBG; thyroxine-binding globulin	mmu04918: Thyroid hormone synthesis - Mus musculus (house mouse)	GO:0004867: serine-type endopeptidase inhibitor activity; GO:0005576: extracellular region; GO:0005615: extracellular space; GO:0005615: extracellular space; GO:0009410: response to xenobiotic stimulus; GO:0009791: post-embryonic development; GO:0010951: negative regulation of endopeptidase activity; GO:0033189: response to vitamin A; GO:0042562: hormone binding; GO:0070327: thyroid hormone trans…
ENSMUSG00000026853	Crat	2770	2461	2831	13.9956	13.07	13.9098	-1.41713	1.10962e-12	1.91699e-10	down	2	30290483	30305825	-	protein_coding	carnitine acetyltransferase [Source:MGI Symbol%3BAcc:MGI:109501]	K00624: E2.3.1.7; carnitine O-acetyltransferase [EC:2.3.1.7]	mmu04146: Peroxisome - Mus musculus (house mouse)	GO:0003997: acyl-CoA oxidase activity; GO:0004092: carnitine O-acetyltransferase activity; GO:0004092: carnitine O-acetyltransferase activity; GO:0005739: mitochondrion; GO:0005739: mitochondrion; GO:0005743: mitochondrial inner membrane; GO:0005777: peroxisome; GO:0005777: peroxisome; GO:0005783: endoplasmic reticulum; GO:0006629: lipid metabolic process; GO:0006631: fatty acid metabolic process…
ENSMUSG00000121161	ENSMUSG00000121161	96	252	126	1.531	4.2243	1.9541	4.30796	1.11676e-12	1.91699e-10	up	6	72721003	72727005	+	lncRNA	novel transcript%2C antisense to Tcf7l1and KO:Tcf7l1
ENSMUSG00000008136	Fhl2	98	139	101	1.4064	2.0967	1.4095	3.92224	1.2848e-12	2.1812e-10	up	1	43162234	43236144	-	protein_coding	four and a half LIM domains 2 [Source:MGI Symbol%3BAcc:MGI:1338762]	K14380: FHL2; four and a half LIM domains protein 2	mmu04380: Osteoclast differentiation - Mus musculus (house mouse)	GO:0000122: negative regulation of transcription by RNA polymerase II; GO:0000122: negative regulation of transcription by RNA polymerase II; GO:0000122: negative regulation of transcription by RNA polymerase II; GO:0001649: osteoblast differentiation; GO:0003712: transcription coregulator activity; GO:0003714: transcription corepressor activity; GO:0005515: protein binding; GO:0005634: nucleus; …
ENSMUSG00000097321	1700028E10Rik	553	488	578	2.0289	1.882	2.0622	1.3617	1.30583e-12	2.19279e-10	up	5	151292140	151355583	+	lncRNA	RIKEN cDNA 1700028E10 gene [Source:MGI Symbol%3BAcc:MGI:1916713]			GO:0003674: molecular_function; GO:0005575: cellular_component; GO:0008150: biological_process
ENSMUSG00000037434	Slc30a1	437	391	318	2.2686	2.1336	1.6054	-1.59797	1.51064e-12	2.50946e-10	down	1	191638879	191645359	+	protein_coding	solute carrier family 30 (zinc transporter)%2C member 1 [Source:MGI Symbol%3BAcc:MGI:1345281]	K14688: SLC30A1, ZNT1; solute carrier family 30 (zinc transporter), member 1	mmu04978: Mineral absorption - Mus musculus (house mouse)	GO:0001701: in utero embryonic development; GO:0005385: zinc ion transmembrane transporter activity; GO:0005385: zinc ion transmembrane transporter activity; GO:0005737: cytoplasm; GO:0005783: endoplasmic reticulum; GO:0005783: endoplasmic reticulum; GO:0005794: Golgi apparatus; GO:0005794: Golgi apparatus; GO:0005886: plasma membrane; GO:0006811: ion transport; GO:0006812: cation transport; GO:0…
ENSMUSG00000040350	Trim7	564	592	742	2.0211	2.2298	2.5856	1.58058	1.74606e-12	2.86967e-10	up	11	48716967	48743036	+	protein_coding	tripartite motif-containing 7 [Source:MGI Symbol%3BAcc:MGI:2137353]	K12000: TRIM7; tripartite motif-containing protein 7		GO:0005634: nucleus; GO:0005634: nucleus; GO:0005737: cytoplasm; GO:0005737: cytoplasm; GO:0005737: cytoplasm; GO:0008270: zinc ion binding; GO:0016567: protein ubiquitination; GO:0016740: transferase activity; GO:0046872: metal ion binding; GO:0061630: ubiquitin protein ligase activity
ENSMUSG00000060613	Cyp2c70	23246	26760	22413	319.451	386.54	299.518	1.26424	1.77742e-12	2.89046e-10	up	19	40141797	40175777	-	protein_coding	cytochrome P450%2C family 2%2C subfamily c%2C polypeptide 70 [Source:MGI Symbol%3BAcc:MGI:2385878]	K07413: CYP2C; cytochrome P450 family 2 subfamily C [EC:1.14.14.1]	mmu00140: Steroid hormone biosynthesis - Mus musculus (house mouse); mmu00590: Arachidonic acid metabolism - Mus musculus (house mouse); mmu00591: Linoleic acid metabolism - Mus musculus (house mouse); mmu00830: Retinol metabolism - Mus musculus (house mouse); mmu01100: Metabolic pathways - Mus musculus (house mouse); mmu04726: Serotonergic synapse - Mus musculus (house mouse); mmu04750: Inflamma…	GO:0004497: monooxygenase activity; GO:0005506: iron ion binding; GO:0005737: cytoplasm; GO:0005783: endoplasmic reticulum; GO:0006082: organic acid metabolic process; GO:0006805: xenobiotic metabolic process; GO:0008392: arachidonic acid epoxygenase activity; GO:0008395: steroid hydroxylase activity; GO:0016020: membrane; GO:0016491: oxidoreductase activity; GO:0016705: oxidoreductase activity, …
ENSMUSG00000020532	Acaca	4685	5859	4146	7.4699	9.8193	6.4284	1.42743	2.25924e-12	3.62773e-10	up	11	84020498	84292477	+	protein_coding	acetyl-Coenzyme A carboxylase alpha [Source:MGI Symbol%3BAcc:MGI:108451]	K11262: ACACA; acetyl-CoA carboxylase / biotin carboxylase 1 [EC:6.4.1.2 6.3.4.14 2.1.3.15]	mmu00061: Fatty acid biosynthesis - Mus musculus (house mouse); mmu00620: Pyruvate metabolism - Mus musculus (house mouse); mmu00640: Propanoate metabolism - Mus musculus (house mouse); mmu01100: Metabolic pathways - Mus musculus (house mouse); mmu01212: Fatty acid metabolism - Mus musculus (house mouse); mmu04152: AMPK signaling pathway - Mus musculus (house mouse); mmu04910: Insulin signaling p…	GO:0000166: nucleotide binding; GO:0001650: fibrillar center; GO:0001894: tissue homeostasis; GO:0003824: catalytic activity; GO:0003989: acetyl-CoA carboxylase activity; GO:0003989: acetyl-CoA carboxylase activity; GO:0003989: acetyl-CoA carboxylase activity; GO:0003989: acetyl-CoA carboxylase activity; GO:0005515: protein binding; GO:0005524: ATP binding; GO:0005737: cytoplasm; GO:0005739: mito…
ENSMUSG00000029309	Sparcl1	707	555	524	6.5532	5.4073	4.7232	1.8243	2.27775e-12	3.62773e-10	up	5	104226977	104261599	-	protein_coding	SPARC-like 1 [Source:MGI Symbol%3BAcc:MGI:108110]			GO:0005509: calcium ion binding; GO:0005518: collagen binding; GO:0005576: extracellular region; GO:0005615: extracellular space; GO:0007165: signal transduction; GO:0045202: synapse; GO:0046872: metal ion binding; GO:0048856: anatomical structure development; GO:0050807: regulation of synapse organization; GO:0050840: extracellular matrix binding; GO:0062023: collagen-containing extracellular ma…
ENSMUSG00000020473	Aebp1	213	171	120	1.4289	1.2058	0.7828	2.81964	2.52958e-12	3.98771e-10	up	11	5811947	5822088	+	protein_coding	AE binding protein 1 [Source:MGI Symbol%3BAcc:MGI:1197012]	K21392: AEBP1; adipocyte enhancer-binding protein 1		GO:0000122: negative regulation of transcription by RNA polymerase II; GO:0000122: negative regulation of transcription by RNA polymerase II; GO:0000977: RNA polymerase II transcription regulatory region sequence-specific DNA binding; GO:0000977: RNA polymerase II transcription regulatory region sequence-specific DNA binding; GO:0000977: RNA polymerase II transcription regulatory region sequence-…
ENSMUSG00000043067	Dpy19l1	1894	1410	1475	8.1198	6.3539	6.1493	-1.31773	2.69287e-12	4.20224e-10	down	9	24323072	24414436	-	protein_coding	dpy-19-like 1 (C. elegans) [Source:MGI Symbol%3BAcc:MGI:1915685]	K24553: DPY19L; C-mannosyltransferase DPY19L [EC:2.4.1.-]		GO:0000030: mannosyltransferase activity; GO:0005637: nuclear inner membrane; GO:0016020: membrane; GO:0016021: integral component of membrane; GO:0016740: transferase activity; GO:0016757: glycosyltransferase activity; GO:0018406: protein C-linked glycosylation via 2'-alpha-mannosyl-L-tryptophan
ENSMUSG00000019122	Ccl9	2556	3095	3238	22.8515	29.0848	28.1512	1.22463	2.76604e-12	4.27326e-10	up	11	83463745	83469462	-	protein_coding	chemokine (C-C motif) ligand 9 [Source:MGI Symbol%3BAcc:MGI:104533]	K22671: CCL9; C-C motif chemokine 9	mmu04060: Cytokine-cytokine receptor interaction - Mus musculus (house mouse); mmu04061: Viral protein interaction with cytokine and cytokine receptor - Mus musculus (house mouse); mmu04062: Chemokine signaling pathway - Mus musculus (house mouse)	GO:0002548: monocyte chemotaxis; GO:0005125: cytokine activity; GO:0005576: extracellular region; GO:0005615: extracellular space; GO:0006935: chemotaxis; GO:0006954: inflammatory response; GO:0006955: immune response; GO:0007186: G protein-coupled receptor signaling pathway; GO:0008009: chemokine activity; GO:0008009: chemokine activity; GO:0030593: neutrophil chemotaxis; GO:0031726: CCR1 chemok…
ENSMUSG00000070348	Ccnd1	1282	1161	913	7.4114	7.055	5.1327	1.74448	3.9891e-12	6.10174e-10	up	7	144483668	144493662	-	protein_coding	cyclin D1 [Source:MGI Symbol%3BAcc:MGI:88313]	K04503: CCND1; G1/S-specific cyclin-D1	mmu01522: Endocrine resistance - Mus musculus (house mouse); mmu04068: FoxO signaling pathway - Mus musculus (house mouse); mmu04110: Cell cycle - Mus musculus (house mouse); mmu04115: p53 signaling pathway - Mus musculus (house mouse); mmu04151: PI3K-Akt signaling pathway - Mus musculus (house mouse); mmu04152: AMPK signaling pathway - Mus musculus (house mouse); mmu04218: Cellular senescence - …	GO:0000079: regulation of cyclin-dependent protein serine/threonine kinase activity; GO:0000082: G1/S transition of mitotic cell cycle; GO:0000082: G1/S transition of mitotic cell cycle; GO:0000082: G1/S transition of mitotic cell cycle; GO:0000122: negative regulation of transcription by RNA polymerase II; GO:0000122: negative regulation of transcription by RNA polymerase II; GO:0000307: cyclin-…
ENSMUSG00000006517	Mvd	1041	1358	1173	15.2445	20.9032	16.7042	1.99339	5.14909e-12	7.79886e-10	up	8	123160340	123170161	-	protein_coding	mevalonate (diphospho) decarboxylase [Source:MGI Symbol%3BAcc:MGI:2179327]	K01597: MVD, mvaD; diphosphomevalonate decarboxylase [EC:4.1.1.33]	mmu00900: Terpenoid backbone biosynthesis - Mus musculus (house mouse); mmu01100: Metabolic pathways - Mus musculus (house mouse)	GO:0000166: nucleotide binding; GO:0004163: diphosphomevalonate decarboxylase activity; GO:0004163: diphosphomevalonate decarboxylase activity; GO:0005524: ATP binding; GO:0005737: cytoplasm; GO:0005777: peroxisome; GO:0005782: peroxisomal matrix; GO:0005829: cytosol; GO:0005829: cytosol; GO:0005829: cytosol; GO:0006629: lipid metabolic process; GO:0006694: steroid biosynthetic process; GO:000669…
ENSMUSG00000039519	Cyp7b1	669	818	617	8.4083	10.8066	7.5411	-3.09158	5.7149e-12	8.57179e-10	down	3	18126114	18297502	-	protein_coding	cytochrome P450%2C family 7%2C subfamily b%2C polypeptide 1 [Source:MGI Symbol%3BAcc:MGI:104978]	K07430: CYP7B; 25/26-hydroxycholesterol 7alpha-hydroxylase [EC:1.14.14.29]	mmu00120: Primary bile acid biosynthesis - Mus musculus (house mouse); mmu00140: Steroid hormone biosynthesis - Mus musculus (house mouse)	GO:0004497: monooxygenase activity; GO:0005506: iron ion binding; GO:0005783: endoplasmic reticulum; GO:0006629: lipid metabolic process; GO:0006694: steroid biosynthetic process; GO:0006699: bile acid biosynthetic process; GO:0006699: bile acid biosynthetic process; GO:0007586: digestion; GO:0007613: memory; GO:0007623: circadian rhythm; GO:0008202: steroid metabolic process; GO:0008203: cholest…
ENSMUSG00000044349	Snhg11	108	121	121	0.3448	0.4061	0.3757	-1.46703	6.02499e-12	8.95e-10	down	2	158217558	158228071	+	protein_coding	small nucleolar RNA host gene 11 [Source:MGI Symbol%3BAcc:MGI:2441845]			GO:0003674: molecular_function; GO:0005575: cellular_component; GO:0008150: biological_process
ENSMUSG00000022388	Ttll8	20	10	19	0.1588	0.0835	0.1467	-3.11096	6.7269e-12	9.89751e-10	down	15	88774836	88838621	-	protein_coding	tubulin tyrosine ligase-like family%2C member 8 [Source:MGI Symbol%3BAcc:MGI:1922902]	K16608: TTLL3_8; tubulin monoglycylase TTLL3/8 [EC:6.3.2.-]		GO:0000166: nucleotide binding; GO:0003341: cilium movement; GO:0005524: ATP binding; GO:0005737: cytoplasm; GO:0005856: cytoskeleton; GO:0005874: microtubule; GO:0005929: cilium; GO:0005930: axoneme; GO:0005930: axoneme; GO:0015630: microtubule cytoskeleton; GO:0015630: microtubule cytoskeleton; GO:0016874: ligase activity; GO:0018094: protein polyglycylation; GO:0018094: protein polyglycylation…
ENSMUSG00000028967	Errfi1	49406	39250	43911	375.487	313.55	324.53	-0.97613	9.39897e-12	1.36985e-09	false	4	150938376	150953349	+	protein_coding	ERBB receptor feedback inhibitor 1 [Source:MGI Symbol%3BAcc:MGI:1921405]			GO:0005515: protein binding; GO:0005634: nucleus; GO:0005737: cytoplasm; GO:0005829: cytosol; GO:0005886: plasma membrane; GO:0007175: negative regulation of epidermal growth factor-activated receptor activity; GO:0007175: negative regulation of epidermal growth factor-activated receptor activity; GO:0016020: membrane; GO:0017124: SH3 domain binding; GO:0019900: kinase binding; GO:0019901: protei…
ENSMUSG00000027848	Olfml3	373	273	279	1.6482	1.268	1.1988	1.81963	9.86922e-12	1.42495e-09	up	3	103629538	103645317	-	protein_coding	olfactomedin-like 3 [Source:MGI Symbol%3BAcc:MGI:1914877]	K25448: OLFML1_3; olfactomedin-like protein 1/3		GO:0003674: molecular_function; GO:0005615: extracellular space; GO:0007165: signal transduction
ENSMUSG00000027890	Gstm4	2876	2932	2956	45.8665	49.1499	45.8435	0.97429	1.28035e-11	1.8315e-09	false	3	107947724	107952210	-	protein_coding	glutathione S-transferase%2C mu 4 [Source:MGI Symbol%3BAcc:MGI:95862]	K00799: GST, gst; glutathione S-transferase [EC:2.5.1.18]	mmu00480: Glutathione metabolism - Mus musculus (house mouse); mmu00980: Metabolism of xenobiotics by cytochrome P450 - Mus musculus (house mouse); mmu00982: Drug metabolism - cytochrome P450 - Mus musculus (house mouse); mmu00983: Drug metabolism - other enzymes - Mus musculus (house mouse); mmu01100: Metabolic pathways - Mus musculus (house mouse); mmu01524: Platinum drug resistance - Mus muscu…	GO:0004364: glutathione transferase activity; GO:0004364: glutathione transferase activity; GO:0004364: glutathione transferase activity; GO:0004464: leukotriene-C4 synthase activity; GO:0005737: cytoplasm; GO:0005829: cytosol; GO:0005829: cytosol; GO:0006629: lipid metabolic process; GO:0006749: glutathione metabolic process; GO:0006749: glutathione metabolic process; GO:0016740: transferase act…
ENSMUSG00000025396	Hsd17b6	12537	12098	15537	216.697	219.799	261.152	2.69823	1.70272e-11	2.41333e-09	up	10	127826805	127843480	-	protein_coding	hydroxysteroid (17-beta) dehydrogenase 6 [Source:MGI Symbol%3BAcc:MGI:1351670]	K13369: HSD17B6; 17beta-estradiol 17-dehydrogenase / all-trans-retinol dehydrogenase (NAD+) / 3alpha(17beta)-hydroxysteroid dehydrogenase (NAD+) [EC:1.1.1.62 1.1.1.105 1.1.1.239]	mmu00140: Steroid hormone biosynthesis - Mus musculus (house mouse); mmu00830: Retinol metabolism - Mus musculus (house mouse); mmu01100: Metabolic pathways - Mus musculus (house mouse); mmu01240: Biosynthesis of cofactors - Mus musculus (house mouse)	GO:0004303: estradiol 17-beta-dehydrogenase activity; GO:0004303: estradiol 17-beta-dehydrogenase activity; GO:0004745: NAD-retinol dehydrogenase activity; GO:0004745: NAD-retinol dehydrogenase activity; GO:0005768: endosome; GO:0005783: endoplasmic reticulum; GO:0006629: lipid metabolic process; GO:0008202: steroid metabolic process; GO:0008202: steroid metabolic process; GO:0016020: membrane; G…
ENSMUSG00000036585	Fgf1	2764	2227	2698	13.7736	11.6649	13.0743	-1.00491	1.90846e-11	2.68035e-09	down	18	38971726	39062525	-	protein_coding	fibroblast growth factor 1 [Source:MGI Symbol%3BAcc:MGI:95515]	K18496: FGF1; fibroblast growth factor 1	mmu04010: MAPK signaling pathway - Mus musculus (house mouse); mmu04014: Ras signaling pathway - Mus musculus (house mouse); mmu04015: Rap1 signaling pathway - Mus musculus (house mouse); mmu04020: Calcium signaling pathway - Mus musculus (house mouse); mmu04151: PI3K-Akt signaling pathway - Mus musculus (house mouse); mmu04390: Hippo signaling pathway - Mus musculus (house mouse); mmu04810: Regu…	GO:0001525: angiogenesis; GO:0001759: organ induction; GO:0001934: positive regulation of protein phosphorylation; GO:0001934: positive regulation of protein phosphorylation; GO:0005104: fibroblast growth factor receptor binding; GO:0005104: fibroblast growth factor receptor binding; GO:0005178: integrin binding; GO:0005515: protein binding; GO:0005576: extracellular region; GO:0005576: extracell…
ENSMUSG00000001506	Col1a1	1507	1292	1239	6.251	5.6332	4.9978	3.10009	1.9647e-11	2.73447e-09	up	11	94827050	94843868	+	protein_coding	collagen%2C type I%2C alpha 1 [Source:MGI Symbol%3BAcc:MGI:88467]	K06236: COL1A; collagen type I alpha	mmu04151: PI3K-Akt signaling pathway - Mus musculus (house mouse); mmu04510: Focal adhesion - Mus musculus (house mouse); mmu04512: ECM-receptor interaction - Mus musculus (house mouse); mmu04611: Platelet activation - Mus musculus (house mouse); mmu04926: Relaxin signaling pathway - Mus musculus (house mouse); mmu04933: AGE-RAGE signaling pathway in diabetic complications - Mus musculus (house m…	GO:0001501: skeletal system development; GO:0001501: skeletal system development; GO:0001501: skeletal system development; GO:0001503: ossification; GO:0001568: blood vessel development; GO:0001568: blood vessel development; GO:0001568: blood vessel development; GO:0001649: osteoblast differentiation; GO:0001957: intramembranous ossification; GO:0001958: endochondral ossification; GO:0002020: pro…
ENSMUSG00000042436	Mfap4	202	172	302	2.8611	2.5608	4.1597	2.82787	2.44733e-11	3.37578e-09	up	11	61376257	61379726	+	protein_coding	microfibrillar-associated protein 4 [Source:MGI Symbol%3BAcc:MGI:1342276]	K25409: MFAP4; microfibrillar-associated protein 4		GO:0001527: microfibril; GO:0001867: complement activation, lectin pathway; GO:0003823: antigen binding; GO:0005102: signaling receptor binding; GO:0005201: extracellular matrix structural constituent; GO:0005576: extracellular region; GO:0005615: extracellular space; GO:0007155: cell adhesion; GO:0009650: UV protection; GO:0010712: regulation of collagen metabolic process; GO:0048251: elastic fi…
ENSMUSG00000025229	Pitx3	115	54	78	2.0516	1.0126	1.3532	-3.04686	2.48282e-11	3.39443e-09	down	19	46124124	46136765	-	protein_coding	paired-like homeodomain transcription factor 3 [Source:MGI Symbol%3BAcc:MGI:1100498]	K09357: PITX3; paired-like homeodomain transcription factor 3		GO:0000785: chromatin; GO:0000978: RNA polymerase II cis-regulatory region sequence-specific DNA binding; GO:0000978: RNA polymerase II cis-regulatory region sequence-specific DNA binding; GO:0000981: DNA-binding transcription factor activity, RNA polymerase II-specific; GO:0001228: DNA-binding transcription activator activity, RNA polymerase II-specific; GO:0001228: DNA-binding transcription act…	Homeobox
ENSMUSG00000041939	Mvk	1232	1458	1283	12.538	15.5965	12.6973	1.84294	2.59296e-11	3.48336e-09	up	5	114582330	114598652	+	protein_coding	mevalonate kinase [Source:MGI Symbol%3BAcc:MGI:107624]	K00869: MVK, mvaK1; mevalonate kinase [EC:2.7.1.36]	mmu00900: Terpenoid backbone biosynthesis - Mus musculus (house mouse); mmu01100: Metabolic pathways - Mus musculus (house mouse); mmu04146: Peroxisome - Mus musculus (house mouse)	GO:0000166: nucleotide binding; GO:0000287: magnesium ion binding; GO:0003729: mRNA binding; GO:0004496: mevalonate kinase activity; GO:0004496: mevalonate kinase activity; GO:0004496: mevalonate kinase activity; GO:0005524: ATP binding; GO:0005737: cytoplasm; GO:0005777: peroxisome; GO:0005829: cytosol; GO:0005829: cytosol; GO:0006629: lipid metabolic process; GO:0006694: steroid biosynthetic pr…
ENSMUSG00000048126	Col6a3	1056	817	704	2.4031	1.9542	1.5579	2.08575	2.58255e-11	3.48336e-09	up	1	90693645	90771693	-	protein_coding	collagen%2C type VI%2C alpha 3 [Source:MGI Symbol%3BAcc:MGI:88461]	K06238: COL6A; collagen type VI alpha	mmu04151: PI3K-Akt signaling pathway - Mus musculus (house mouse); mmu04510: Focal adhesion - Mus musculus (house mouse); mmu04512: ECM-receptor interaction - Mus musculus (house mouse); mmu04974: Protein digestion and absorption - Mus musculus (house mouse); mmu05165: Human papillomavirus infection - Mus musculus (house mouse)	GO:0005581: collagen trimer; GO:0005615: extracellular space; GO:0005615: extracellular space; GO:0030020: extracellular matrix structural constituent conferring tensile strength; GO:0031012: extracellular matrix; GO:0031012: extracellular matrix; GO:0042383: sarcolemma; GO:0062023: collagen-containing extracellular matrix; GO:0062023: collagen-containing extracellular matrix
ENSMUSG00000053977	Cd8a	225	75	230	1.6841	0.5901	1.6741	3.51183	2.65975e-11	3.54228e-09	up	6	71350411	71356157	+	protein_coding	CD8 antigen%2C alpha chain [Source:MGI Symbol%3BAcc:MGI:88346]	K06458: CD8A; T-cell surface glycoprotein CD8 alpha chain	mmu04514: Cell adhesion molecules - Mus musculus (house mouse); mmu04612: Antigen processing and presentation - Mus musculus (house mouse); mmu04640: Hematopoietic cell lineage - Mus musculus (house mouse); mmu04660: T cell receptor signaling pathway - Mus musculus (house mouse); mmu05135: Yersinia infection - Mus musculus (house mouse); mmu05340: Primary immunodeficiency - Mus musculus (house mo…	GO:0002250: adaptive immune response; GO:0002376: immune system process; GO:0002456: T cell mediated immunity; GO:0002456: T cell mediated immunity; GO:0005515: protein binding; GO:0005886: plasma membrane; GO:0005886: plasma membrane; GO:0007166: cell surface receptor signaling pathway; GO:0007166: cell surface receptor signaling pathway; GO:0009897: external side of plasma membrane; GO:0009897:…
ENSMUSG00000030278	Cidec	103	85	118	1.5108	1.3105	1.6831	-1.82367	2.80847e-11	3.70838e-09	down	6	113401595	113412721	-	protein_coding	cell death-inducing DFFA-like effector c [Source:MGI Symbol%3BAcc:MGI:95585]	K25878: CIDEC; cell death activator CIDE-C	mmu04923: Regulation of lipolysis in adipocytes - Mus musculus (house mouse)	GO:0005634: nucleus; GO:0005783: endoplasmic reticulum; GO:0005811: lipid droplet; GO:0005829: cytosol; GO:0005829: cytosol; GO:0006869: lipid transport; GO:0006915: apoptotic process; GO:0034389: lipid droplet organization; GO:0042981: regulation of apoptotic process; GO:0097194: execution phase of apoptosis
ENSMUSG00000069520	Tmem19	2894	2629	2671	21.4379	20.4704	19.2408	-1.23854	2.91934e-11	3.82211e-09	down	10	115175579	115198406	-	protein_coding	transmembrane protein 19 [Source:MGI Symbol%3BAcc:MGI:1914476]			GO:0003674: molecular_function; GO:0008150: biological_process; GO:0016020: membrane; GO:0016021: integral component of membrane
ENSMUSG00000084923	Gm15611	65	34	24	4.3584	2.3963	1.5649	-3.21177	3.42084e-11	4.44105e-09	down	5	9048402	9049669	-	lncRNA	predicted gene 15611 [Source:MGI Symbol%3BAcc:MGI:3783057]
ENSMUSG00000078817	Nlrp12	1746	1384	1863	6.2998	5.2489	6.5367	-1.27166	3.44959e-11	4.44106e-09	down	7	3267458	3298370	-	protein_coding	NLR family%2C pyrin domain containing 12 [Source:MGI Symbol%3BAcc:MGI:2676630]	K20865: NLRP12; NACHT, LRR and PYD domains-containing protein 12	mmu04621: NOD-like receptor signaling pathway - Mus musculus (house mouse)	GO:0000166: nucleotide binding; GO:0001818: negative regulation of cytokine production; GO:0005515: protein binding; GO:0005524: ATP binding; GO:0005737: cytoplasm; GO:0005737: cytoplasm; GO:0009968: negative regulation of signal transduction; GO:0031953: negative regulation of protein autophosphorylation; GO:0032088: negative regulation of NF-kappaB transcription factor activity; GO:0032692: neg…
ENSMUSG00000052336	Cx3cr1	153	146	119	0.9246	0.9274	0.6993	2.30154	3.50877e-11	4.47991e-09	up	9	119730682	119898945	-	protein_coding	chemokine (C-X3-C motif) receptor 1 [Source:MGI Symbol%3BAcc:MGI:1333815]	K04192: CX3CR1; CX3C chemokine receptor 1	mmu04060: Cytokine-cytokine receptor interaction - Mus musculus (house mouse); mmu04061: Viral protein interaction with cytokine and cytokine receptor - Mus musculus (house mouse); mmu04062: Chemokine signaling pathway - Mus musculus (house mouse)	GO:0001774: microglial cell activation; GO:0002052: positive regulation of neuroblast proliferation; GO:0002250: adaptive immune response; GO:0002376: immune system process; GO:0002881: negative regulation of chronic inflammatory response to non-antigenic stimulus; GO:0002931: response to ischemia; GO:0004896: cytokine receptor activity; GO:0004930: G protein-coupled receptor activity; GO:0004950…
ENSMUSG00000056091	St3gal5	8450	6803	8124	87.8674	74.3573	82.15	-1.11414	3.54789e-11	4.49274e-09	down	6	72074576	72131555	+	protein_coding	ST3 beta-galactoside alpha-2%2C3-sialyltransferase 5 [Source:MGI Symbol%3BAcc:MGI:1339963]	K03370: ST3GAL5; lactosylceramide alpha-2,3-sialyltransferase (sialyltransferase 9) [EC:2.4.3.9]	mmu00604: Glycosphingolipid biosynthesis - ganglio series - Mus musculus (house mouse); mmu01100: Metabolic pathways - Mus musculus (house mouse)	GO:0005794: Golgi apparatus; GO:0006486: protein glycosylation; GO:0006629: lipid metabolic process; GO:0008373: sialyltransferase activity; GO:0016020: membrane; GO:0016021: integral component of membrane; GO:0016740: transferase activity; GO:0016757: glycosyltransferase activity; GO:0047291: lactosylceramide alpha-2,3-sialyltransferase activity; GO:0047291: lactosylceramide alpha-2,3-sialyltran…
ENSMUSG00000066153	Mup21	204	281	327	8.2032	11.8771	12.7869	-3.17469	3.66801e-11	4.60708e-09	down	4	62066169	62069100	-	protein_coding	major urinary protein 21 [Source:MGI Symbol%3BAcc:MGI:3650630]			GO:0003674: molecular_function; GO:0005549: odorant binding; GO:0005615: extracellular space; GO:0005615: extracellular space; GO:0008150: biological_process
ENSMUSG00000096688	Mup17	454	1058	1944	13.3327	32.6587	55.5167	-6.0181	3.85583e-11	4.80393e-09	down	4	61510166	61514108	-	protein_coding	major urinary protein 17 [Source:MGI Symbol%3BAcc:MGI:3705217]			GO:0003674: molecular_function; GO:0005549: odorant binding; GO:0005550: pheromone binding; GO:0005576: extracellular region; GO:0005615: extracellular space; GO:0005615: extracellular space; GO:0008150: biological_process; GO:0036094: small molecule binding
ENSMUSG00000067276	Capn6	217	144	117	0.7579	0.5286	0.3974	2.77646	3.97463e-11	4.91233e-09	up	X	142585227	142610410	-	protein_coding	calpain 6 [Source:MGI Symbol%3BAcc:MGI:1100850]	K08575: CAPN6; calpain-6 [EC:3.4.22.-]		GO:0001578: microtubule bundle formation; GO:0005515: protein binding; GO:0005737: cytoplasm; GO:0005856: cytoskeleton; GO:0005874: microtubule; GO:0005876: spindle microtubule; GO:0008017: microtubule binding; GO:0048471: perinuclear region of cytoplasm; GO:0051493: regulation of cytoskeleton organization
ENSMUSG00000004035	Gstm7	2642	2935	3189	44.9244	52.4577	52.7315	1.0846	4.10407e-11	5.03205e-09	up	3	107833650	107839133	-	protein_coding	glutathione S-transferase%2C mu 7 [Source:MGI Symbol%3BAcc:MGI:1915562]	K00799: GST, gst; glutathione S-transferase [EC:2.5.1.18]	mmu00480: Glutathione metabolism - Mus musculus (house mouse); mmu00980: Metabolism of xenobiotics by cytochrome P450 - Mus musculus (house mouse); mmu00982: Drug metabolism - cytochrome P450 - Mus musculus (house mouse); mmu00983: Drug metabolism - other enzymes - Mus musculus (house mouse); mmu01100: Metabolic pathways - Mus musculus (house mouse); mmu01524: Platinum drug resistance - Mus muscu…	GO:0004364: glutathione transferase activity; GO:0004364: glutathione transferase activity; GO:0004602: glutathione peroxidase activity; GO:0005102: signaling receptor binding; GO:0005504: fatty acid binding; GO:0005737: cytoplasm; GO:0005829: cytosol; GO:0006749: glutathione metabolic process; GO:0006749: glutathione metabolic process; GO:0010880: regulation of release of sequestered calcium ion…
ENSMUSG00000028906	Epb41	3628	3505	3524	6.0275	6.1208	5.6934	-1.04633	5.04003e-11	6.13098e-09	down	4	131650724	131802632	-	protein_coding	erythrocyte membrane protein band 4.1 [Source:MGI Symbol%3BAcc:MGI:95401]	K06107: EPB41; erythrocyte membrane protein band 4.1		GO:0003779: actin binding; GO:0005198: structural molecule activity; GO:0005515: protein binding; GO:0005516: calmodulin binding; GO:0005545: 1-phosphatidylinositol binding; GO:0005634: nucleus; GO:0005737: cytoplasm; GO:0005829: cytosol; GO:0005856: cytoskeleton; GO:0005886: plasma membrane; GO:0005886: plasma membrane; GO:0005938: cell cortex; GO:0007049: cell cycle; GO:0008022: protein C-termi…
ENSMUSG00000026348	Acmsd	1120	1080	1073	10.7701	10.9163	10.0338	1.12836	5.82441e-11	7.02979e-09	up	1	127657150	127695715	+	protein_coding	amino carboxymuconate semialdehyde decarboxylase [Source:MGI Symbol%3BAcc:MGI:2386323]	K03392: ACMSD; aminocarboxymuconate-semialdehyde decarboxylase [EC:4.1.1.45]	mmu00380: Tryptophan metabolism - Mus musculus (house mouse); mmu01100: Metabolic pathways - Mus musculus (house mouse)	GO:0001760: aminocarboxymuconate-semialdehyde decarboxylase activity; GO:0005737: cytoplasm; GO:0005829: cytosol; GO:0005829: cytosol; GO:0006569: tryptophan catabolic process; GO:0007568: aging; GO:0008270: zinc ion binding; GO:0016787: hydrolase activity; GO:0016829: lyase activity; GO:0016831: carboxy-lyase activity; GO:0019748: secondary metabolic process; GO:0046872: metal ion binding; GO:00…
ENSMUSG00000032271	Nnmt	2009	1127	1944	34.7028	20.4626	32.6548	-2.58176	6.64711e-11	7.96055e-09	down	9	48503177	48516453	-	protein_coding	nicotinamide N-methyltransferase [Source:MGI Symbol%3BAcc:MGI:1099443]	K00541: NNMT; nicotinamide N-methyltransferase [EC:2.1.1.1]	mmu00760: Nicotinate and nicotinamide metabolism - Mus musculus (house mouse); mmu01100: Metabolic pathways - Mus musculus (house mouse)	GO:0005737: cytoplasm; GO:0005829: cytosol; GO:0005829: cytosol; GO:0006769: nicotinamide metabolic process; GO:0006769: nicotinamide metabolic process; GO:0008112: nicotinamide N-methyltransferase activity; GO:0008112: nicotinamide N-methyltransferase activity; GO:0008112: nicotinamide N-methyltransferase activity; GO:0008168: methyltransferase activity; GO:0008170: N-methyltransferase activity;…
ENSMUSG00000029426	Scarb2	5651	4906	4724	24.4771	22.3365	19.8981	-0.94224	7.07355e-11	8.3521e-09	false	5	92589173	92654692	-	protein_coding	scavenger receptor class B%2C member 2 [Source:MGI Symbol%3BAcc:MGI:1196458]	K12384: SCARB2, LIMP2, CD36L2; lysosome membrane protein 2	mmu04142: Lysosome - Mus musculus (house mouse)	GO:0001786: phosphatidylserine binding; GO:0005044: scavenger receptor activity; GO:0005044: scavenger receptor activity; GO:0005515: protein binding; GO:0005737: cytoplasm; GO:0005764: lysosome; GO:0005765: lysosomal membrane; GO:0005886: plasma membrane; GO:0005886: plasma membrane; GO:0006622: protein targeting to lysosome; GO:0006622: protein targeting to lysosome; GO:0006622: protein targeti…
ENSMUSG00000074398	Gm15441	27	15	36	0.3651	0.2132	0.4734	-3.56598	7.08218e-11	8.3521e-09	down	3	96463071	96474117	-	lncRNA	predicted gene 15441 [Source:MGI Symbol%3BAcc:MGI:3641753]			GO:0003674: molecular_function; GO:0005575: cellular_component; GO:0008150: biological_process
ENSMUSG00000058454	Dhcr7	5439	7527	5271	25.4543	37.0267	23.9884	1.73133	8.3296e-11	9.74879e-09	up	7	143376882	143402147	+	protein_coding	7-dehydrocholesterol reductase [Source:MGI Symbol%3BAcc:MGI:1298378]	K00213: DHCR7; 7-dehydrocholesterol reductase [EC:1.3.1.21]	mmu00100: Steroid biosynthesis - Mus musculus (house mouse); mmu01100: Metabolic pathways - Mus musculus (house mouse)	GO:0001568: blood vessel development; GO:0005640: nuclear outer membrane; GO:0005783: endoplasmic reticulum; GO:0006629: lipid metabolic process; GO:0006694: steroid biosynthetic process; GO:0006695: cholesterol biosynthetic process; GO:0006695: cholesterol biosynthetic process; GO:0008202: steroid metabolic process; GO:0008203: cholesterol metabolic process; GO:0009791: post-embryonic developmen…
ENSMUSG00000036446	Lum	1001	646	431	11.1317	7.5512	4.6609	2.11389	9.41647e-11	1.0938e-08	up	10	97400990	97408565	+	protein_coding	lumican [Source:MGI Symbol%3BAcc:MGI:109347]	K08122: LUM; lumican	mmu05205: Proteoglycans in cancer - Mus musculus (house mouse)	GO:0005518: collagen binding; GO:0005518: collagen binding; GO:0005576: extracellular region; GO:0005583: fibrillar collagen trimer; GO:0005615: extracellular space; GO:0007601: visual perception; GO:0030021: extracellular matrix structural constituent conferring compression resistance; GO:0030199: collagen fibril organization; GO:0031012: extracellular matrix; GO:0031012: extracellular matrix; G…
ENSMUSG00000028494	Plin2	23728	14145	21825	183.928	115.25	164.516	-1.4008	1.05028e-10	1.21087e-08	down	4	86566623	86588297	-	protein_coding	perilipin 2 [Source:MGI Symbol%3BAcc:MGI:87920]	K17284: PLIN2, ADRP; perilipin-2	mmu03320: PPAR signaling pathway - Mus musculus (house mouse)	GO:0005515: protein binding; GO:0005634: nucleus; GO:0005737: cytoplasm; GO:0005811: lipid droplet; GO:0005811: lipid droplet; GO:0005811: lipid droplet; GO:0005811: lipid droplet; GO:0005829: cytosol; GO:0005829: cytosol; GO:0005829: cytosol; GO:0005886: plasma membrane; GO:0010890: positive regulation of sequestering of triglyceride; GO:0015909: long-chain fatty acid transport; GO:0016020: memb…
ENSMUSG00000075256	Cerkl	45	32	26	0.2318	0.1733	0.1303	-2.11932	1.05838e-10	1.21118e-08	down	2	79160887	79287129	-	protein_coding	ceramide kinase-like [Source:MGI Symbol%3BAcc:MGI:3037816]	K19602: CERKL; ceramide kinase-like protein		GO:0001727: lipid kinase activity; GO:0001750: photoreceptor outer segment; GO:0001917: photoreceptor inner segment; GO:0005634: nucleus; GO:0005654: nucleoplasm; GO:0005730: nucleolus; GO:0005737: cytoplasm; GO:0005737: cytoplasm; GO:0005783: endoplasmic reticulum; GO:0005794: Golgi apparatus; GO:0005829: cytosol; GO:0006665: sphingolipid metabolic process; GO:0016310: phosphorylation; GO:003014…
ENSMUSG00000028680	Plk3	3007	2076	3249	32.3431	23.4708	33.9832	-1.54881	1.11535e-10	1.26699e-08	down	4	116985852	116991160	-	protein_coding	polo like kinase 3 [Source:MGI Symbol%3BAcc:MGI:109604]	K08862: PLK3, CNK; polo-like kinase 3 [EC:2.7.11.21]	mmu04068: FoxO signaling pathway - Mus musculus (house mouse); mmu04625: C-type lectin receptor signaling pathway - Mus musculus (house mouse); mmu05152: Tuberculosis - Mus musculus (house mouse)	GO:0000082: G1/S transition of mitotic cell cycle; GO:0000122: negative regulation of transcription by RNA polymerase II; GO:0000166: nucleotide binding; GO:0000278: mitotic cell cycle; GO:0000302: response to reactive oxygen species; GO:0000785: chromatin; GO:0000922: spindle pole; GO:0002039: p53 binding; GO:0004672: protein kinase activity; GO:0004674: protein serine/threonine kinase activity;…
ENSMUSG00000028364	Tnc	100	156	93	0.3503	0.5744	0.3168	3.13197	1.41027e-10	1.59031e-08	up	4	63878022	63965252	-	protein_coding	tenascin C [Source:MGI Symbol%3BAcc:MGI:101922]	K06252: TN; tenascin	mmu04151: PI3K-Akt signaling pathway - Mus musculus (house mouse); mmu04510: Focal adhesion - Mus musculus (house mouse); mmu04512: ECM-receptor interaction - Mus musculus (house mouse); mmu05165: Human papillomavirus infection - Mus musculus (house mouse); mmu05206: MicroRNAs in cancer - Mus musculus (house mouse)	GO:0001558: regulation of cell growth; GO:0001968: fibronectin binding; GO:0002009: morphogenesis of an epithelium; GO:0005201: extracellular matrix structural constituent; GO:0005576: extracellular region; GO:0005576: extracellular region; GO:0005604: basement membrane; GO:0005614: interstitial matrix; GO:0005615: extracellular space; GO:0007155: cell adhesion; GO:0007162: negative regulation of…
ENSMUSG00000030257	Srgap3	30	29	32	0.0829	0.0842	0.086	-1.98295	1.44859e-10	1.62168e-08	down	6	112694932	112924227	-	protein_coding	SLIT-ROBO Rho GTPase activating protein 3 [Source:MGI Symbol%3BAcc:MGI:2152938]	K07526: SRGAP; SLIT-ROBO Rho GTPase activating protein	mmu04360: Axon guidance - Mus musculus (house mouse)	GO:0005096: GTPase activator activity; GO:0005515: protein binding; GO:0005737: cytoplasm; GO:0007165: signal transduction; GO:0030336: negative regulation of cell migration
ENSMUSG00000041237	Pklr	5877	8425	5359	49.4411	74.4996	43.8412	1.44955	1.48581e-10	1.65138e-08	up	3	89043449	89054091	+	protein_coding	pyruvate kinase liver and red blood cell [Source:MGI Symbol%3BAcc:MGI:97604]	K12406: PKLR; pyruvate kinase isozymes R/L [EC:2.7.1.40]	mmu00010: Glycolysis / Gluconeogenesis - Mus musculus (house mouse); mmu00620: Pyruvate metabolism - Mus musculus (house mouse); mmu01100: Metabolic pathways - Mus musculus (house mouse); mmu01200: Carbon metabolism - Mus musculus (house mouse); mmu01230: Biosynthesis of amino acids - Mus musculus (house mouse); mmu04910: Insulin signaling pathway - Mus musculus (house mouse); mmu04930: Type II d…	GO:0000166: nucleotide binding; GO:0000287: magnesium ion binding; GO:0003824: catalytic activity; GO:0004743: pyruvate kinase activity; GO:0004743: pyruvate kinase activity; GO:0004743: pyruvate kinase activity; GO:0005524: ATP binding; GO:0005737: cytoplasm; GO:0005737: cytoplasm; GO:0005829: cytosol; GO:0005829: cytosol; GO:0005886: plasma membrane; GO:0005975: carbohydrate metabolic process; …
ENSMUSG00000017466	Timp2	1173	1023	914	7.5385	6.9105	5.7121	1.42747	1.60518e-10	1.77132e-08	up	11	118191887	118246566	-	protein_coding	tissue inhibitor of metalloproteinase 2 [Source:MGI Symbol%3BAcc:MGI:98753]	K22583: TIMP2; metalloproteinase inhibitor 2		GO:0002020: protease binding; GO:0002020: protease binding; GO:0004857: enzyme inhibitor activity; GO:0005178: integrin binding; GO:0005178: integrin binding; GO:0005576: extracellular region; GO:0005604: basement membrane; GO:0005615: extracellular space; GO:0005615: extracellular space; GO:0005615: extracellular space; GO:0008047: enzyme activator activity; GO:0008191: metalloendopeptidase inhi…
ENSMUSG00000022440	C1qtnf6	150	109	129	1.5113	1.1543	1.2639	2.26555	1.65873e-10	1.81743e-08	up	15	78407546	78415616	-	protein_coding	C1q and tumor necrosis factor related protein 6 [Source:MGI Symbol%3BAcc:MGI:1919959]	K19470: C1QTNF1_6_8; complement C1q tumor necrosis factor-related protein 1/6/8		GO:0005515: protein binding; GO:0005576: extracellular region; GO:0005581: collagen trimer; GO:0005615: extracellular space; GO:0005615: extracellular space; GO:0032991: protein-containing complex; GO:0042802: identical protein binding
ENSMUSG00000045094	Arhgef37	856	772	795	3.9699	3.7633	3.5854	1.02298	1.69916e-10	1.84861e-08	up	18	61624728	61669665	-	protein_coding	Rho guanine nucleotide exchange factor (GEF) 37 [Source:MGI Symbol%3BAcc:MGI:3045339]	K20710: ARHGEF37; Rho guanine nucleotide exchange factor 37		GO:0005085: guanyl-nucleotide exchange factor activity; GO:0005575: cellular_component; GO:0005737: cytoplasm
ENSMUSG00000000915	Hip1r	920	916	976	3.3988	3.557	3.5063	-1.41884	1.73425e-10	1.8736e-08	down	5	124111691	124143621	+	protein_coding	huntingtin interacting protein 1 related [Source:MGI Symbol%3BAcc:MGI:1352504]	K20040: HIP1R, SLA2; huntingtin-interacting protein 1-related protein		GO:0003779: actin binding; GO:0005515: protein binding; GO:0005543: phospholipid binding; GO:0005546: phosphatidylinositol-4,5-bisphosphate binding; GO:0005547: phosphatidylinositol-3,4,5-trisphosphate binding; GO:0005737: cytoplasm; GO:0005829: cytosol; GO:0005856: cytoskeleton; GO:0005886: plasma membrane; GO:0005905: clathrin-coated pit; GO:0005938: cell cortex; GO:0006897: endocytosis; GO:000…
ENSMUSG00000029575	Mmab	1036	1418	1121	7.6848	11.0561	8.0862	1.36202	2.24303e-10	2.40643e-08	up	5	114569095	114582121	-	protein_coding	methylmalonic aciduria (cobalamin deficiency) cblB type homolog (human) [Source:MGI Symbol%3BAcc:MGI:1924947]	K00798: MMAB, pduO; cob(I)alamin adenosyltransferase [EC:2.5.1.17]	mmu00860: Porphyrin metabolism - Mus musculus (house mouse); mmu01100: Metabolic pathways - Mus musculus (house mouse); mmu01240: Biosynthesis of cofactors - Mus musculus (house mouse)	GO:0000166: nucleotide binding; GO:0005524: ATP binding; GO:0005739: mitochondrion; GO:0008817: cob(I)yrinic acid a,c-diamide adenosyltransferase activity; GO:0008817: cob(I)yrinic acid a,c-diamide adenosyltransferase activity; GO:0009235: cobalamin metabolic process; GO:0009235: cobalamin metabolic process; GO:0016740: transferase activity; GO:0016765: transferase activity, transferring alkyl or…
ENSMUSG00000089704	Galnt2	1408	1269	1214	8.9515	8.4802	7.5055	-1.11899	2.29361e-10	2.44372e-08	down	8	124958130	125072463	+	protein_coding	polypeptide N-acetylgalactosaminyltransferase 2 [Source:MGI Symbol%3BAcc:MGI:894694]	K00710: GALNT; polypeptide N-acetylgalactosaminyltransferase [EC:2.4.1.41]	mmu00512: Mucin type O-glycan biosynthesis - Mus musculus (house mouse); mmu00514: Other types of O-glycan biosynthesis - Mus musculus (house mouse); mmu01100: Metabolic pathways - Mus musculus (house mouse)	GO:0004653: polypeptide N-acetylgalactosaminyltransferase activity; GO:0004653: polypeptide N-acetylgalactosaminyltransferase activity; GO:0004653: polypeptide N-acetylgalactosaminyltransferase activity; GO:0005576: extracellular region; GO:0005794: Golgi apparatus; GO:0005794: Golgi apparatus; GO:0005795: Golgi stack; GO:0005796: Golgi lumen; GO:0006493: protein O-linked glycosylation; GO:000649…
ENSMUSG00000022462	Slc38a2	5565	3983	4268	17.1416	12.8958	12.7843	-1.33324	2.32518e-10	2.46039e-08	down	15	96585273	96597611	-	protein_coding	solute carrier family 38%2C member 2 [Source:MGI Symbol%3BAcc:MGI:1915010]	K14207: SLC38A2, SNAT2; solute carrier family 38 (sodium-coupled neutral amino acid transporter), member 2	mmu04724: Glutamatergic synapse - Mus musculus (house mouse); mmu04727: GABAergic synapse - Mus musculus (house mouse); mmu04974: Protein digestion and absorption - Mus musculus (house mouse)	GO:0003333: amino acid transmembrane transport; GO:0003333: amino acid transmembrane transport; GO:0005295: neutral amino acid:sodium symporter activity; GO:0005737: cytoplasm; GO:0005886: plasma membrane; GO:0005886: plasma membrane; GO:0005887: integral component of plasma membrane; GO:0005903: brush border; GO:0006811: ion transport; GO:0006814: sodium ion transport; GO:0006865: amino acid tra…
ENSMUSG00000001288	Rarg	487	654	552	3.1114	4.392	3.4295	1.49032	2.47818e-10	2.60445e-08	up	15	102143373	102165952	-	protein_coding	retinoic acid receptor%2C gamma [Source:MGI Symbol%3BAcc:MGI:97858]	K08529: RARG, NR1B3; retinoic acid receptor gamma		GO:0000122: negative regulation of transcription by RNA polymerase II; GO:0000122: negative regulation of transcription by RNA polymerase II; GO:0000785: chromatin; GO:0000978: RNA polymerase II cis-regulatory region sequence-specific DNA binding; GO:0001843: neural tube closure; GO:0002063: chondrocyte development; GO:0002068: glandular epithelial cell development; GO:0003417: growth plate carti…	THR-like
ENSMUSG00000042213	Zfand4	1080	1082	1046	7.0321	7.4052	6.6231	1.28098	2.53463e-10	2.64578e-08	up	6	116241183	116307263	+	protein_coding	zinc finger%2C AN1-type domain 4 [Source:MGI Symbol%3BAcc:MGI:1914742]	K12163: ZFAND4, ANUBL1; AN1-type zinc finger protein 4		GO:0003674: molecular_function; GO:0005575: cellular_component; GO:0008150: biological_process; GO:0008270: zinc ion binding; GO:0046872: metal ion binding
ENSMUSG00000024063	Lbh	800	866	650	6.7804	7.715	5.3573	1.42449	2.65741e-10	2.74258e-08	up	17	73225300	73248942	+	protein_coding	limb-bud and heart [Source:MGI Symbol%3BAcc:MGI:1925139]			GO:0005634: nucleus; GO:0005634: nucleus; GO:0005634: nucleus; GO:0005737: cytoplasm; GO:0006355: regulation of DNA-templated transcription; GO:0007275: multicellular organism development; GO:0010468: regulation of gene expression; GO:0030879: mammary gland development; GO:0032991: protein-containing complex; GO:0033147: negative regulation of intracellular estrogen receptor signaling pathway; GO…
ENSMUSG00000026042	Col5a2	428	379	280	1.2148	1.1308	0.7729	1.78129	2.66287e-10	2.74258e-08	up	1	45413481	45542442	-	protein_coding	collagen%2C type V%2C alpha 2 [Source:MGI Symbol%3BAcc:MGI:88458]	K19721: COL5AS; collagen type V/XI/XXIV/XXVII, alpha	mmu04974: Protein digestion and absorption - Mus musculus (house mouse)	GO:0001501: skeletal system development; GO:0005201: extracellular matrix structural constituent; GO:0005576: extracellular region; GO:0005581: collagen trimer; GO:0005588: collagen type V trimer; GO:0005588: collagen type V trimer; GO:0005592: collagen type XI trimer; GO:0005615: extracellular space; GO:0005615: extracellular space; GO:0030020: extracellular matrix structural constituent conferr…
ENSMUSG00000032092	Mpzl2	2540	2348	2790	9.9235	9.6423	10.5999	0.94879	2.72003e-10	2.78289e-08	false	9	44951097	44965313	+	protein_coding	myelin protein zero-like 2 [Source:MGI Symbol%3BAcc:MGI:1289160]			GO:0003674: molecular_function; GO:0005886: plasma membrane; GO:0005886: plasma membrane; GO:0007155: cell adhesion; GO:0016020: membrane; GO:0016021: integral component of membrane; GO:0033077: T cell differentiation in thymus; GO:0098609: cell-cell adhesion; GO:0098609: cell-cell adhesion
ENSMUSG00000024900	Cpt1a	14663	12407	10933	52.2344	46.4571	37.8739	-1.05839	3.12402e-10	3.17519e-08	down	19	3372334	3435733	+	protein_coding	carnitine palmitoyltransferase 1a%2C liver [Source:MGI Symbol%3BAcc:MGI:1098296]	K08765: CPT1A; carnitine O-palmitoyltransferase 1, liver isoform [EC:2.3.1.21]	mmu00071: Fatty acid degradation - Mus musculus (house mouse); mmu01212: Fatty acid metabolism - Mus musculus (house mouse); mmu03320: PPAR signaling pathway - Mus musculus (house mouse); mmu04152: AMPK signaling pathway - Mus musculus (house mouse); mmu04714: Thermogenesis - Mus musculus (house mouse); mmu04920: Adipocytokine signaling pathway - Mus musculus (house mouse); mmu04922: Glucagon sig…	GO:0001676: long-chain fatty acid metabolic process; GO:0004095: carnitine O-palmitoyltransferase activity; GO:0004095: carnitine O-palmitoyltransferase activity; GO:0004095: carnitine O-palmitoyltransferase activity; GO:0005515: protein binding; GO:0005739: mitochondrion; GO:0005739: mitochondrion; GO:0005739: mitochondrion; GO:0005741: mitochondrial outer membrane; GO:0005741: mitochondrial out…
ENSMUSG00000121088	ENSMUSG00000121088	157	225	125	7.1833	10.8208	5.5616	2.33989	3.58617e-10	3.62109e-08	up	4	140861964	140862558	-	lncRNA	novel transcript%2C sense intronic to Szrd1
ENSMUSG00000046402	Rbp1	1153	1369	1485	11.8358	14.7714	14.8238	1.54819	3.61429e-10	3.62579e-08	up	9	98305014	98328628	+	protein_coding	retinol binding protein 1%2C cellular [Source:MGI Symbol%3BAcc:MGI:97876]			GO:0002138: retinoic acid biosynthetic process; GO:0005501: retinoid binding; GO:0005504: fatty acid binding; GO:0005634: nucleus; GO:0005654: nucleoplasm; GO:0005737: cytoplasm; GO:0005811: lipid droplet; GO:0005811: lipid droplet; GO:0005829: cytosol; GO:0005829: cytosol; GO:0006776: vitamin A metabolic process; GO:0008289: lipid binding; GO:0015908: fatty acid transport; GO:0016918: retinal bi…
ENSMUSG00000047420	Fam180a	167	140	125	2.8308	2.4945	2.0605	2.33142	4.19011e-10	4.17632e-08	up	6	35289603	35303076	-	protein_coding	family with sequence similarity 180%2C member A [Source:MGI Symbol%3BAcc:MGI:3039626]			GO:0003674: molecular_function; GO:0005575: cellular_component; GO:0005576: extracellular region; GO:0008150: biological_process
ENSMUSG00000026837	Col5a1	682	589	507	2.1692	1.9692	1.5682	1.54361	4.84178e-10	4.79492e-08	up	2	27776437	27929526	+	protein_coding	collagen%2C type V%2C alpha 1 [Source:MGI Symbol%3BAcc:MGI:88457]	K19721: COL5AS; collagen type V/XI/XXIV/XXVII, alpha	mmu04974: Protein digestion and absorption - Mus musculus (house mouse)	GO:0001568: blood vessel development; GO:0003007: heart morphogenesis; GO:0005201: extracellular matrix structural constituent; GO:0005201: extracellular matrix structural constituent; GO:0005515: protein binding; GO:0005576: extracellular region; GO:0005581: collagen trimer; GO:0005581: collagen trimer; GO:0005588: collagen type V trimer; GO:0005588: collagen type V trimer; GO:0005592: collagen …
ENSMUSG00000006800	Sulf2	605	623	694	2.8053	3.0365	3.1294	1.19104	4.96109e-10	4.88178e-08	up	2	165915009	165997583	-	protein_coding	sulfatase 2 [Source:MGI Symbol%3BAcc:MGI:1919293]	K14607: SULF; extracellular sulfatase Sulf [EC:3.1.6.-]		GO:0001822: kidney development; GO:0002063: chondrocyte development; GO:0003094: glomerular filtration; GO:0003824: catalytic activity; GO:0004065: arylsulfatase activity; GO:0005509: calcium ion binding; GO:0005539: glycosaminoglycan binding; GO:0005615: extracellular space; GO:0005783: endoplasmic reticulum; GO:0005783: endoplasmic reticulum; GO:0005794: Golgi apparatus; GO:0005886: plasma memb…
ENSMUSG00000032902	Slc16a1	2980	2328	2149	18.3293	15.051	12.8538	-1.15587	5.01781e-10	4.90634e-08	down	3	104545984	104565778	+	protein_coding	solute carrier family 16 (monocarboxylic acid transporters)%2C member 1 [Source:MGI Symbol%3BAcc:MGI:106013]	K08179: SLC16A1; MFS transporter, MCT family, solute carrier family 16 (monocarboxylic acid transporters), member 1		GO:0005739: mitochondrion; GO:0005813: centrosome; GO:0005886: plasma membrane; GO:0005886: plasma membrane; GO:0005887: integral component of plasma membrane; GO:0005887: integral component of plasma membrane; GO:0006629: lipid metabolic process; GO:0007098: centrosome cycle; GO:0008028: monocarboxylic acid transmembrane transporter activity; GO:0008028: monocarboxylic acid transmembrane transpo…
ENSMUSG00000116718	Gm49668	534	672	469	4.242	5.6111	3.623	1.42998	5.14275e-10	4.99688e-08	up	17	15642064	15655227	-	lncRNA	predicted gene%2C 49668 [Source:MGI Symbol%3BAcc:MGI:6215110]
ENSMUSG00000027580	Helz2	5573	5185	4845	13.1595	12.8691	11.1252	-0.91104	5.83214e-10	5.6313e-08	false	2	180869408	180883820	-	protein_coding	helicase with zinc finger 2%2C transcriptional coactivator [Source:MGI Symbol%3BAcc:MGI:2385169]	K25165: HELZ2; helicase with zinc finger domain 2 [EC:3.6.4.-]		GO:0000166: nucleotide binding; GO:0000184: nuclear-transcribed mRNA catabolic process, nonsense-mediated decay; GO:0003677: DNA binding; GO:0003723: RNA binding; GO:0003724: RNA helicase activity; GO:0004386: helicase activity; GO:0004540: ribonuclease activity; GO:0005524: ATP binding; GO:0005634: nucleus; GO:0005654: nucleoplasm; GO:0005737: cytoplasm; GO:0016787: hydrolase activity; GO:003037…
ENSMUSG00000008845	Cd163	336	400	244	1.675	2.0959	1.1828	-1.92989	6.28689e-10	6.03268e-08	down	6	124281615	124307486	+	protein_coding	CD163 antigen [Source:MGI Symbol%3BAcc:MGI:2135946]	K06545: CD163; CD163 antigen		GO:0005044: scavenger receptor activity; GO:0005576: extracellular region; GO:0005886: plasma membrane; GO:0006953: acute-phase response; GO:0006954: inflammatory response; GO:0009897: external side of plasma membrane; GO:0009897: external side of plasma membrane; GO:0009986: cell surface; GO:0016020: membrane; GO:0016021: integral component of membrane; GO:0097110: scaffold protein binding
ENSMUSG00000028599	Tnfrsf1b	1701	1293	1279	12.1286	9.6907	8.8683	-1.11683	6.52499e-10	6.19774e-08	down	4	144940033	144973440	-	protein_coding	tumor necrosis factor receptor superfamily%2C member 1b [Source:MGI Symbol%3BAcc:MGI:1314883]	K05141: TNFRSF1B, TNFR2, CD120b; tumor necrosis factor receptor superfamily member 1B	mmu04060: Cytokine-cytokine receptor interaction - Mus musculus (house mouse); mmu04061: Viral protein interaction with cytokine and cytokine receptor - Mus musculus (house mouse); mmu04668: TNF signaling pathway - Mus musculus (house mouse); mmu04920: Adipocytokine signaling pathway - Mus musculus (house mouse); mmu05014: Amyotrophic lateral sclerosis - Mus musculus (house mouse); mmu05022: Path…	GO:0002718: regulation of cytokine production involved in immune response; GO:0002724: regulation of T cell cytokine production; GO:0002724: regulation of T cell cytokine production; GO:0003176: aortic valve development; GO:0003177: pulmonary valve development; GO:0003332: negative regulation of extracellular matrix constituent secretion; GO:0005031: tumor necrosis factor receptor activity; GO:00…
ENSMUSG00000049800	Sertad2	560	460	468	2.4	2.0722	1.9505	-0.99867	6.53914e-10	6.19774e-08	false	11	20493253	20603021	+	protein_coding	SERTA domain containing 2 [Source:MGI Symbol%3BAcc:MGI:1931026]			GO:0003713: transcription coactivator activity; GO:0005515: protein binding; GO:0005634: nucleus; GO:0005634: nucleus; GO:0005654: nucleoplasm; GO:0005737: cytoplasm; GO:0005829: cytosol; GO:0030308: negative regulation of cell growth; GO:0045893: positive regulation of DNA-templated transcription; GO:0140110: transcription regulator activity
ENSMUSG00000017950	Hnf4a	23855	19820	20568	134.509	117.471	112.78	-0.99705	6.86747e-10	6.46924e-08	false	2	163348728	163414830	+	protein_coding	hepatic nuclear factor 4%2C alpha [Source:MGI Symbol%3BAcc:MGI:109128]	K07292: NR2A1, HNF4A; hepatocyte nuclear factor 4-alpha	mmu04152: AMPK signaling pathway - Mus musculus (house mouse); mmu04950: Maturity onset diabetes of the young - Mus musculus (house mouse)	GO:0000062: fatty-acyl-CoA binding; GO:0000785: chromatin; GO:0000976: transcription cis-regulatory region binding; GO:0000976: transcription cis-regulatory region binding; GO:0000978: RNA polymerase II cis-regulatory region sequence-specific DNA binding; GO:0000978: RNA polymerase II cis-regulatory region sequence-specific DNA binding; GO:0000981: DNA-binding transcription factor activity, RNA p…	RXR-like
ENSMUSG00000037798	Mat1a	102124	79522	89783	801.658	656.146	685.365	-1.14742	7.41908e-10	6.94651e-08	down	14	40826992	40846369	+	protein_coding	methionine adenosyltransferase I%2C alpha [Source:MGI Symbol%3BAcc:MGI:88017]	K00789: metK, MAT; S-adenosylmethionine synthetase [EC:2.5.1.6]	mmu00270: Cysteine and methionine metabolism - Mus musculus (house mouse); mmu01100: Metabolic pathways - Mus musculus (house mouse); mmu01230: Biosynthesis of amino acids - Mus musculus (house mouse); mmu01240: Biosynthesis of cofactors - Mus musculus (house mouse)	GO:0000166: nucleotide binding; GO:0000287: magnesium ion binding; GO:0004478: methionine adenosyltransferase activity; GO:0004478: methionine adenosyltransferase activity; GO:0004478: methionine adenosyltransferase activity; GO:0005524: ATP binding; GO:0005829: cytosol; GO:0005829: cytosol; GO:0006556: S-adenosylmethionine biosynthetic process; GO:0006556: S-adenosylmethionine biosynthetic proce…
ENSMUSG00000018900	Slc22a5	1317	505	1089	11.6747	4.7055	9.3876	-2.07862	7.46451e-10	6.94694e-08	down	11	53755368	53782486	-	protein_coding	solute carrier family 22 (organic cation transporter)%2C member 5 [Source:MGI Symbol%3BAcc:MGI:1329012]	K08202: SLC22A4_5, OCTN; MFS transporter, OCT family, solute carrier family 22 (organic cation transporter), member 4/5	mmu05231: Choline metabolism in cancer - Mus musculus (house mouse)	GO:0000166: nucleotide binding; GO:0005524: ATP binding; GO:0005737: cytoplasm; GO:0005829: cytosol; GO:0005886: plasma membrane; GO:0006811: ion transport; GO:0006814: sodium ion transport; GO:0007005: mitochondrion organization; GO:0007512: adult heart development; GO:0007626: locomotory behavior; GO:0009437: carnitine metabolic process; GO:0009609: response to symbiotic bacterium; GO:0015226: …
ENSMUSG00000029591	Ung	121	104	136	0.6024	0.5442	0.6584	-1.53137	8.12039e-10	7.51209e-08	down	5	114268447	114277384	+	protein_coding	uracil DNA glycosylase [Source:MGI Symbol%3BAcc:MGI:109352]	K03648: UNG, UDG; uracil-DNA glycosylase [EC:3.2.2.27]	mmu03410: Base excision repair - Mus musculus (house mouse); mmu05340: Primary immunodeficiency - Mus musculus (house mouse)	GO:0003684: damaged DNA binding; GO:0004844: uracil DNA N-glycosylase activity; GO:0004844: uracil DNA N-glycosylase activity; GO:0004844: uracil DNA N-glycosylase activity; GO:0004844: uracil DNA N-glycosylase activity; GO:0005634: nucleus; GO:0005634: nucleus; GO:0005654: nucleoplasm; GO:0005739: mitochondrion; GO:0005739: mitochondrion; GO:0005739: mitochondrion; GO:0005739: mitochondrion; GO:…
ENSMUSG00000025014	Dntt	140	191	153	1.6629	2.3846	1.7672	2.23957	8.70962e-10	8.00922e-08	up	19	41017714	41047964	+	protein_coding	deoxynucleotidyltransferase%2C terminal [Source:MGI Symbol%3BAcc:MGI:98659]	K00977: DNTT; DNA nucleotidylexotransferase [EC:2.7.7.31]	mmu03450: Non-homologous end-joining - Mus musculus (house mouse); mmu04640: Hematopoietic cell lineage - Mus musculus (house mouse)	GO:0003677: DNA binding; GO:0003887: DNA-directed DNA polymerase activity; GO:0003912: DNA nucleotidylexotransferase activity; GO:0003912: DNA nucleotidylexotransferase activity; GO:0003912: DNA nucleotidylexotransferase activity; GO:0005634: nucleus; GO:0005634: nucleus; GO:0005634: nucleus; GO:0005654: nucleoplasm; GO:0005737: cytoplasm; GO:0005829: cytosol; GO:0006259: DNA metabolic process; G…
ENSMUSG00000031538	Plat	122	88	75	0.5322	0.4035	0.3181	3.4145	1.06729e-09	9.75655e-08	up	8	23247743	23272860	+	protein_coding	plasminogen activator%2C tissue [Source:MGI Symbol%3BAcc:MGI:97610]	K01343: PLAT; tissue plasminogen activator [EC:3.4.21.68]	mmu04371: Apelin signaling pathway - Mus musculus (house mouse); mmu04610: Complement and coagulation cascades - Mus musculus (house mouse); mmu05202: Transcriptional misregulation in cancer - Mus musculus (house mouse); mmu05215: Prostate cancer - Mus musculus (house mouse); mmu05418: Fluid shear stress and atherosclerosis - Mus musculus (house mouse)	GO:0001666: response to hypoxia; GO:0004252: serine-type endopeptidase activity; GO:0004252: serine-type endopeptidase activity; GO:0004252: serine-type endopeptidase activity; GO:0005102: signaling receptor binding; GO:0005576: extracellular region; GO:0005615: extracellular space; GO:0005615: extracellular space; GO:0005615: extracellular space; GO:0005737: cytoplasm; GO:0005737: cytoplasm; GO:…
ENSMUSG00000041548	Hspb8	5301	4143	5116	74.0055	60.7957	69.4549	-1.34341	1.09975e-09	9.99418e-08	down	5	116546550	116560923	-	protein_coding	heat shock protein 8 [Source:MGI Symbol%3BAcc:MGI:2135756]	K08879: HSPB8; heat shock protein beta-8		GO:0005515: protein binding; GO:0005634: nucleus; GO:0005634: nucleus; GO:0005654: nucleoplasm; GO:0005737: cytoplasm; GO:0005737: cytoplasm; GO:0005829: cytosol; GO:0034620: cellular response to unfolded protein; GO:0034620: cellular response to unfolded protein; GO:0042802: identical protein binding; GO:0042803: protein homodimerization activity; GO:0101031: chaperone complex; GO:0101031: chape…
ENSMUSG00000037523	Mavs	2978	3162	3014	24.2365	27.0494	23.8536	-0.85596	1.15808e-09	1.04626e-07	false	2	131075983	131089945	+	protein_coding	mitochondrial antiviral signaling protein [Source:MGI Symbol%3BAcc:MGI:2444773]	K12648: MAVS, IPS1; mitochondrial antiviral-signaling protein	mmu04621: NOD-like receptor signaling pathway - Mus musculus (house mouse); mmu04622: RIG-I-like receptor signaling pathway - Mus musculus (house mouse); mmu04623: Cytosolic DNA-sensing pathway - Mus musculus (house mouse); mmu05160: Hepatitis C - Mus musculus (house mouse); mmu05161: Hepatitis B - Mus musculus (house mouse); mmu05162: Measles - Mus musculus (house mouse); mmu05164: Influenza A -…	GO:0001934: positive regulation of protein phosphorylation; GO:0002218: activation of innate immune response; GO:0002230: positive regulation of defense response to virus by host; GO:0002230: positive regulation of defense response to virus by host; GO:0002376: immune system process; GO:0002735: positive regulation of myeloid dendritic cell cytokine production; GO:0005515: protein binding; GO:000…
ENSMUSG00000100094	1810008I18Rik	4446	6622	4122	30.5027	47.754	27.5007	1.48928	1.23575e-09	1.10994e-07	up	7	65452758	65457460	+	lncRNA	RIKEN cDNA 1810008I18 gene [Source:MGI Symbol%3BAcc:MGI:1920875]			GO:0003674: molecular_function; GO:0005575: cellular_component; GO:0008150: biological_process
ENSMUSG00000021539	Lect2	3261	3426	3268	96.5997	106.675	94.1399	0.96436	1.32221e-09	1.18074e-07	false	13	56690277	56696315	-	protein_coding	leukocyte cell-derived chemotaxin 2 [Source:MGI Symbol%3BAcc:MGI:1278342]	K25755: LECT2; leukocyte cell-derived chemotaxin-2		GO:0005576: extracellular region; GO:0005829: cytosol; GO:0006935: chemotaxis; GO:0030178: negative regulation of Wnt signaling pathway; GO:0042802: identical protein binding; GO:0042802: identical protein binding; GO:0043231: intracellular membrane-bounded organelle; GO:0046872: metal ion binding
ENSMUSG00000111074	Gm36435	73	101	75	1.687	2.4534	1.6855	3.26853	1.33046e-09	1.18128e-07	up	9	42186060	42191174	-	lncRNA	predicted gene%2C 36435 [Source:MGI Symbol%3BAcc:MGI:5595594]
ENSMUSG00000045973	Slc25a51	3532	2633	3271	17.4506	13.6739	15.7158	-0.98986	1.3732e-09	1.21226e-07	false	4	45395923	45408766	-	protein_coding	solute carrier family 25%2C member 51 [Source:MGI Symbol%3BAcc:MGI:2684984]	K26152: SLC25A51_52; solute carrier family 25 (mitochondrial nicotinamide adenine dinucleotide transporter), member 51/52		GO:0005739: mitochondrion; GO:0005739: mitochondrion; GO:0005739: mitochondrion; GO:0005743: mitochondrial inner membrane; GO:0016020: membrane; GO:0016021: integral component of membrane; GO:0035352: NAD transmembrane transport; GO:0051724: NAD transmembrane transporter activity; GO:0051724: NAD transmembrane transporter activity; GO:1990542: mitochondrial transmembrane transport; GO:1990549: mi…
ENSMUSG00000023004	Tuba1b	1543	2077	1738	22.403	31.6977	24.5389	1.1571	1.42531e-09	1.25111e-07	up	15	98829306	98832446	-	protein_coding	tubulin%2C alpha 1B [Source:MGI Symbol%3BAcc:MGI:107804]	K07374: TUBA; tubulin alpha	mmu04145: Phagosome - Mus musculus (house mouse); mmu04210: Apoptosis - Mus musculus (house mouse); mmu04530: Tight junction - Mus musculus (house mouse); mmu04540: Gap junction - Mus musculus (house mouse); mmu05010: Alzheimer disease - Mus musculus (house mouse); mmu05012: Parkinson disease - Mus musculus (house mouse); mmu05014: Amyotrophic lateral sclerosis - Mus musculus (house mouse); mmu05…	GO:0000166: nucleotide binding; GO:0000226: microtubule cytoskeleton organization; GO:0000278: mitotic cell cycle; GO:0003725: double-stranded RNA binding; GO:0003924: GTPase activity; GO:0005200: structural constituent of cytoskeleton; GO:0005515: protein binding; GO:0005525: GTP binding; GO:0005737: cytoplasm; GO:0005829: cytosol; GO:0005856: cytoskeleton; GO:0005874: microtubule; GO:0005874: m…
ENSMUSG00000020917	Acly	12795	25008	10260	65.9826	135.556	51.4521	1.97411	1.73109e-09	1.51094e-07	up	11	100367179	100418826	-	protein_coding	ATP citrate lyase [Source:MGI Symbol%3BAcc:MGI:103251]	K01648: ACLY; ATP citrate (pro-S)-lyase [EC:2.3.3.8]	mmu00020: Citrate cycle (TCA cycle) - Mus musculus (house mouse); mmu01100: Metabolic pathways - Mus musculus (house mouse)	GO:0000166: nucleotide binding; GO:0003824: catalytic activity; GO:0003878: ATP citrate synthase activity; GO:0003878: ATP citrate synthase activity; GO:0003878: ATP citrate synthase activity; GO:0005515: protein binding; GO:0005524: ATP binding; GO:0005654: nucleoplasm; GO:0005737: cytoplasm; GO:0005739: mitochondrion; GO:0005829: cytosol; GO:0005829: cytosol; GO:0006084: acetyl-CoA metabolic pr…
ENSMUSG00000024940	Ltbp3	283	257	230	0.8495	0.8109	0.6714	1.66366	1.86423e-09	1.6007e-07	up	19	5790932	5808560	+	protein_coding	latent transforming growth factor beta binding protein 3 [Source:MGI Symbol%3BAcc:MGI:1101355]	K08023: LTBP2_3_4; latent transforming growth factor beta binding protein 2/3/4		GO:0001501: skeletal system development; GO:0002062: chondrocyte differentiation; GO:0005509: calcium ion binding; GO:0005576: extracellular region; GO:0007179: transforming growth factor beta receptor signaling pathway; GO:0007179: transforming growth factor beta receptor signaling pathway; GO:0019838: growth factor binding; GO:0030282: bone mineralization; GO:0030502: negative regulation of bon…
ENSMUSG00000031604	Msmo1	7062	8045	6082	31.2908	37.4686	26.2061	1.54715	1.86501e-09	1.6007e-07	up	8	65171173	65186826	-	protein_coding	methylsterol monoxygenase 1 [Source:MGI Symbol%3BAcc:MGI:1913484]	K07750: MESO1, ERG25; methylsterol monooxygenase [EC:1.14.18.9]	mmu00100: Steroid biosynthesis - Mus musculus (house mouse); mmu01100: Metabolic pathways - Mus musculus (house mouse)	GO:0000254: C-4 methylsterol oxidase activity; GO:0005506: iron ion binding; GO:0005783: endoplasmic reticulum; GO:0005789: endoplasmic reticulum membrane; GO:0006629: lipid metabolic process; GO:0006694: steroid biosynthetic process; GO:0006695: cholesterol biosynthetic process; GO:0008202: steroid metabolic process; GO:0008203: cholesterol metabolic process; GO:0008610: lipid biosynthetic proce…
ENSMUSG00000035247	Hectd1	5724	4340	4243	10.4232	8.3069	7.5134	-0.99526	1.85222e-09	1.6007e-07	false	12	51790505	51876319	-	protein_coding	HECT domain E3 ubiquitin protein ligase 1 [Source:MGI Symbol%3BAcc:MGI:2384768]	K12231: HECTD1; E3 ubiquitin-protein ligase HECTD1 [EC:2.3.2.26]		GO:0000209: protein polyubiquitination; GO:0001779: natural killer cell differentiation; GO:0001843: neural tube closure; GO:0001892: embryonic placenta development; GO:0003170: heart valve development; GO:0003281: ventricular septum development; GO:0004842: ubiquitin-protein transferase activity; GO:0005515: protein binding; GO:0016567: protein ubiquitination; GO:0016607: nuclear speck; GO:00167…
ENSMUSG00000037148	Arhgap10	261	354	290	2.3039	3.2846	2.4894	1.72246	1.92065e-09	1.63934e-07	up	8	77976995	78244582	-	protein_coding	Rho GTPase activating protein 10 [Source:MGI Symbol%3BAcc:MGI:1925764]	K13736: ARHGAP10; Rho GTPase-activating protein 10	mmu05100: Bacterial invasion of epithelial cells - Mus musculus (house mouse)	GO:0005096: GTPase activator activity; GO:0005096: GTPase activator activity; GO:0005515: protein binding; GO:0005737: cytoplasm; GO:0005829: cytosol; GO:0005829: cytosol; GO:0005829: cytosol; GO:0005886: plasma membrane; GO:0007010: cytoskeleton organization; GO:0007010: cytoskeleton organization; GO:0007165: signal transduction; GO:0016020: membrane; GO:0043066: negative regulation of apoptotic…
ENSMUSG00000015312	Gadd45b	260	274	281	4.4544	4.9342	4.6815	-1.94349	1.96881e-09	1.67121e-07	down	10	80765907	80768038	+	protein_coding	growth arrest and DNA-damage-inducible 45 beta [Source:MGI Symbol%3BAcc:MGI:107776]	K04402: GADD45; growth arrest and DNA-damage-inducible protein	mmu04010: MAPK signaling pathway - Mus musculus (house mouse); mmu04064: NF-kappa B signaling pathway - Mus musculus (house mouse); mmu04068: FoxO signaling pathway - Mus musculus (house mouse); mmu04110: Cell cycle - Mus musculus (house mouse); mmu04115: p53 signaling pathway - Mus musculus (house mouse); mmu04210: Apoptosis - Mus musculus (house mouse); mmu04218: Cellular senescence - Mus muscu…	GO:0005515: protein binding; GO:0005634: nucleus; GO:0005634: nucleus; GO:0005634: nucleus; GO:0005737: cytoplasm; GO:0005737: cytoplasm; GO:0006469: negative regulation of protein kinase activity; GO:0006915: apoptotic process; GO:0007275: multicellular organism development; GO:0030154: cell differentiation; GO:0043065: positive regulation of apoptotic process; GO:0043410: positive regulation of…
ENSMUSG00000037852	Cpe	124	108	58	1.2939	1.1845	0.5885	5.5815	2.01725e-09	1.70298e-07	up	8	65045576	65146088	-	protein_coding	carboxypeptidase E [Source:MGI Symbol%3BAcc:MGI:101932]	K01294: CPE; carboxypeptidase E [EC:3.4.17.10]	mmu04940: Type I diabetes mellitus - Mus musculus (house mouse)	GO:0003214: cardiac left ventricle morphogenesis; GO:0004180: carboxypeptidase activity; GO:0004180: carboxypeptidase activity; GO:0004181: metallocarboxypeptidase activity; GO:0005515: protein binding; GO:0005576: extracellular region; GO:0005615: extracellular space; GO:0005615: extracellular space; GO:0005615: extracellular space; GO:0005794: Golgi apparatus; GO:0006508: proteolysis; GO:000651…
ENSMUSG00000021943	Gdf10	771	715	604	4.0286	3.927	3.0691	1.40173	2.7181e-09	2.28217e-07	up	14	33645544	33659940	+	protein_coding	growth differentiation factor 10 [Source:MGI Symbol%3BAcc:MGI:95684]	K22674: GDF10, BMP3B; growth differentiation factor 10	mmu04060: Cytokine-cytokine receptor interaction - Mus musculus (house mouse)	GO:0001503: ossification; GO:0001649: osteoblast differentiation; GO:0005125: cytokine activity; GO:0005576: extracellular region; GO:0005615: extracellular space; GO:0005615: extracellular space; GO:0008083: growth factor activity; GO:0010862: positive regulation of pathway-restricted SMAD protein phosphorylation; GO:0010862: positive regulation of pathway-restricted SMAD protein phosphorylation…
ENSMUSG00000020486	Septin4	522	519	547	2.6161	2.734	2.6658	1.1645	2.97257e-09	2.48234e-07	up	11	87457479	87481365	+	protein_coding	septin 4 [Source:MGI Symbol%3BAcc:MGI:1270156]	K16943: SEPT4; septin 4	mmu04210: Apoptosis - Mus musculus (house mouse); mmu04215: Apoptosis - multiple species - Mus musculus (house mouse)	GO:0000166: nucleotide binding; GO:0000287: magnesium ion binding; GO:0001764: neuron migration; GO:0003924: GTPase activity; GO:0003924: GTPase activity; GO:0005515: protein binding; GO:0005525: GTP binding; GO:0005654: nucleoplasm; GO:0005737: cytoplasm; GO:0005739: mitochondrion; GO:0005739: mitochondrion; GO:0005929: cilium; GO:0005940: septin ring; GO:0007049: cell cycle; GO:0007283: spermat…
ENSMUSG00000002265	Peg3	213	108	173	0.4259	0.227	0.3364	-1.7883	3.17858e-09	2.6401e-07	down	7	6706891	6733430	-	protein_coding	paternally expressed 3 [Source:MGI Symbol%3BAcc:MGI:104748]	K09230: SCAN; SCAN domain-containing zinc finger protein		GO:0000122: negative regulation of transcription by RNA polymerase II; GO:0000977: RNA polymerase II transcription regulatory region sequence-specific DNA binding; GO:0000981: DNA-binding transcription factor activity, RNA polymerase II-specific; GO:0001227: DNA-binding transcription repressor activity, RNA polymerase II-specific; GO:0005634: nucleus; GO:0005737: cytoplasm; GO:0005776: autophagos…	zf-C2H2
ENSMUSG00000099568	Gm28513	83	78	217	3.686	3.6411	9.3714	3.64888	3.2761e-09	2.70655e-07	up	1	153619298	153625070	-	lncRNA	predicted gene 28513 [Source:MGI Symbol%3BAcc:MGI:5579219]
ENSMUSG00000044748	Defb1	237	232	311	7.399	7.6131	9.4417	2.96725	3.46746e-09	2.8494e-07	up	8	22266615	22285201	+	protein_coding	defensin beta 1 [Source:MGI Symbol%3BAcc:MGI:1096878]	K23125: DEFB1; beta-defensin 1	mmu02010: ABC transporters - Mus musculus (house mouse); mmu05150: Staphylococcus aureus infection - Mus musculus (house mouse)	GO:0002227: innate immune response in mucosa; GO:0002227: innate immune response in mucosa; GO:0005576: extracellular region; GO:0005615: extracellular space; GO:0005615: extracellular space; GO:0006952: defense response; GO:0009617: response to bacterium; GO:0009617: response to bacterium; GO:0016020: membrane; GO:0019731: antibacterial humoral response; GO:0019898: extrinsic component of membra…
ENSMUSG00000042834	Nrep	433	246	287	3.0163	1.8012	1.9442	1.82387	3.74578e-09	3.06183e-07	up	18	33570072	33597082	-	protein_coding	neuronal regeneration related protein [Source:MGI Symbol%3BAcc:MGI:99444]			GO:0005515: protein binding; GO:0005634: nucleus; GO:0005634: nucleus; GO:0005737: cytoplasm; GO:0005737: cytoplasm; GO:0017015: regulation of transforming growth factor beta receptor signaling pathway; GO:0017015: regulation of transforming growth factor beta receptor signaling pathway; GO:0031103: axon regeneration; GO:0045664: regulation of neuron differentiation; GO:0045664: regulation of neu…
ENSMUSG00000039917	Rhbdd2	607	497	571	2.1933	1.8877	2.0064	-1.02425	4.25179e-09	3.45716e-07	down	5	135661472	135675302	+	protein_coding	rhomboid domain containing 2 [Source:MGI Symbol%3BAcc:MGI:1915612]	K09652: RHBDD2, RHBDL7; rhomboid domain-containing protein 2		GO:0000139: Golgi membrane; GO:0004252: serine-type endopeptidase activity; GO:0005654: nucleoplasm; GO:0005794: Golgi apparatus; GO:0005794: Golgi apparatus; GO:0016020: membrane; GO:0016021: integral component of membrane; GO:0048471: perinuclear region of cytoplasm
ENSMUSG00000041801	Phlda3	114	91	104	1.9907	1.6703	1.766	2.26872	5.14603e-09	4.16236e-07	up	1	135693857	135696874	+	protein_coding	pleckstrin homology like domain%2C family A%2C member 3 [Source:MGI Symbol%3BAcc:MGI:1351485]	K23793: PHLDA; pleckstrin homology-like domain family A		GO:0005546: phosphatidylinositol-4,5-bisphosphate binding; GO:0005547: phosphatidylinositol-3,4,5-trisphosphate binding; GO:0005737: cytoplasm; GO:0005886: plasma membrane; GO:0005886: plasma membrane; GO:0006915: apoptotic process; GO:0010314: phosphatidylinositol-5-phosphate binding; GO:0016020: membrane; GO:0032266: phosphatidylinositol-3-phosphate binding; GO:0042771: intrinsic apoptotic sign…
ENSMUSG00000039878	Slc39a5	91	71	124	1.1134	0.9131	1.4754	2.90505	5.48042e-09	4.40974e-07	up	10	128231800	128237098	-	protein_coding	solute carrier family 39 (metal ion transporter)%2C member 5 [Source:MGI Symbol%3BAcc:MGI:1919336]	K14711: SLC39A5, ZIP5; solute carrier family 39 (zinc transporter), member 5	mmu05010: Alzheimer disease - Mus musculus (house mouse); mmu05012: Parkinson disease - Mus musculus (house mouse)	GO:0001654: eye development; GO:0005385: zinc ion transmembrane transporter activity; GO:0005385: zinc ion transmembrane transporter activity; GO:0005886: plasma membrane; GO:0005886: plasma membrane; GO:0005887: integral component of plasma membrane; GO:0006811: ion transport; GO:0006829: zinc ion transport; GO:0006882: cellular zinc ion homeostasis; GO:0006882: cellular zinc ion homeostasis; GO…
ENSMUSG00000039601	Rcan2	68	56	66	0.4234	0.3665	0.3996	-1.54356	6.21603e-09	4.97572e-07	down	17	44112242	44350407	+	protein_coding	regulator of calcineurin 2 [Source:MGI Symbol%3BAcc:MGI:1858219]	K17903: RCAN2, ZAKI4; calcipressin-2	mmu04919: Thyroid hormone signaling pathway - Mus musculus (house mouse)	GO:0003676: nucleic acid binding; GO:0005634: nucleus; GO:0005737: cytoplasm; GO:0006950: response to stress; GO:0006950: response to stress; GO:0006979: response to oxidative stress; GO:0007219: Notch signaling pathway; GO:0007614: short-term memory; GO:0008597: calcium-dependent protein serine/threonine phosphatase regulator activity; GO:0019722: calcium-mediated signaling; GO:0031987: locomoti…
ENSMUSG00000002944	Cd36	2807	2876	1727	21.2857	22.9238	12.7352	2.03342	6.8234e-09	5.43375e-07	up	5	17986688	18093799	-	protein_coding	CD36 molecule [Source:MGI Symbol%3BAcc:MGI:107899]	K06259: CD36; CD36 antigen	mmu03320: PPAR signaling pathway - Mus musculus (house mouse); mmu04145: Phagosome - Mus musculus (house mouse); mmu04152: AMPK signaling pathway - Mus musculus (house mouse); mmu04512: ECM-receptor interaction - Mus musculus (house mouse); mmu04640: Hematopoietic cell lineage - Mus musculus (house mouse); mmu04920: Adipocytokine signaling pathway - Mus musculus (house mouse); mmu04931: Insulin r…	GO:0000122: negative regulation of transcription by RNA polymerase II; GO:0000165: MAPK cascade; GO:0001540: amyloid-beta binding; GO:0001676: long-chain fatty acid metabolic process; GO:0001819: positive regulation of cytokine production; GO:0001954: positive regulation of cell-matrix adhesion; GO:0003085: negative regulation of systemic arterial blood pressure; GO:0005041: low-density lipoprote…
ENSMUSG00000022894	Adamts5	120	133	85	0.3027	0.3527	0.2085	2.34865	7.07985e-09	5.60906e-07	up	16	85653061	85698716	-	protein_coding	a disintegrin-like and metallopeptidase (reprolysin type) with thrombospondin type 1 motif%2C 5 (aggrecanase-2) [Source:MGI Symbol%3BAcc:MGI:1346321]	K08620: ADAMTS5; a disintegrin and metalloproteinase with thrombospondin motifs 5 [EC:3.4.24.-]		GO:0004175: endopeptidase activity; GO:0004222: metalloendopeptidase activity; GO:0005576: extracellular region; GO:0005615: extracellular space; GO:0005615: extracellular space; GO:0006508: proteolysis; GO:0007520: myoblast fusion; GO:0008201: heparin binding; GO:0008233: peptidase activity; GO:0008237: metallopeptidase activity; GO:0008270: zinc ion binding; GO:0016787: hydrolase activity; GO:0…
ENSMUSG00000078853	Igtp	1742	1105	1414	23.4535	15.6377	18.5129	-1.95285	7.48183e-09	5.89729e-07	down	11	58090382	58098417	+	protein_coding	interferon gamma induced GTPase [Source:MGI Symbol%3BAcc:MGI:107729]	K14140: IGTP; interferon gamma induced GTPase	mmu05145: Toxoplasmosis - Mus musculus (house mouse)	GO:0000045: autophagosome assembly; GO:0000139: Golgi membrane; GO:0001934: positive regulation of protein phosphorylation; GO:0003924: GTPase activity; GO:0003924: GTPase activity; GO:0005739: mitochondrion; GO:0005789: endoplasmic reticulum membrane; GO:0005794: Golgi apparatus; GO:0005829: cytosol; GO:0005829: cytosol; GO:0006952: defense response; GO:0010508: positive regulation of autophagy;…
ENSMUSG00000014542	Clec4f	4127	3639	3801	45.4676	42.1407	40.7223	-0.98328	7.66712e-09	6.01266e-07	false	6	83621524	83633169	-	protein_coding	C-type lectin domain family 4%2C member f [Source:MGI Symbol%3BAcc:MGI:1859834]	K10060: CLEC4F, CLECSF13; C-type lectin domain family 4 member F		GO:0005534: galactose binding; GO:0005886: plasma membrane; GO:0006897: endocytosis; GO:0009897: external side of plasma membrane; GO:0016020: membrane; GO:0016021: integral component of membrane; GO:0030246: carbohydrate binding; GO:0044419: biological process involved in interspecies interaction between organisms; GO:0051132: NK T cell activation; GO:0051861: glycolipid binding
ENSMUSG00000042010	Acacb	4826	7724	4244	13.6399	22.9466	11.6645	1.61591	8.30243e-09	6.47799e-07	up	5	114284596	114388822	+	protein_coding	acetyl-Coenzyme A carboxylase beta [Source:MGI Symbol%3BAcc:MGI:2140940]	K01946: ACACB; acetyl-CoA carboxylase / biotin carboxylase 2 [EC:6.4.1.2 6.3.4.14 2.1.3.15]	mmu00061: Fatty acid biosynthesis - Mus musculus (house mouse); mmu00620: Pyruvate metabolism - Mus musculus (house mouse); mmu00640: Propanoate metabolism - Mus musculus (house mouse); mmu01100: Metabolic pathways - Mus musculus (house mouse); mmu04152: AMPK signaling pathway - Mus musculus (house mouse); mmu04910: Insulin signaling pathway - Mus musculus (house mouse); mmu04920: Adipocytokine s…	GO:0000166: nucleotide binding; GO:0003824: catalytic activity; GO:0003989: acetyl-CoA carboxylase activity; GO:0003989: acetyl-CoA carboxylase activity; GO:0003989: acetyl-CoA carboxylase activity; GO:0003989: acetyl-CoA carboxylase activity; GO:0005524: ATP binding; GO:0005634: nucleus; GO:0005739: mitochondrion; GO:0005739: mitochondrion; GO:0005739: mitochondrion; GO:0005739: mitochondrion; G…
ENSMUSG00000024620	Pdgfrb	865	693	662	4.2987	3.62	3.1992	1.44503	8.74359e-09	6.78793e-07	up	18	61178222	61218133	+	protein_coding	platelet derived growth factor receptor%2C beta polypeptide [Source:MGI Symbol%3BAcc:MGI:97531]	K05089: PDGFRB, CD140B; platelet-derived growth factor receptor beta [EC:2.7.10.1]	mmu01521: EGFR tyrosine kinase inhibitor resistance - Mus musculus (house mouse); mmu04010: MAPK signaling pathway - Mus musculus (house mouse); mmu04014: Ras signaling pathway - Mus musculus (house mouse); mmu04015: Rap1 signaling pathway - Mus musculus (house mouse); mmu04020: Calcium signaling pathway - Mus musculus (house mouse); mmu04072: Phospholipase D signaling pathway - Mus musculus (hou…	GO:0000166: nucleotide binding; GO:0001525: angiogenesis; GO:0001568: blood vessel development; GO:0001701: in utero embryonic development; GO:0001726: ruffle; GO:0001822: kidney development; GO:0001894: tissue homeostasis; GO:0004672: protein kinase activity; GO:0004713: protein tyrosine kinase activity; GO:0004714: transmembrane receptor protein tyrosine kinase activity; GO:0005017: platelet-de…
ENSMUSG00000070436	Serpinh1	1026	984	725	11.4331	11.5256	7.8564	1.58297	9.57862e-09	7.39901e-07	up	7	98994583	99002446	-	protein_coding	serine (or cysteine) peptidase inhibitor%2C clade H%2C member 1 [Source:MGI Symbol%3BAcc:MGI:88283]	K09501: SERPINH1, HSP47; serpin peptidase inhibitor, clade H, member 1		GO:0003433: chondrocyte development involved in endochondral bone morphogenesis; GO:0004867: serine-type endopeptidase inhibitor activity; GO:0005515: protein binding; GO:0005518: collagen binding; GO:0005615: extracellular space; GO:0005737: cytoplasm; GO:0005783: endoplasmic reticulum; GO:0005783: endoplasmic reticulum; GO:0005783: endoplasmic reticulum; GO:0005793: endoplasmic reticulum-Golgi …
ENSMUSG00000033105	Lss	3093	4218	2359	7.8058	11.1892	5.7894	1.68996	1.10573e-08	8.49871e-07	up	10	76367422	76392972	+	protein_coding	lanosterol synthase [Source:MGI Symbol%3BAcc:MGI:1336155]	K01852: LSS, ERG7; lanosterol synthase [EC:5.4.99.7]	mmu00100: Steroid biosynthesis - Mus musculus (house mouse); mmu01100: Metabolic pathways - Mus musculus (house mouse)	GO:0000250: lanosterol synthase activity; GO:0000250: lanosterol synthase activity; GO:0005783: endoplasmic reticulum; GO:0005789: endoplasmic reticulum membrane; GO:0005811: lipid droplet; GO:0005811: lipid droplet; GO:0006629: lipid metabolic process; GO:0006694: steroid biosynthetic process; GO:0006695: cholesterol biosynthetic process; GO:0006695: cholesterol biosynthetic process; GO:0016020:…
ENSMUSG00000042350	Arel1	1611	1394	1261	7.2562	6.5998	5.5233	-0.98683	1.1115e-08	8.50078e-07	false	12	84964922	85017674	-	protein_coding	apoptosis resistant E3 ubiquitin protein ligase 1 [Source:MGI Symbol%3BAcc:MGI:1915747]	K22370: AREL1; apoptosis-resistant E3 ubiquitin protein ligase 1 [EC:2.3.2.26]		GO:0000209: protein polyubiquitination; GO:0004842: ubiquitin-protein transferase activity; GO:0005515: protein binding; GO:0005737: cytoplasm; GO:0005829: cytosol; GO:0006511: ubiquitin-dependent protein catabolic process; GO:0006511: ubiquitin-dependent protein catabolic process; GO:0006915: apoptotic process; GO:0016567: protein ubiquitination; GO:0016567: protein ubiquitination; GO:0016567: p…
ENSMUSG00000015090	Ptgds	152	195	311	2.5094	3.3838	4.9928	3.18024	1.1254e-08	8.52272e-07	up	2	25356721	25360058	-	protein_coding	prostaglandin D2 synthase (brain) [Source:MGI Symbol%3BAcc:MGI:99261]	K01830: PTGDS; prostaglandin-H2 D-isomerase [EC:5.3.99.2]	mmu00590: Arachidonic acid metabolism - Mus musculus (house mouse); mmu01100: Metabolic pathways - Mus musculus (house mouse)	GO:0001516: prostaglandin biosynthetic process; GO:0001516: prostaglandin biosynthetic process; GO:0004667: prostaglandin-D synthase activity; GO:0004667: prostaglandin-D synthase activity; GO:0005501: retinoid binding; GO:0005501: retinoid binding; GO:0005504: fatty acid binding; GO:0005576: extracellular region; GO:0005576: extracellular region; GO:0005615: extracellular space; GO:0005615: extr…
ENSMUSG00000016494	Cd34	169	202	135	0.6311	0.7929	0.4902	2.27045	1.12239e-08	8.52272e-07	up	1	194621127	194643587	+	protein_coding	CD34 antigen [Source:MGI Symbol%3BAcc:MGI:88329]	K06474: CD34; CD34 antigen	mmu04514: Cell adhesion molecules - Mus musculus (house mouse); mmu04640: Hematopoietic cell lineage - Mus musculus (house mouse)	GO:0001894: tissue homeostasis; GO:0001935: endothelial cell proliferation; GO:0005576: extracellular region; GO:0005737: cytoplasm; GO:0005737: cytoplasm; GO:0005764: lysosome; GO:0005886: plasma membrane; GO:0007155: cell adhesion; GO:0007160: cell-matrix adhesion; GO:0008217: regulation of blood pressure; GO:0009897: external side of plasma membrane; GO:0009897: external side of plasma membran…
ENSMUSG00000064145	Arih2	1414	1254	1255	5.0174	4.6772	4.3305	-0.85437	1.14151e-08	8.6025e-07	false	9	108480141	108526585	-	protein_coding	ariadne RBR E3 ubiquitin protein ligase 2 [Source:MGI Symbol%3BAcc:MGI:1344361]	K11969: ARIH2; ariadne-2 [EC:2.3.2.31]		GO:0000151: ubiquitin ligase complex; GO:0000209: protein polyubiquitination; GO:0000209: protein polyubiquitination; GO:0004842: ubiquitin-protein transferase activity; GO:0005515: protein binding; GO:0005634: nucleus; GO:0005654: nucleoplasm; GO:0005737: cytoplasm; GO:0005737: cytoplasm; GO:0006511: ubiquitin-dependent protein catabolic process; GO:0006511: ubiquitin-dependent protein catabolic…
ENSMUSG00000062410	Hsd3b3	7058	8283	7125	30.041	37.0571	29.4906	1.55262	1.19212e-08	8.94031e-07	up	3	98648839	98670443	-	protein_coding	hydroxy-delta-5-steroid dehydrogenase%2C 3 beta- and steroid delta-isomerase 3 [Source:MGI Symbol%3BAcc:MGI:96235]	K00070: HSD3B; 3beta-hydroxy-Delta5-steroid dehydrogenase / steroid Delta-isomerase [EC:1.1.1.145 5.3.3.1]	mmu00140: Steroid hormone biosynthesis - Mus musculus (house mouse); mmu01100: Metabolic pathways - Mus musculus (house mouse); mmu04913: Ovarian steroidogenesis - Mus musculus (house mouse); mmu04925: Aldosterone synthesis and secretion - Mus musculus (house mouse); mmu04927: Cortisol synthesis and secretion - Mus musculus (house mouse); mmu04934: Cushing syndrome - Mus musculus (house mouse)	GO:0003824: catalytic activity; GO:0003854: 3-beta-hydroxy-delta5-steroid dehydrogenase activity; GO:0004769: steroid delta-isomerase activity; GO:0005730: nucleolus; GO:0005737: cytoplasm; GO:0005739: mitochondrion; GO:0005743: mitochondrial inner membrane; GO:0005743: mitochondrial inner membrane; GO:0005758: mitochondrial intermembrane space; GO:0005783: endoplasmic reticulum; GO:0006694: ster…
ENSMUSG00000060961	Slc4a4	3047	2373	2175	7.3193	5.9916	5.0807	-1.03442	1.27964e-08	9.55028e-07	down	5	89034345	89387512	+	protein_coding	solute carrier family 4 (anion exchanger)%2C member 4 [Source:MGI Symbol%3BAcc:MGI:1927555]	K13575: SLC4A4, NBC1; solute carrier family 4 (sodium bicarbonate cotransporter), member 4	mmu04964: Proximal tubule bicarbonate reclamation - Mus musculus (house mouse); mmu04972: Pancreatic secretion - Mus musculus (house mouse); mmu04976: Bile secretion - Mus musculus (house mouse)	GO:0005452: solute:inorganic anion antiporter activity; GO:0005515: protein binding; GO:0005886: plasma membrane; GO:0005886: plasma membrane; GO:0005887: integral component of plasma membrane; GO:0006811: ion transport; GO:0006814: sodium ion transport; GO:0006814: sodium ion transport; GO:0006820: anion transport; GO:0006885: regulation of pH; GO:0008509: anion transmembrane transporter activit…
ENSMUSG00000032392	Parp16	2257	2029	2280	15.8114	14.9407	15.5324	1.07522	1.29823e-08	9.64251e-07	up	9	65102635	65146506	+	protein_coding	poly (ADP-ribose) polymerase family%2C member 16 [Source:MGI Symbol%3BAcc:MGI:2446133]	K00774: PARP16; poly [ADP-ribose] polymerase 16 [EC:2.4.2.30]		GO:0003950: NAD+ ADP-ribosyltransferase activity; GO:0003950: NAD+ ADP-ribosyltransferase activity; GO:0005622: intracellular anatomical structure; GO:0005635: nuclear envelope; GO:0005635: nuclear envelope; GO:0005783: endoplasmic reticulum; GO:0006471: protein ADP-ribosylation; GO:0006471: protein ADP-ribosylation; GO:0006986: response to unfolded protein; GO:0016020: membrane; GO:0016021: inte…
ENSMUSG00000025656	Arhgef9	129	174	155	0.4002	0.5673	0.4676	2.00447	1.51141e-08	1.11722e-06	up	X	94092541	94240462	-	protein_coding	CDC42 guanine nucleotide exchange factor (GEF) 9 [Source:MGI Symbol%3BAcc:MGI:2442233]	K20686: ARHGEF9; Rho guanine nucleotide exchange factor 9		GO:0005085: guanyl-nucleotide exchange factor activity; GO:0005085: guanyl-nucleotide exchange factor activity; GO:0005737: cytoplasm; GO:0005829: cytosol; GO:0005829: cytosol; GO:0005938: cell cortex; GO:0005938: cell cortex; GO:0007264: small GTPase mediated signal transduction; GO:0014069: postsynaptic density; GO:0030054: cell junction; GO:0043113: receptor clustering; GO:0045202: synapse; GO…
ENSMUSG00000022122	Ednrb	552	753	400	3.5226	5.0509	2.4823	1.62565	1.52545e-08	1.12222e-06	up	14	104052061	104081838	-	protein_coding	endothelin receptor type B [Source:MGI Symbol%3BAcc:MGI:102720]	K04198: EDNRB; endothelin receptor type B	mmu04020: Calcium signaling pathway - Mus musculus (house mouse); mmu04022: cGMP-PKG signaling pathway - Mus musculus (house mouse); mmu04080: Neuroactive ligand-receptor interaction - Mus musculus (house mouse); mmu04916: Melanogenesis - Mus musculus (house mouse); mmu04926: Relaxin signaling pathway - Mus musculus (house mouse); mmu05200: Pathways in cancer - Mus musculus (house mouse)	GO:0000122: negative regulation of transcription by RNA polymerase II; GO:0000122: negative regulation of transcription by RNA polymerase II; GO:0001755: neural crest cell migration; GO:0001934: positive regulation of protein phosphorylation; GO:0002001: renin secretion into blood stream; GO:0002027: regulation of heart rate; GO:0002027: regulation of heart rate; GO:0004930: G protein-coupled rec…
ENSMUSG00000022816	Fstl1	380	333	226	2.1052	1.9391	1.2175	1.90378	1.65354e-08	1.20498e-06	up	16	37597235	37656876	+	protein_coding	follistatin-like 1 [Source:MGI Symbol%3BAcc:MGI:102793]	K23912: FSTL1; follistatin-related protein 1		GO:0005509: calcium ion binding; GO:0005515: protein binding; GO:0005576: extracellular region; GO:0005615: extracellular space; GO:0007275: multicellular organism development; GO:0008201: heparin binding; GO:0030154: cell differentiation; GO:0030510: regulation of BMP signaling pathway; GO:0043066: negative regulation of apoptotic process; GO:0043542: endothelial cell migration; GO:0043542: endo…
ENSMUSG00000027660	Skil	413	363	283	1.1598	1.0715	0.7728	-1.48022	1.65262e-08	1.20498e-06	down	3	31149207	31176726	+	protein_coding	SKI-like [Source:MGI Symbol%3BAcc:MGI:106203]	K18499: SKIL; Ski-like protein	mmu04550: Signaling pathways regulating pluripotency of stem cells - Mus musculus (house mouse)	GO:0000122: negative regulation of transcription by RNA polymerase II; GO:0000122: negative regulation of transcription by RNA polymerase II; GO:0000122: negative regulation of transcription by RNA polymerase II; GO:0000122: negative regulation of transcription by RNA polymerase II; GO:0000978: RNA polymerase II cis-regulatory region sequence-specific DNA binding; GO:0000978: RNA polymerase II ci…
ENSMUSG00000005125	Ndrg1	2079	1633	1639	8.5805	7.0843	6.5782	1.05371	1.66266e-08	1.20594e-06	up	15	66801167	66841489	-	protein_coding	N-myc downstream regulated gene 1 [Source:MGI Symbol%3BAcc:MGI:1341799]	K18266: NDRG1; protein NDRG1		GO:0005634: nucleus; GO:0005737: cytoplasm; GO:0005737: cytoplasm; GO:0005737: cytoplasm; GO:0005813: centrosome; GO:0005829: cytosol; GO:0005856: cytoskeleton; GO:0005874: microtubule; GO:0005886: plasma membrane; GO:0005912: adherens junction; GO:0007165: signal transduction; GO:0008017: microtubule binding; GO:0008285: negative regulation of cell population proliferation; GO:0015630: microtubu…
ENSMUSG00000021395	Spin1	1884	1761	1429	11.4026	11.203	8.4105	-1.05554	1.83331e-08	1.32349e-06	down	13	51254916	51306582	+	protein_coding	spindlin 1 [Source:MGI Symbol%3BAcc:MGI:109242]			GO:0003677: DNA binding; GO:0005634: nucleus; GO:0005654: nucleoplasm; GO:0005654: nucleoplasm; GO:0005730: nucleolus; GO:0005737: cytoplasm; GO:0005819: spindle; GO:0005829: cytosol; GO:0005829: cytosol; GO:0005856: cytoskeleton; GO:0006325: chromatin organization; GO:0006355: regulation of DNA-templated transcription; GO:0007049: cell cycle; GO:0007143: female meiotic nuclear division; GO:00072…
ENSMUSG00000039252	Lgi2	81	73	46	0.3378	0.32	0.1865	4.30123	2.03048e-08	1.45902e-06	up	5	52690859	52723804	-	protein_coding	leucine-rich repeat LGI family%2C member 2 [Source:MGI Symbol%3BAcc:MGI:2180196]	K25429: LGI2; leucine-rich repeat LGI family member 2		GO:0005515: protein binding; GO:0005576: extracellular region; GO:0005615: extracellular space; GO:1904862: inhibitory synapse assembly; GO:1904862: inhibitory synapse assembly
ENSMUSG00000069874	Irgm2	2636	2505	1892	19.4473	19.4256	13.5738	-1.48552	2.25258e-08	1.61112e-06	down	11	58090444	58113608	+	protein_coding	immunity-related GTPase family M member 2 [Source:MGI Symbol%3BAcc:MGI:1926262]	K14139: IRGM, LRG47; immunity-related GTPase family M protein [EC:3.6.5.-]	mmu04621: NOD-like receptor signaling pathway - Mus musculus (house mouse); mmu05145: Toxoplasmosis - Mus musculus (house mouse)	GO:0003924: GTPase activity; GO:0003924: GTPase activity; GO:0005737: cytoplasm; GO:0005789: endoplasmic reticulum membrane; GO:0005794: Golgi apparatus; GO:0006952: defense response; GO:0009617: response to bacterium; GO:0034341: response to interferon-gamma; GO:0034341: response to interferon-gamma; GO:0035458: cellular response to interferon-beta; GO:0042742: defense response to bacterium; GO:…
ENSMUSG00000035042	Ccl5	412	107	412	11.6833	3.1894	11.3614	2.918	2.54564e-08	1.81233e-06	up	11	83416604	83421344	-	protein_coding	chemokine (C-C motif) ligand 5 [Source:MGI Symbol%3BAcc:MGI:98262]	K12499: CCL5; C-C motif chemokine 5	mmu04060: Cytokine-cytokine receptor interaction - Mus musculus (house mouse); mmu04061: Viral protein interaction with cytokine and cytokine receptor - Mus musculus (house mouse); mmu04062: Chemokine signaling pathway - Mus musculus (house mouse); mmu04620: Toll-like receptor signaling pathway - Mus musculus (house mouse); mmu04621: NOD-like receptor signaling pathway - Mus musculus (house mouse…	GO:0000165: MAPK cascade; GO:0002230: positive regulation of defense response to virus by host; GO:0002548: monocyte chemotaxis; GO:0004435: phosphatidylinositol phospholipase C activity; GO:0004672: protein kinase activity; GO:0005125: cytokine activity; GO:0005576: extracellular region; GO:0005615: extracellular space; GO:0005615: extracellular space; GO:0005615: extracellular space; GO:0005737…
ENSMUSG00000022181	C6	6602	8565	6007	50.5422	68.9221	44.7201	-1.15419	2.96143e-08	2.09867e-06	down	15	4756657	4844449	+	protein_coding	complement component 6 [Source:MGI Symbol%3BAcc:MGI:88233]	K03995: C6; complement component 6	mmu04610: Complement and coagulation cascades - Mus musculus (house mouse); mmu04810: Regulation of actin cytoskeleton - Mus musculus (house mouse); mmu05020: Prion disease - Mus musculus (house mouse); mmu05171: Coronavirus disease - COVID-19 - Mus musculus (house mouse); mmu05322: Systemic lupus erythematosus - Mus musculus (house mouse)	GO:0001701: in utero embryonic development; GO:0001970: positive regulation of activation of membrane attack complex; GO:0005579: membrane attack complex; GO:0005579: membrane attack complex; GO:0005615: extracellular space; GO:0005615: extracellular space; GO:0005886: plasma membrane; GO:0006956: complement activation; GO:0006956: complement activation; GO:0043065: positive regulation of apoptot…
ENSMUSG00000039063	Echdc3	3082	2822	3157	31.2485	30.075	31.127	0.78221	3.13887e-08	2.21426e-06	false	2	6193276	6217844	-	protein_coding	enoyl Coenzyme A hydratase domain containing 3 [Source:MGI Symbol%3BAcc:MGI:1915106]			GO:0003824: catalytic activity; GO:0004300: enoyl-CoA hydratase activity; GO:0005739: mitochondrion; GO:0005739: mitochondrion; GO:0005739: mitochondrion; GO:0006629: lipid metabolic process; GO:0006631: fatty acid metabolic process; GO:0016836: hydro-lyase activity; GO:1900078: positive regulation of cellular response to insulin stimulus
ENSMUSG00000034708	Grn	8592	7935	9888	67.3295	65.3596	75.3504	-1.25006	3.62082e-08	2.54264e-06	down	11	102321141	102327874	+	protein_coding	granulin [Source:MGI Symbol%3BAcc:MGI:95832]	K23879: GRN; progranulin		GO:0001834: trophectodermal cell proliferation; GO:0001835: blastocyst hatching; GO:0002265: astrocyte activation involved in immune response; GO:0002282: microglial cell activation involved in immune response; GO:0005125: cytokine activity; GO:0005515: protein binding; GO:0005576: extracellular region; GO:0005576: extracellular region; GO:0005576: extracellular region; GO:0005615: extracellular …
ENSMUSG00000032482	Cspg5	26	27	45	0.0703	0.0767	0.1183	-2.04049	3.8451e-08	2.68792e-06	down	9	110072851	110091644	+	protein_coding	chondroitin sulfate proteoglycan 5 [Source:MGI Symbol%3BAcc:MGI:1352747]	K08116: CSPG5; chondroitin sulfate proteoglycan 5		GO:0005783: endoplasmic reticulum; GO:0005794: Golgi apparatus; GO:0005886: plasma membrane; GO:0007010: cytoskeleton organization; GO:0007275: multicellular organism development; GO:0007399: nervous system development; GO:0016020: membrane; GO:0016021: integral component of membrane; GO:0030054: cell junction; GO:0030154: cell differentiation; GO:0030660: Golgi-associated vesicle membrane; GO:00…
ENSMUSG00000063406	Tmed5	546	356	295	1.9334	1.325	1.0158	-1.50942	3.89855e-08	2.71301e-06	down	5	108254232	108280486	-	protein_coding	transmembrane p24 trafficking protein 5 [Source:MGI Symbol%3BAcc:MGI:1921586]	K14825: TMED5, ERP2, ERP4; p24 family protein gamma-2		GO:0003674: molecular_function; GO:0005783: endoplasmic reticulum; GO:0005793: endoplasmic reticulum-Golgi intermediate compartment; GO:0005793: endoplasmic reticulum-Golgi intermediate compartment; GO:0005794: Golgi apparatus; GO:0005801: cis-Golgi network; GO:0006886: intracellular protein transport; GO:0006888: endoplasmic reticulum to Golgi vesicle-mediated transport; GO:0007030: Golgi organi…
ENSMUSG00000020706	Ftsj3	1390	1234	1389	8.683	8.1025	8.4377	-0.80903	3.94949e-08	2.73613e-06	false	11	106139968	106146905	-	protein_coding	FtsJ RNA methyltransferase homolog 3 (E. coli) [Source:MGI Symbol%3BAcc:MGI:1860295]	K14857: SPB1, FTSJ3; AdoMet-dependent rRNA methyltransferase SPB1 [EC:2.1.1.-]		GO:0000463: maturation of LSU-rRNA from tricistronic rRNA transcript (SSU-rRNA, 5.8S rRNA, LSU-rRNA); GO:0000466: maturation of 5.8S rRNA from tricistronic rRNA transcript (SSU-rRNA, 5.8S rRNA, LSU-rRNA); GO:0001510: RNA methylation; GO:0001510: RNA methylation; GO:0005634: nucleus; GO:0005654: nucleoplasm; GO:0005694: chromosome; GO:0005730: nucleolus; GO:0005730: nucleolus; GO:0006364: rRNA pro…
ENSMUSG00000021993	Mipep	1902	1636	1669	9.6082	8.687	8.1989	0.88336	4.06591e-08	2.80421e-06	false	14	61022022	61142927	+	protein_coding	mitochondrial intermediate peptidase [Source:MGI Symbol%3BAcc:MGI:1917728]	K01410: MIPEP; mitochondrial intermediate peptidase [EC:3.4.24.59]		GO:0004175: endopeptidase activity; GO:0004222: metalloendopeptidase activity; GO:0005739: mitochondrion; GO:0005739: mitochondrion; GO:0005739: mitochondrion; GO:0005759: mitochondrial matrix; GO:0006508: proteolysis; GO:0006518: peptide metabolic process; GO:0006627: protein processing involved in protein targeting to mitochondrion; GO:0008233: peptidase activity; GO:0008237: metallopeptidase a…
ENSMUSG00000019899	Lama2	260	184	147	0.4263	0.3171	0.2344	2.11906	4.11e-08	2.82202e-06	up	10	26856032	27495754	-	protein_coding	laminin%2C alpha 2 [Source:MGI Symbol%3BAcc:MGI:99912]	K05637: LAMA1_2; laminin, alpha 1/2	mmu04151: PI3K-Akt signaling pathway - Mus musculus (house mouse); mmu04510: Focal adhesion - Mus musculus (house mouse); mmu04512: ECM-receptor interaction - Mus musculus (house mouse); mmu05145: Toxoplasmosis - Mus musculus (house mouse); mmu05146: Amoebiasis - Mus musculus (house mouse); mmu05165: Human papillomavirus infection - Mus musculus (house mouse); mmu05200: Pathways in cancer - Mus m…	GO:0005102: signaling receptor binding; GO:0005201: extracellular matrix structural constituent; GO:0005201: extracellular matrix structural constituent; GO:0005576: extracellular region; GO:0005576: extracellular region; GO:0005604: basement membrane; GO:0005604: basement membrane; GO:0005604: basement membrane; GO:0005604: basement membrane; GO:0007155: cell adhesion; GO:0007411: axon guidance;…
ENSMUSG00000020176	Grb10	258	230	226	0.7728	0.7241	0.6583	1.29534	4.24082e-08	2.89896e-06	up	11	11880508	11988683	-	protein_coding	growth factor receptor bound protein 10 [Source:MGI Symbol%3BAcc:MGI:103232]	K20064: GRB10; growth factor receptor-bound protein 10	mmu04150: mTOR signaling pathway - Mus musculus (house mouse)	GO:0001784: phosphotyrosine residue binding; GO:0005158: insulin receptor binding; GO:0005158: insulin receptor binding; GO:0005158: insulin receptor binding; GO:0005515: protein binding; GO:0005737: cytoplasm; GO:0005829: cytosol; GO:0007165: signal transduction; GO:0008286: insulin receptor signaling pathway; GO:0008286: insulin receptor signaling pathway; GO:0010467: gene expression; GO:003015…
ENSMUSG00000026773	Pfkfb3	397	349	326	1.4294	1.3208	1.1414	-1.99765	4.76978e-08	3.24618e-06	down	2	11476244	11558888	-	protein_coding	6-phosphofructo-2-kinase/fructose-2%2C6-biphosphatase 3 [Source:MGI Symbol%3BAcc:MGI:2181202]	K01103: PFKFB3; 6-phosphofructo-2-kinase / fructose-2,6-biphosphatase 3 [EC:2.7.1.105 3.1.3.46]	mmu00051: Fructose and mannose metabolism - Mus musculus (house mouse); mmu01100: Metabolic pathways - Mus musculus (house mouse); mmu04066: HIF-1 signaling pathway - Mus musculus (house mouse); mmu04152: AMPK signaling pathway - Mus musculus (house mouse)	GO:0003873: 6-phosphofructo-2-kinase activity; GO:0003873: 6-phosphofructo-2-kinase activity; GO:0004331: fructose-2,6-bisphosphate 2-phosphatase activity; GO:0005654: nucleoplasm; GO:0005829: cytosol; GO:0006003: fructose 2,6-bisphosphate metabolic process; GO:0006003: fructose 2,6-bisphosphate metabolic process
ENSMUSG00000028369	Svep1	170	121	84	0.2871	0.2148	0.138	2.47107	4.89023e-08	3.31356e-06	up	4	58042442	58206859	-	protein_coding	sushi%2C von Willebrand factor type A%2C EGF and pentraxin domain containing 1 [Source:MGI Symbol%3BAcc:MGI:1928849]	K24469: SVEP1; sushi, von Willebrand factor type A, EGF and pentraxin domain-containing protein 1		GO:0001945: lymph vessel development; GO:0003017: lymph circulation; GO:0003682: chromatin binding; GO:0005509: calcium ion binding; GO:0005515: protein binding; GO:0005576: extracellular region; GO:0005615: extracellular space; GO:0005615: extracellular space; GO:0005615: extracellular space; GO:0005634: nucleus; GO:0005737: cytoplasm; GO:0007155: cell adhesion; GO:0008544: epidermis development…
ENSMUSG00000025405	Inhbc	2099	2165	2190	30.7379	33.3251	31.1869	-0.8002	5.48812e-08	3.68829e-06	false	10	127192191	127206300	-	protein_coding	inhibin beta-C [Source:MGI Symbol%3BAcc:MGI:105932]	K22688: INHBC; inhibin beta C chain	mmu04060: Cytokine-cytokine receptor interaction - Mus musculus (house mouse); mmu04350: TGF-beta signaling pathway - Mus musculus (house mouse); mmu04550: Signaling pathways regulating pluripotency of stem cells - Mus musculus (house mouse)	GO:0005125: cytokine activity; GO:0005179: hormone activity; GO:0005576: extracellular region; GO:0005615: extracellular space; GO:0008083: growth factor activity; GO:0010862: positive regulation of pathway-restricted SMAD protein phosphorylation; GO:0060395: SMAD protein signal transduction
ENSMUSG00000025429	Pstpip2	725	1208	597	8.4346	14.7721	6.7541	1.67727	5.49102e-08	3.68829e-06	up	18	77877614	77970579	+	protein_coding	proline-serine-threonine phosphatase-interacting protein 2 [Source:MGI Symbol%3BAcc:MGI:1335088]	K20124: PSTPIP2; proline-serine-threonine phosphatase interacting protein 2		GO:0003779: actin binding; GO:0005515: protein binding; GO:0005737: cytoplasm; GO:0005829: cytosol; GO:0005856: cytoskeleton; GO:0005884: actin filament; GO:0005886: plasma membrane; GO:0007010: cytoskeleton organization; GO:0016020: membrane; GO:0016477: cell migration; GO:0030041: actin filament polymerization; GO:0051015: actin filament binding
ENSMUSG00000001986	Gria3	134	115	148	0.37	0.3338	0.3974	2.3347	5.5394e-08	3.70468e-06	up	X	40489731	40767478	+	protein_coding	glutamate receptor%2C ionotropic%2C AMPA3 (alpha 3) [Source:MGI Symbol%3BAcc:MGI:95810]	K05199: GRIA3; glutamate receptor 3	mmu04024: cAMP signaling pathway - Mus musculus (house mouse); mmu04080: Neuroactive ligand-receptor interaction - Mus musculus (house mouse); mmu04713: Circadian entrainment - Mus musculus (house mouse); mmu04723: Retrograde endocannabinoid signaling - Mus musculus (house mouse); mmu04724: Glutamatergic synapse - Mus musculus (house mouse); mmu04728: Dopaminergic synapse - Mus musculus (house mo…	GO:0001540: amyloid-beta binding; GO:0001919: regulation of receptor recycling; GO:0004970: ionotropic glutamate receptor activity; GO:0004971: AMPA glutamate receptor activity; GO:0004971: AMPA glutamate receptor activity; GO:0005216: ion channel activity; GO:0005515: protein binding; GO:0005886: plasma membrane; GO:0006811: ion transport; GO:0014069: postsynaptic density; GO:0015276: ligand-gat…
ENSMUSG00000038917	3930402G23Rik	55	27	63	0.3507	0.1809	0.3906	-2.34398	5.58877e-08	3.72159e-06	down	8	10974427	10978696	-	lncRNA	RIKEN cDNA 3930402G23 gene [Source:MGI Symbol%3BAcc:MGI:1921277]			GO:0003674: molecular_function; GO:0005575: cellular_component; GO:0008150: biological_process
ENSMUSG00000022474	Pmm1	64	45	61	0.6079	0.4493	0.5635	-1.48522	5.69672e-08	3.74803e-06	down	15	81835309	81845131	-	protein_coding	phosphomannomutase 1 [Source:MGI Symbol%3BAcc:MGI:1353418]	K17497: PMM; phosphomannomutase [EC:5.4.2.8]	mmu00051: Fructose and mannose metabolism - Mus musculus (house mouse); mmu00520: Amino sugar and nucleotide sugar metabolism - Mus musculus (house mouse); mmu01100: Metabolic pathways - Mus musculus (house mouse); mmu01240: Biosynthesis of cofactors - Mus musculus (house mouse); mmu01250: Biosynthesis of nucleotide sugars - Mus musculus (house mouse)	GO:0004615: phosphomannomutase activity; GO:0004615: phosphomannomutase activity; GO:0005737: cytoplasm; GO:0005829: cytosol; GO:0005829: cytosol; GO:0006013: mannose metabolic process; GO:0006013: mannose metabolic process; GO:0006487: protein N-linked glycosylation; GO:0009298: GDP-mannose biosynthetic process; GO:0016853: isomerase activity; GO:0043025: neuronal cell body; GO:0046872: metal io…
ENSMUSG00000025877	Hk3	237	201	201	1.7523	1.5621	1.4452	-1.66525	5.68485e-08	3.74803e-06	down	13	55153798	55169198	-	protein_coding	hexokinase 3 [Source:MGI Symbol%3BAcc:MGI:2670962]	K00844: HK; hexokinase [EC:2.7.1.1]	mmu00010: Glycolysis / Gluconeogenesis - Mus musculus (house mouse); mmu00051: Fructose and mannose metabolism - Mus musculus (house mouse); mmu00052: Galactose metabolism - Mus musculus (house mouse); mmu00500: Starch and sucrose metabolism - Mus musculus (house mouse); mmu00520: Amino sugar and nucleotide sugar metabolism - Mus musculus (house mouse); mmu00524: Neomycin, kanamycin and gentamici…	GO:0000166: nucleotide binding; GO:0001678: cellular glucose homeostasis; GO:0003824: catalytic activity; GO:0004340: glucokinase activity; GO:0004340: glucokinase activity; GO:0004396: hexokinase activity; GO:0005524: ATP binding; GO:0005536: glucose binding; GO:0005739: mitochondrion; GO:0005739: mitochondrion; GO:0005829: cytosol; GO:0005975: carbohydrate metabolic process; GO:0006002: fructos…
ENSMUSG00000036545	Adamts2	512	390	416	1.493	1.1954	1.1796	1.43184	5.70125e-08	3.74803e-06	up	11	50492911	50698400	+	protein_coding	a disintegrin-like and metallopeptidase (reprolysin type) with thrombospondin type 1 motif%2C 2 [Source:MGI Symbol%3BAcc:MGI:1347356]	K08618: ADAMTS2; a disintegrin and metalloproteinase with thrombospondin motifs 2 [EC:3.4.24.14]		GO:0004222: metalloendopeptidase activity; GO:0005576: extracellular region; GO:0006508: proteolysis; GO:0007283: spermatogenesis; GO:0008233: peptidase activity; GO:0008237: metallopeptidase activity; GO:0008270: zinc ion binding; GO:0016485: protein processing; GO:0016787: hydrolase activity; GO:0030198: extracellular matrix organization; GO:0030199: collagen fibril organization; GO:0030324: lu…
ENSMUSG00000018042	Cyb5r3	22204	20361	23332	140.639	135.558	143.712	0.96676	5.92971e-08	3.8817e-06	false	15	83037695	83056793	-	protein_coding	cytochrome b5 reductase 3 [Source:MGI Symbol%3BAcc:MGI:94893]	K00326: CYB5R; cytochrome-b5 reductase [EC:1.6.2.2]	mmu00520: Amino sugar and nucleotide sugar metabolism - Mus musculus (house mouse)	GO:0004128: cytochrome-b5 reductase activity, acting on NAD(P)H; GO:0005515: protein binding; GO:0005737: cytoplasm; GO:0005739: mitochondrion; GO:0005741: mitochondrial outer membrane; GO:0005743: mitochondrial inner membrane; GO:0005783: endoplasmic reticulum; GO:0005789: endoplasmic reticulum membrane; GO:0005811: lipid droplet; GO:0006629: lipid metabolic process; GO:0006694: steroid biosynth…
ENSMUSG00000079164	Tlr5	135	91	87	0.708	0.5016	0.4437	-1.57734	6.02478e-08	3.92729e-06	down	1	182782353	182804010	+	protein_coding	toll-like receptor 5 [Source:MGI Symbol%3BAcc:MGI:1858171]	K10168: TLR5; toll-like receptor 5	mmu04620: Toll-like receptor signaling pathway - Mus musculus (house mouse); mmu05132: Salmonella infection - Mus musculus (house mouse); mmu05134: Legionellosis - Mus musculus (house mouse); mmu05321: Inflammatory bowel disease - Mus musculus (house mouse)	GO:0001817: regulation of cytokine production; GO:0001819: positive regulation of cytokine production; GO:0002224: toll-like receptor signaling pathway; GO:0002376: immune system process; GO:0002755: MyD88-dependent toll-like receptor signaling pathway; GO:0004888: transmembrane signaling receptor activity; GO:0005149: interleukin-1 receptor binding; GO:0005515: protein binding; GO:0005887: integ…
ENSMUSG00000029167	Ppargc1a	709	636	580	2.928	2.7608	2.3293	1.13286	6.05985e-08	3.93356e-06	up	5	51611592	51725068	-	protein_coding	peroxisome proliferative activated receptor%2C gamma%2C coactivator 1 alpha [Source:MGI Symbol%3BAcc:MGI:1342774]	K07202: PPARGC1A, PGC1A; alpha peroxisome proliferator-activated receptor gamma coactivator 1-alpha	mmu04152: AMPK signaling pathway - Mus musculus (house mouse); mmu04211: Longevity regulating pathway - Mus musculus (house mouse); mmu04371: Apelin signaling pathway - Mus musculus (house mouse); mmu04714: Thermogenesis - Mus musculus (house mouse); mmu04910: Insulin signaling pathway - Mus musculus (house mouse); mmu04920: Adipocytokine signaling pathway - Mus musculus (house mouse); mmu04922: …	GO:0000785: chromatin; GO:0000791: euchromatin; GO:0001933: negative regulation of protein phosphorylation; GO:0002021: response to dietary excess; GO:0003676: nucleic acid binding; GO:0003677: DNA binding; GO:0003682: chromatin binding; GO:0003712: transcription coregulator activity; GO:0003713: transcription coactivator activity; GO:0003713: transcription coactivator activity; GO:0003713: trans…
ENSMUSG00000026848	Tor1b	1409	1169	1382	7.2006	6.2795	6.868	-0.87597	6.12687e-08	3.96042e-06	false	2	30842971	30849027	+	protein_coding	torsin family 1%2C member B [Source:MGI Symbol%3BAcc:MGI:1353605]	K22990: TOR1; torsin-1		GO:0000166: nucleotide binding; GO:0005515: protein binding; GO:0005524: ATP binding; GO:0005634: nucleus; GO:0005635: nuclear envelope; GO:0005635: nuclear envelope; GO:0005635: nuclear envelope; GO:0005737: cytoplasm; GO:0005783: endoplasmic reticulum; GO:0005788: endoplasmic reticulum lumen; GO:0005788: endoplasmic reticulum lumen; GO:0005788: endoplasmic reticulum lumen; GO:0007029: endoplasm…
ENSMUSG00000005483	Dnajb1	935	773	829	7.9444	6.9037	6.8497	-1.56257	6.30799e-08	4.04365e-06	down	8	84334822	84339282	+	protein_coding	DnaJ heat shock protein family (Hsp40) member B1 [Source:MGI Symbol%3BAcc:MGI:1931874]	K09507: DNAJB1; DnaJ homolog subfamily B member 1	mmu04141: Protein processing in endoplasmic reticulum - Mus musculus (house mouse); mmu05164: Influenza A - Mus musculus (house mouse)	GO:0000122: negative regulation of transcription by RNA polymerase II; GO:0001671: ATPase activator activity; GO:0003714: transcription corepressor activity; GO:0003714: transcription corepressor activity; GO:0005634: nucleus; GO:0005654: nucleoplasm; GO:0005737: cytoplasm; GO:0005829: cytosol; GO:0005829: cytosol; GO:0006457: protein folding; GO:0030544: Hsp70 protein binding; GO:0030544: Hsp70 …
ENSMUSG00000035041	Creb3l3	13312	10612	12963	120.158	100.683	113.784	-0.79626	6.30424e-08	4.04365e-06	false	10	80920158	80934708	-	protein_coding	cAMP responsive element binding protein 3-like 3 [Source:MGI Symbol%3BAcc:MGI:2384786]	K09048: CREB3; cyclic AMP-responsive element-binding protein 3	mmu04022: cGMP-PKG signaling pathway - Mus musculus (house mouse); mmu04024: cAMP signaling pathway - Mus musculus (house mouse); mmu04151: PI3K-Akt signaling pathway - Mus musculus (house mouse); mmu04152: AMPK signaling pathway - Mus musculus (house mouse); mmu04211: Longevity regulating pathway - Mus musculus (house mouse); mmu04261: Adrenergic signaling in cardiomyocytes - Mus musculus (house…	GO:0000976: transcription cis-regulatory region binding; GO:0000977: RNA polymerase II transcription regulatory region sequence-specific DNA binding; GO:0000978: RNA polymerase II cis-regulatory region sequence-specific DNA binding; GO:0000981: DNA-binding transcription factor activity, RNA polymerase II-specific; GO:0001228: DNA-binding transcription activator activity, RNA polymerase II-specifi…	TF_bZIP
ENSMUSG00000037206	Islr	257	168	208	2.6048	1.7898	2.0501	1.64901	6.55496e-08	4.18461e-06	up	9	58063551	58111589	-	protein_coding	immunoglobulin superfamily containing leucine-rich repeat [Source:MGI Symbol%3BAcc:MGI:1349645]	K25566: ISLR; immunoglobulin superfamily containing leucine-rich repeat protein		GO:0005576: extracellular region; GO:0005615: extracellular space
ENSMUSG00000026489	Coq8a	21450	24789	21555	110.323	134.014	107.809	1.23792	6.74668e-08	4.28928e-06	up	1	179992803	180027167	-	protein_coding	coenzyme Q8A [Source:MGI Symbol%3BAcc:MGI:1914676]	K08869: ADCK, ABC1; aarF domain-containing kinase		GO:0000166: nucleotide binding; GO:0005524: ATP binding; GO:0005739: mitochondrion; GO:0005739: mitochondrion; GO:0006744: ubiquinone biosynthetic process; GO:0006744: ubiquinone biosynthetic process; GO:0016020: membrane; GO:0016021: integral component of membrane; GO:0016301: kinase activity; GO:0016301: kinase activity; GO:0016310: phosphorylation; GO:0016740: transferase activity; GO:0031314:…
ENSMUSG00000074476	Spc24	318	481	307	3.3646	5.3493	3.1587	1.69698	6.90968e-08	4.3749e-06	up	9	21666738	21671599	-	protein_coding	SPC24%2C NDC80 kinetochore complex component%2C homolog (S. cerevisiae) [Source:MGI Symbol%3BAcc:MGI:1914879]	K11549: SPBC24, SPC24; kinetochore protein Spc24, animal type		GO:0000775: chromosome, centromeric region; GO:0000776: kinetochore; GO:0005634: nucleus; GO:0005654: nucleoplasm; GO:0005694: chromosome; GO:0005730: nucleolus; GO:0007049: cell cycle; GO:0007059: chromosome segregation; GO:0007059: chromosome segregation; GO:0007094: mitotic spindle assembly checkpoint signaling; GO:0008017: microtubule binding; GO:0008608: attachment of spindle microtubules to…
ENSMUSG00000028671	Gale	964	1596	1202	11.0731	19.2698	13.4265	1.53628	7.04853e-08	4.41941e-06	up	4	135691038	135695489	+	protein_coding	galactose-4-epimerase%2C UDP [Source:MGI Symbol%3BAcc:MGI:1921496]	K01784: galE, GALE; UDP-glucose 4-epimerase [EC:5.1.3.2]	mmu00052: Galactose metabolism - Mus musculus (house mouse); mmu00520: Amino sugar and nucleotide sugar metabolism - Mus musculus (house mouse); mmu01100: Metabolic pathways - Mus musculus (house mouse); mmu01250: Biosynthesis of nucleotide sugars - Mus musculus (house mouse)	GO:0003974: UDP-N-acetylglucosamine 4-epimerase activity; GO:0003978: UDP-glucose 4-epimerase activity; GO:0003978: UDP-glucose 4-epimerase activity; GO:0003978: UDP-glucose 4-epimerase activity; GO:0003978: UDP-glucose 4-epimerase activity; GO:0005829: cytosol; GO:0005975: carbohydrate metabolic process; GO:0006012: galactose metabolic process; GO:0016853: isomerase activity; GO:0019388: galacto…
ENSMUSG00000029122	Evc	191	229	227	0.6752	0.8509	0.7803	1.54457	7.04169e-08	4.41941e-06	up	5	37446442	37494238	-	protein_coding	EvC ciliary complex subunit 1 [Source:MGI Symbol%3BAcc:MGI:1890596]	K19605: EVC1; ellis van creveld syndrome protein 1	mmu04340: Hedgehog signaling pathway - Mus musculus (house mouse)	GO:0003416: endochondral bone growth; GO:0005515: protein binding; GO:0005737: cytoplasm; GO:0005856: cytoskeleton; GO:0005886: plasma membrane; GO:0005929: cilium; GO:0005929: cilium; GO:0007224: smoothened signaling pathway; GO:0016020: membrane; GO:0016021: integral component of membrane; GO:0036064: ciliary basal body; GO:0042995: cell projection; GO:0045880: positive regulation of smoothened…
ENSMUSG00000035697	Arhgap45	935	856	1003	5.6842	5.4699	5.9296	0.91567	7.0944e-08	4.41941e-06	false	10	79852487	79867306	+	protein_coding	Rho GTPase activating protein 45 [Source:MGI Symbol%3BAcc:MGI:1917969]	K20644: ARHGAP29_45; Rho GTPase-activating protein 29/45		GO:0005096: GTPase activator activity; GO:0005737: cytoplasm; GO:0005829: cytosol; GO:0005886: plasma membrane; GO:0007165: signal transduction; GO:0016020: membrane; GO:0016020: membrane; GO:0035556: intracellular signal transduction; GO:0042995: cell projection; GO:0046872: metal ion binding; GO:0090630: activation of GTPase activity
ENSMUSG00000060803	Gstp1	15483	13140	18473	272.286	242.894	315.918	-1.59081	7.08748e-08	4.41941e-06	down	19	4085407	4087985	-	protein_coding	glutathione S-transferase%2C pi 1 [Source:MGI Symbol%3BAcc:MGI:95865]	K23790: GSTP; glutathione S-transferase P [EC:2.5.1.18]	mmu00480: Glutathione metabolism - Mus musculus (house mouse); mmu00980: Metabolism of xenobiotics by cytochrome P450 - Mus musculus (house mouse); mmu00982: Drug metabolism - cytochrome P450 - Mus musculus (house mouse); mmu00983: Drug metabolism - other enzymes - Mus musculus (house mouse); mmu01100: Metabolic pathways - Mus musculus (house mouse); mmu01524: Platinum drug resistance - Mus muscu…	GO:0000302: response to reactive oxygen species; GO:0002674: negative regulation of acute inflammatory response; GO:0004364: glutathione transferase activity; GO:0004364: glutathione transferase activity; GO:0004364: glutathione transferase activity; GO:0004602: glutathione peroxidase activity; GO:0005504: fatty acid binding; GO:0005634: nucleus; GO:0005737: cytoplasm; GO:0005739: mitochondrion; …
ENSMUSG00000054675	Tmem119	69	66	55	0.8114	0.8158	0.629	2.97248	7.22345e-08	4.4638e-06	up	5	113931790	113938577	-	protein_coding	transmembrane protein 119 [Source:MGI Symbol%3BAcc:MGI:2385228]			GO:0001503: ossification; GO:0001649: osteoblast differentiation; GO:0001649: osteoblast differentiation; GO:0001934: positive regulation of protein phosphorylation; GO:0001958: endochondral ossification; GO:0005515: protein binding; GO:0005737: cytoplasm; GO:0005783: endoplasmic reticulum; GO:0005886: plasma membrane; GO:0005886: plasma membrane; GO:0005886: plasma membrane; GO:0007283: spermato…
ENSMUSG00000071719	Nalf2	1	2	1	0.007	0.0146	0.0068	-4.89376	7.22261e-08	4.4638e-06	down	X	98864627	98892396	+	protein_coding	NALCN channel auxiliary factor 2 [Source:MGI Symbol%3BAcc:MGI:3648377]			GO:0005886: plasma membrane; GO:0015275: stretch-activated, cation-selective, calcium channel activity; GO:0016020: membrane; GO:0016021: integral component of membrane; GO:0098703: calcium ion import across plasma membrane
ENSMUSG00000004044	Cavin1	366	336	324	2.7777	2.6804	2.3912	1.36584	7.40771e-08	4.54134e-06	up	11	100847559	100861713	-	protein_coding	caveolae associated 1 [Source:MGI Symbol%3BAcc:MGI:1277968]	K19387: PTRF; polymerase I and transcript release factor		GO:0003723: RNA binding; GO:0005515: protein binding; GO:0005634: nucleus; GO:0005634: nucleus; GO:0005634: nucleus; GO:0005737: cytoplasm; GO:0005737: cytoplasm; GO:0005737: cytoplasm; GO:0005739: mitochondrion; GO:0005739: mitochondrion; GO:0005783: endoplasmic reticulum; GO:0005886: plasma membrane; GO:0005901: caveola; GO:0005901: caveola; GO:0005901: caveola; GO:0005901: caveola; GO:0006353:…
ENSMUSG00000042985	Upk3b	109	78	37	0.8406	0.6323	0.2775	4.76417	7.40512e-08	4.54134e-06	up	5	136067350	136075341	+	protein_coding	uroplakin 3B [Source:MGI Symbol%3BAcc:MGI:2140882]			GO:0005886: plasma membrane; GO:0010629: negative regulation of gene expression; GO:0016020: membrane; GO:0016021: integral component of membrane; GO:0046325: negative regulation of glucose import
ENSMUSG00000024299	Adamts10	507	482	530	1.6722	1.671	1.6999	1.09744	8.4043e-08	5.13194e-06	up	17	33743178	33772756	+	protein_coding	a disintegrin-like and metallopeptidase (reprolysin type) with thrombospondin type 1 motif%2C 10 [Source:MGI Symbol%3BAcc:MGI:2449112]	K08625: ADAMTS10; a disintegrin and metalloproteinase with thrombospondin motifs 10 [EC:3.4.24.-]		GO:0001527: microfibril; GO:0004222: metalloendopeptidase activity; GO:0005576: extracellular region; GO:0006508: proteolysis; GO:0008233: peptidase activity; GO:0008237: metallopeptidase activity; GO:0016787: hydrolase activity; GO:0030198: extracellular matrix organization; GO:0031012: extracellular matrix; GO:0046872: metal ion binding; GO:0062023: collagen-containing extracellular matrix
ENSMUSG00000039114	Nrn1	7433	7360	5999	89.9736	93.6442	70.6149	0.96911	8.45024e-08	5.13967e-06	false	13	36909335	36919105	-	protein_coding	neuritin 1 [Source:MGI Symbol%3BAcc:MGI:1915654]			GO:0005515: protein binding; GO:0005615: extracellular space; GO:0005886: plasma membrane; GO:0007399: nervous system development; GO:0007409: axonogenesis; GO:0016020: membrane; GO:0030054: cell junction; GO:0031225: anchored component of membrane; GO:0032281: AMPA glutamate receptor complex; GO:0042802: identical protein binding; GO:0045202: synapse; GO:0046658: anchored component of plasma mem…
ENSMUSG00000025265	Fgd1	112	114	75	0.6183	0.6615	0.4027	2.18681	8.75068e-08	5.28083e-06	up	X	149829146	149872517	+	protein_coding	FYVE%2C RhoGEF and PH domain containing 1 [Source:MGI Symbol%3BAcc:MGI:104566]	K05720: FGD1; FYVE, RhoGEF and PH domain containing 1	mmu04810: Regulation of actin cytoskeleton - Mus musculus (house mouse)	GO:0001726: ruffle; GO:0005085: guanyl-nucleotide exchange factor activity; GO:0005515: protein binding; GO:0005737: cytoplasm; GO:0005737: cytoplasm; GO:0005794: Golgi apparatus; GO:0005856: cytoskeleton; GO:0007010: cytoskeleton organization; GO:0007010: cytoskeleton organization; GO:0008360: regulation of cell shape; GO:0030027: lamellipodium; GO:0030036: actin cytoskeleton organization; GO:00…
ENSMUSG00000056978	Hamp2	1936	1474	3844	90.4019	72.3472	174.551	4.90167	8.74548e-08	5.28083e-06	up	7	30621797	30624106	-	protein_coding	hepcidin antimicrobial peptide 2 [Source:MGI Symbol%3BAcc:MGI:2153530]	K23106: HAMP; hepcidin	mmu04350: TGF-beta signaling pathway - Mus musculus (house mouse)	GO:0002092: positive regulation of receptor internalization; GO:0005102: signaling receptor binding; GO:0005179: hormone activity; GO:0005576: extracellular region; GO:0005615: extracellular space; GO:0005615: extracellular space; GO:0005737: cytoplasm; GO:0006879: cellular iron ion homeostasis; GO:0006879: cellular iron ion homeostasis; GO:0010039: response to iron ion; GO:0014704: intercalated …
ENSMUSG00000029314	Gpat3	213	178	231	1.6558	1.4544	1.7462	-1.28284	8.99224e-08	5.40549e-06	down	5	100993579	101046968	+	protein_coding	glycerol-3-phosphate acyltransferase 3 [Source:MGI Symbol%3BAcc:MGI:3603816]	K13506: GPAT3_4, AGPAT9, AGPAT6; glycerol-3-phosphate O-acyltransferase 3/4 [EC:2.3.1.15]	mmu00561: Glycerolipid metabolism - Mus musculus (house mouse); mmu00564: Glycerophospholipid metabolism - Mus musculus (house mouse); mmu01100: Metabolic pathways - Mus musculus (house mouse)	GO:0003841: 1-acylglycerol-3-phosphate O-acyltransferase activity; GO:0004366: glycerol-3-phosphate O-acyltransferase activity; GO:0005515: protein binding; GO:0005783: endoplasmic reticulum; GO:0005783: endoplasmic reticulum; GO:0005789: endoplasmic reticulum membrane; GO:0006072: glycerol-3-phosphate metabolic process; GO:0006629: lipid metabolic process; GO:0008654: phospholipid biosynthetic p…
ENSMUSG00000026574	Dpt	387	360	310	6.111	5.9753	4.7603	2.14024	9.09607e-08	5.44671e-06	up	1	164624213	164651835	+	protein_coding	dermatopontin [Source:MGI Symbol%3BAcc:MGI:1928392]	K25512: DPT; dermatopontin		GO:0005201: extracellular matrix structural constituent; GO:0005576: extracellular region; GO:0007155: cell adhesion; GO:0008285: negative regulation of cell population proliferation; GO:0030199: collagen fibril organization; GO:0030199: collagen fibril organization; GO:0062023: collagen-containing extracellular matrix
ENSMUSG00000055782	Abcd2	1237	1024	967	5.6635	4.928	4.3054	1.62171	9.62061e-08	5.73857e-06	up	15	91030074	91076002	-	protein_coding	ATP-binding cassette%2C sub-family D (ALD)%2C member 2 [Source:MGI Symbol%3BAcc:MGI:1349467]	K05676: ABCD2, ALDL1; ATP-binding cassette, subfamily D (ALD), member 2 [EC:7.6.2.4]	mmu02010: ABC transporters - Mus musculus (house mouse); mmu04146: Peroxisome - Mus musculus (house mouse)	GO:0000038: very long-chain fatty acid metabolic process; GO:0000166: nucleotide binding; GO:0005324: long-chain fatty acid transporter activity; GO:0005515: protein binding; GO:0005524: ATP binding; GO:0005739: mitochondrion; GO:0005777: peroxisome; GO:0005777: peroxisome; GO:0005778: peroxisomal membrane; GO:0005778: peroxisomal membrane; GO:0006629: lipid metabolic process; GO:0006635: fatty a…
ENSMUSG00000040596	Pogk	234	204	238	0.6645	0.609	0.6573	-0.97054	1.0291e-07	6.11485e-06	false	1	166212191	166237432	-	protein_coding	pogo transposable element with KRAB domain [Source:MGI Symbol%3BAcc:MGI:1918842]			GO:0003674: molecular_function; GO:0003676: nucleic acid binding; GO:0003677: DNA binding; GO:0005634: nucleus; GO:0005654: nucleoplasm; GO:0006355: regulation of DNA-templated transcription; GO:0007275: multicellular organism development; GO:0008150: biological_process
ENSMUSG00000021214	Akr1c18	58	108	60	1.3082	2.5604	1.316	6.70634	1.09074e-07	6.45625e-06	up	13	4182614	4200653	-	protein_coding	aldo-keto reductase family 1%2C member C18 [Source:MGI Symbol%3BAcc:MGI:2145420]	K05295: E1.1.1.149; 20alpha-hydroxysteroid dehydrogenase [EC:1.1.1.149]	mmu00140: Steroid hormone biosynthesis - Mus musculus (house mouse); mmu01100: Metabolic pathways - Mus musculus (house mouse)	GO:0001758: retinal dehydrogenase activity; GO:0004032: alditol:NADP+ 1-oxidoreductase activity; GO:0004032: alditol:NADP+ 1-oxidoreductase activity; GO:0004033: aldo-keto reductase (NADP) activity; GO:0004745: NAD-retinol dehydrogenase activity; GO:0005634: nucleus; GO:0005737: cytoplasm; GO:0005829: cytosol; GO:0005829: cytosol; GO:0006693: prostaglandin metabolic process; GO:0006709: progester…
ENSMUSG00000102252	Snrpn	277	295	264	3.4928	3.9099	3.2371	1.40985	1.10103e-07	6.49228e-06	up	7	59632243	59789967	-	protein_coding	small nuclear ribonucleoprotein N [Source:MGI Symbol%3BAcc:MGI:98347]	K11100: SNRPN, SMN; small nuclear ribonucleoprotein N		GO:0000398: mRNA splicing, via spliceosome; GO:0003723: RNA binding; GO:0005634: nucleus; GO:0005654: nucleoplasm; GO:0005682: U5 snRNP; GO:0005685: U1 snRNP; GO:0005686: U2 snRNP; GO:0005687: U4 snRNP; GO:0005737: cytoplasm; GO:0046540: U4/U6 x U5 tri-snRNP complex; GO:0071004: U2-type prespliceosome; GO:0071013: catalytic step 2 spliceosome
ENSMUSG00000118669	Arvcf	770	642	688	3.1217	2.7358	2.7124	0.93284	1.16008e-07	6.8145e-06	false	16	18166046	18225826	+	protein_coding	armadillo repeat gene deleted in velocardiofacial syndrome [Source:MGI Symbol%3BAcc:MGI:109620]			GO:0005515: protein binding; GO:0005634: nucleus; GO:0005634: nucleus; GO:0005737: cytoplasm; GO:0005737: cytoplasm; GO:0005886: plasma membrane; GO:0005886: plasma membrane; GO:0005912: adherens junction; GO:0007043: cell-cell junction assembly; GO:0007155: cell adhesion; GO:0007275: multicellular organism development; GO:0016339: calcium-dependent cell-cell adhesion via plasma membrane cell adh…
ENSMUSG00000006398	Cdc20	102	519	102	1.4865	7.9503	1.4455	3.45381	1.17409e-07	6.87064e-06	up	4	118290098	118294549	-	protein_coding	cell division cycle 20 [Source:MGI Symbol%3BAcc:MGI:1859866]	K03363: CDC20; cell division cycle 20, cofactor of APC complex	mmu04110: Cell cycle - Mus musculus (house mouse); mmu04114: Oocyte meiosis - Mus musculus (house mouse); mmu04120: Ubiquitin mediated proteolysis - Mus musculus (house mouse); mmu05166: Human T-cell leukemia virus 1 infection - Mus musculus (house mouse); mmu05203: Viral carcinogenesis - Mus musculus (house mouse)	GO:0000089: mitotic metaphase; GO:0005515: protein binding; GO:0005654: nucleoplasm; GO:0005680: anaphase-promoting complex; GO:0005680: anaphase-promoting complex; GO:0005737: cytoplasm; GO:0005813: centrosome; GO:0005829: cytosol; GO:0005856: cytoskeleton; GO:0007049: cell cycle; GO:0007064: mitotic sister chromatid cohesion; GO:0007094: mitotic spindle assembly checkpoint signaling; GO:0007399…
ENSMUSG00000028597	Gpx7	85	123	96	1.7952	2.7305	1.9716	2.10932	1.18001e-07	6.87923e-06	up	4	108257587	108264158	-	protein_coding	glutathione peroxidase 7 [Source:MGI Symbol%3BAcc:MGI:1914555]	K00432: gpx, btuE, bsaA; glutathione peroxidase [EC:1.11.1.9]	mmu00480: Glutathione metabolism - Mus musculus (house mouse); mmu01100: Metabolic pathways - Mus musculus (house mouse); mmu04918: Thyroid hormone synthesis - Mus musculus (house mouse); mmu05014: Amyotrophic lateral sclerosis - Mus musculus (house mouse); mmu05016: Huntington disease - Mus musculus (house mouse); mmu05022: Pathways of neurodegeneration - multiple diseases - Mus musculus (house …	GO:0004096: catalase activity; GO:0004601: peroxidase activity; GO:0004601: peroxidase activity; GO:0004602: glutathione peroxidase activity; GO:0005576: extracellular region; GO:0005783: endoplasmic reticulum; GO:0006979: response to oxidative stress; GO:0016491: oxidoreductase activity
ENSMUSG00000038193	Hand2	236	202	286	2.7328	2.4586	3.2205	1.39889	1.2511e-07	7.26624e-06	up	8	57774018	57777668	+	protein_coding	heart and neural crest derivatives expressed 2 [Source:MGI Symbol%3BAcc:MGI:103580]	K18486: HAND2; heart-and neural crest derivatives-expressed protein 2		GO:0000785: chromatin; GO:0000976: transcription cis-regulatory region binding; GO:0000977: RNA polymerase II transcription regulatory region sequence-specific DNA binding; GO:0000977: RNA polymerase II transcription regulatory region sequence-specific DNA binding; GO:0000981: DNA-binding transcription factor activity, RNA polymerase II-specific; GO:0000981: DNA-binding transcription factor activ…	bHLH
ENSMUSG00000024538	Ppic	256	302	235	4.9673	6.1594	4.4342	1.49534	1.25749e-07	7.276e-06	up	18	53539404	53551187	-	protein_coding	peptidylprolyl isomerase C [Source:MGI Symbol%3BAcc:MGI:97751]	K09563: PPIC, CYPC; peptidyl-prolyl isomerase C (cyclophilin C) [EC:5.2.1.8]		GO:0000413: protein peptidyl-prolyl isomerization; GO:0000413: protein peptidyl-prolyl isomerization; GO:0000413: protein peptidyl-prolyl isomerization; GO:0003755: peptidyl-prolyl cis-trans isomerase activity; GO:0003755: peptidyl-prolyl cis-trans isomerase activity; GO:0003755: peptidyl-prolyl cis-trans isomerase activity; GO:0005515: protein binding; GO:0005737: cytoplasm; GO:0006457: protein …
ENSMUSG00000015451	C4a	170	418	226	0.7457	1.9273	0.9641	-2.37975	1.30035e-07	7.49595e-06	down	17	35028069	35042440	-	lncRNA	complement component 4A (Rodgers blood group) [Source:MGI Symbol%3BAcc:MGI:98320]	K03989: C4; complement component 4	mmu04610: Complement and coagulation cascades - Mus musculus (house mouse); mmu04936: Alcoholic liver disease - Mus musculus (house mouse); mmu05133: Pertussis - Mus musculus (house mouse); mmu05150: Staphylococcus aureus infection - Mus musculus (house mouse); mmu05171: Coronavirus disease - COVID-19 - Mus musculus (house mouse); mmu05322: Systemic lupus erythematosus - Mus musculus (house mouse)	GO:0005615: extracellular space; GO:0006956: complement activation
ENSMUSG00000028536	2610528J11Rik	379	445	374	8.5837	10.5937	8.2371	1.19031	1.31645e-07	7.56054e-06	up	4	118384196	118387425	+	protein_coding	RIKEN cDNA 2610528J11 gene [Source:MGI Symbol%3BAcc:MGI:1913701]			GO:0003674: molecular_function; GO:0005768: endosome; GO:0005886: plasma membrane; GO:0016020: membrane; GO:0016021: integral component of membrane
ENSMUSG00000063354	Slc39a4	4838	5129	4885	42.4038	47.2524	41.6361	0.93019	1.34374e-07	7.68868e-06	false	15	76496583	76501584	-	protein_coding	solute carrier family 39 (zinc transporter)%2C member 4 [Source:MGI Symbol%3BAcc:MGI:1919277]	K14710: SLC39A4, ZIP4; solute carrier family 39 (zinc transporter), member 4	mmu04978: Mineral absorption - Mus musculus (house mouse); mmu05010: Alzheimer disease - Mus musculus (house mouse); mmu05012: Parkinson disease - Mus musculus (house mouse)	GO:0005385: zinc ion transmembrane transporter activity; GO:0005385: zinc ion transmembrane transporter activity; GO:0005886: plasma membrane; GO:0005887: integral component of plasma membrane; GO:0006811: ion transport; GO:0006882: cellular zinc ion homeostasis; GO:0016020: membrane; GO:0016021: integral component of membrane; GO:0016324: apical plasma membrane; GO:0030001: metal ion transport; …
ENSMUSG00000020258	Glyctk	4724	4347	4248	30.4097	29.4134	26.5922	-0.91525	1.36235e-07	7.7664e-06	false	9	106030056	106035337	-	protein_coding	glycerate kinase [Source:MGI Symbol%3BAcc:MGI:2444085]	K11529: gck, gckA, GLYCTK; glycerate 2-kinase [EC:2.7.1.165]	mmu00030: Pentose phosphate pathway - Mus musculus (house mouse); mmu00260: Glycine, serine and threonine metabolism - Mus musculus (house mouse); mmu00561: Glycerolipid metabolism - Mus musculus (house mouse); mmu00630: Glyoxylate and dicarboxylate metabolism - Mus musculus (house mouse); mmu01100: Metabolic pathways - Mus musculus (house mouse); mmu01200: Carbon metabolism - Mus musculus (house…	GO:0000166: nucleotide binding; GO:0005524: ATP binding; GO:0005737: cytoplasm; GO:0005737: cytoplasm; GO:0005739: mitochondrion; GO:0005794: Golgi apparatus; GO:0005829: cytosol; GO:0006001: fructose catabolic process; GO:0006468: protein phosphorylation; GO:0006468: protein phosphorylation; GO:0008887: glycerate kinase activity; GO:0008887: glycerate kinase activity; GO:0016301: kinase activity…
ENSMUSG00000086610	Gm15408	134	168	209	1.2055	1.5887	1.8285	1.82906	1.38511e-07	7.86712e-06	up	5	148943737	148950256	+	lncRNA	predicted gene 15408 [Source:MGI Symbol%3BAcc:MGI:3705101]			GO:0003674: molecular_function; GO:0005575: cellular_component; GO:0008150: biological_process
ENSMUSG00000019505	Ubb	9410	9235	10529	152.938	157.767	166.41	-0.72444	1.46348e-07	8.28181e-06	false	11	62441997	62444039	+	protein_coding	ubiquitin B [Source:MGI Symbol%3BAcc:MGI:98888]	K04551: UBB; ubiquitin B	mmu04120: Ubiquitin mediated proteolysis - Mus musculus (house mouse); mmu04137: Mitophagy - animal - Mus musculus (house mouse); mmu05012: Parkinson disease - Mus musculus (house mouse); mmu05022: Pathways of neurodegeneration - multiple diseases - Mus musculus (house mouse); mmu05167: Kaposi sarcoma-associated herpesvirus infection - Mus musculus (house mouse)	GO:0005634: nucleus; GO:0005654: nucleoplasm; GO:0005737: cytoplasm; GO:0005739: mitochondrion; GO:0005741: mitochondrial outer membrane; GO:0005829: cytosol; GO:0007141: male meiosis I; GO:0007144: female meiosis I; GO:0008584: male gonad development; GO:0008585: female gonad development; GO:0016020: membrane; GO:0016567: protein ubiquitination; GO:0019941: modification-dependent protein catabol…
ENSMUSG00000001763	Tspan33	463	373	501	2.4263	2.0545	2.5531	-0.9686	1.53866e-07	8.67548e-06	false	6	29694221	29718558	+	protein_coding	tetraspanin 33 [Source:MGI Symbol%3BAcc:MGI:1919012]	K17346: TSPAN33; tetraspanin-33		GO:0005737: cytoplasm; GO:0005886: plasma membrane; GO:0005887: integral component of plasma membrane; GO:0009986: cell surface; GO:0016020: membrane; GO:0016021: integral component of membrane; GO:0019899: enzyme binding; GO:0019899: enzyme binding; GO:0030054: cell junction; GO:0046930: pore complex; GO:0046930: pore complex; GO:0046931: pore complex assembly; GO:0046931: pore complex assembly;…
ENSMUSG00000056952	Tatdn2	850	641	683	6.5219	5.1697	5.0962	-0.8849	1.59375e-07	8.95341e-06	false	6	113674011	113688030	+	protein_coding	TatD DNase domain containing 2 [Source:MGI Symbol%3BAcc:MGI:3576210]	K03424: tatD; TatD DNase family protein [EC:3.1.21.-]		GO:0003674: molecular_function; GO:0005575: cellular_component; GO:0008150: biological_process
ENSMUSG00000033917	Gde1	1829	1164	1766	29.4275	19.6854	27.6311	-1.21939	1.62743e-07	9.10949e-06	down	7	118287768	118305001	-	protein_coding	glycerophosphodiester phosphodiesterase 1 [Source:MGI Symbol%3BAcc:MGI:1891827]	K19179: GDE1; glycerophosphoinositol glycerophosphodiesterase [EC:3.1.4.44]		GO:0004622: lysophospholipase activity; GO:0005886: plasma membrane; GO:0005886: plasma membrane; GO:0005887: integral component of plasma membrane; GO:0006580: ethanolamine metabolic process; GO:0006580: ethanolamine metabolic process; GO:0006629: lipid metabolic process; GO:0006644: phospholipid metabolic process; GO:0006644: phospholipid metabolic process; GO:0007186: G protein-coupled recepto…
ENSMUSG00000068762	Gstm6	4356	4191	4668	59.6202	60.2942	62.1303	1.39119	1.78424e-07	9.91538e-06	up	3	107846163	107851065	-	protein_coding	glutathione S-transferase%2C mu 6 [Source:MGI Symbol%3BAcc:MGI:1309467]	K00799: GST, gst; glutathione S-transferase [EC:2.5.1.18]	mmu00480: Glutathione metabolism - Mus musculus (house mouse); mmu00980: Metabolism of xenobiotics by cytochrome P450 - Mus musculus (house mouse); mmu00982: Drug metabolism - cytochrome P450 - Mus musculus (house mouse); mmu00983: Drug metabolism - other enzymes - Mus musculus (house mouse); mmu01100: Metabolic pathways - Mus musculus (house mouse); mmu01524: Platinum drug resistance - Mus muscu…	GO:0004364: glutathione transferase activity; GO:0004364: glutathione transferase activity; GO:0005737: cytoplasm; GO:0005829: cytosol; GO:0006749: glutathione metabolic process; GO:0016740: transferase activity; GO:0019899: enzyme binding; GO:0042803: protein homodimerization activity; GO:0043295: glutathione binding; GO:0045171: intercellular bridge
ENSMUSG00000076431	Sox4	125	118	78	0.7097	0.7042	0.4306	2.09378	1.77869e-07	9.91538e-06	up	13	29132902	29137696	-	protein_coding	SRY (sex determining region Y)-box 4 [Source:MGI Symbol%3BAcc:MGI:98366]	K23581: SOX4; transcription factor SOX4 (SOX group C)	mmu05206: MicroRNAs in cancer - Mus musculus (house mouse)	GO:0000976: transcription cis-regulatory region binding; GO:0000978: RNA polymerase II cis-regulatory region sequence-specific DNA binding; GO:0000978: RNA polymerase II cis-regulatory region sequence-specific DNA binding; GO:0000978: RNA polymerase II cis-regulatory region sequence-specific DNA binding; GO:0000981: DNA-binding transcription factor activity, RNA polymerase II-specific; GO:0000981…	HMG
ENSMUSG00000024561	Mbd1	3368	2198	2707	13.5273	9.2794	10.5729	-1.04312	1.93168e-07	1.06963e-05	down	18	74400676	74415803	+	protein_coding	methyl-CpG binding domain protein 1 [Source:MGI Symbol%3BAcc:MGI:1333811]	K11589: MBD1; methyl-CpG-binding domain protein 1		GO:0000785: chromatin; GO:0000785: chromatin; GO:0000792: heterochromatin; GO:0003677: DNA binding; GO:0003682: chromatin binding; GO:0005515: protein binding; GO:0005634: nucleus; GO:0005634: nucleus; GO:0005694: chromosome; GO:0005737: cytoplasm; GO:0005737: cytoplasm; GO:0008270: zinc ion binding; GO:0008327: methyl-CpG binding; GO:0010385: double-stranded methylated DNA binding; GO:0010629: n…	MBD
ENSMUSG00000031594	Fgl1	7459	7771	7779	45.7958	50.1503	46.4446	-2.36872	2.00359e-07	1.10548e-05	down	8	41644471	41668193	-	protein_coding	fibrinogen-like protein 1 [Source:MGI Symbol%3BAcc:MGI:102795]	K25536: FGL1; fibrinogen-like protein 1		GO:0002250: adaptive immune response; GO:0002376: immune system process; GO:0005102: signaling receptor binding; GO:0005515: protein binding; GO:0005576: extracellular region; GO:0005576: extracellular region; GO:0005615: extracellular space; GO:0008203: cholesterol metabolic process; GO:0010906: regulation of glucose metabolic process; GO:0035634: response to stilbenoid; GO:0050776: regulation o…
ENSMUSG00000078687	Mup8	13	2	5	0.3589	0.058	0.1342	-3.46359	2.02932e-07	1.11569e-05	down	4	60218621	60222599	-	protein_coding	major urinary protein 8 [Source:MGI Symbol%3BAcc:MGI:3709619]			GO:0005549: odorant binding; GO:0005615: extracellular space; GO:0005615: extracellular space; GO:0008150: biological_process; GO:0097159: organic cyclic compound binding
ENSMUSG00000050737	Ptges	58	46	61	0.4017	0.3348	0.4108	3.36614	2.21696e-07	1.21453e-05	up	2	30779483	30819875	-	protein_coding	prostaglandin E synthase [Source:MGI Symbol%3BAcc:MGI:1927593]	K15729: PTGES; microsomal prostaglandin-E synthase 1 [EC:5.3.99.3]	mmu00590: Arachidonic acid metabolism - Mus musculus (house mouse); mmu01100: Metabolic pathways - Mus musculus (house mouse)	GO:0001516: prostaglandin biosynthetic process; GO:0001516: prostaglandin biosynthetic process; GO:0001516: prostaglandin biosynthetic process; GO:0004364: glutathione transferase activity; GO:0004602: glutathione peroxidase activity; GO:0004667: prostaglandin-D synthase activity; GO:0004667: prostaglandin-D synthase activity; GO:0004667: prostaglandin-D synthase activity; GO:0005641: nuclear env…
ENSMUSG00000037926	Ssh2	709	733	597	1.0422	1.1326	0.8534	-0.85754	2.26459e-07	1.23624e-05	false	11	77107113	77351046	+	protein_coding	slingshot protein phosphatase 2 [Source:MGI Symbol%3BAcc:MGI:2679255]	K05766: SSH; protein phosphatase slingshot [EC:3.1.3.16 3.1.3.48]	mmu04360: Axon guidance - Mus musculus (house mouse); mmu04810: Regulation of actin cytoskeleton - Mus musculus (house mouse)	GO:0003779: actin binding; GO:0003779: actin binding; GO:0004721: phosphoprotein phosphatase activity; GO:0004721: phosphoprotein phosphatase activity; GO:0004722: protein serine/threonine phosphatase activity; GO:0004725: protein tyrosine phosphatase activity; GO:0005737: cytoplasm; GO:0005856: cytoskeleton; GO:0006470: protein dephosphorylation; GO:0008138: protein tyrosine/serine/threonine pho…
ENSMUSG00000038725	Pkhd1l1	34	50	31	0.0499	0.0772	0.0443	6.69058	2.29785e-07	1.24998e-05	up	15	44320890	44464765	+	protein_coding	polycystic kidney and hepatic disease 1-like 1 [Source:MGI Symbol%3BAcc:MGI:2183153]			GO:0003674: molecular_function; GO:0007605: sensory perception of sound; GO:0016020: membrane; GO:0016021: integral component of membrane; GO:0032426: stereocilium tip; GO:0120234: stereocilium coat
ENSMUSG00000031561	Tenm3	312	152	193	0.8297	0.4249	0.4991	-1.44872	2.34305e-07	1.2701e-05	down	8	48680717	49296986	-	protein_coding	teneurin transmembrane protein 3 [Source:MGI Symbol%3BAcc:MGI:1345183]	K24473: TENM, ODZ; teneurin		GO:0005515: protein binding; GO:0005886: plasma membrane; GO:0005887: integral component of plasma membrane; GO:0005887: integral component of plasma membrane; GO:0007155: cell adhesion; GO:0007156: homophilic cell adhesion via plasma membrane adhesion molecules; GO:0007157: heterophilic cell-cell adhesion via plasma membrane cell adhesion molecules; GO:0007165: signal transduction; GO:0010976: p…
ENSMUSG00000023828	Slc22a3	43	39	51	0.2594	0.2473	0.2992	-1.5861	2.38243e-07	1.28693e-05	down	17	12637847	12726591	-	protein_coding	solute carrier family 22 (organic cation transporter)%2C member 3 [Source:MGI Symbol%3BAcc:MGI:1333817]	K08200: SLC22A3, OCT3; MFS transporter, OCT family, solute carrier family 22 (organic cation transporter), member 3	mmu05231: Choline metabolism in cancer - Mus musculus (house mouse)	GO:0005326: neurotransmitter transmembrane transporter activity; GO:0005326: neurotransmitter transmembrane transporter activity; GO:0005330: dopamine:sodium symporter activity; GO:0005886: plasma membrane; GO:0005887: integral component of plasma membrane; GO:0006811: ion transport; GO:0006836: neurotransmitter transport; GO:0006836: neurotransmitter transport; GO:0006837: serotonin transport; G…
ENSMUSG00000008398	Elk3	556	649	477	3.3266	4.0816	2.7753	1.39305	2.505e-07	1.34842e-05	up	10	93083276	93146997	-	protein_coding	ELK3%2C member of ETS oncogene family [Source:MGI Symbol%3BAcc:MGI:101762]	K09430: ELK3; ETS domain-containing protein Elk-3 (SRF accessory protein 2)		GO:0000978: RNA polymerase II cis-regulatory region sequence-specific DNA binding; GO:0000981: DNA-binding transcription factor activity, RNA polymerase II-specific; GO:0001227: DNA-binding transcription repressor activity, RNA polymerase II-specific; GO:0001228: DNA-binding transcription activator activity, RNA polymerase II-specific; GO:0001525: angiogenesis; GO:0003677: DNA binding; GO:0003700…	ETS
ENSMUSG00000040562	Gstm2	2320	2678	2745	37.6165	45.6407	43.2812	1.07513	2.5306e-07	1.35278e-05	up	3	107889018	107893769	-	protein_coding	glutathione S-transferase%2C mu 2 [Source:MGI Symbol%3BAcc:MGI:95861]	K00799: GST, gst; glutathione S-transferase [EC:2.5.1.18]	mmu00480: Glutathione metabolism - Mus musculus (house mouse); mmu00980: Metabolism of xenobiotics by cytochrome P450 - Mus musculus (house mouse); mmu00982: Drug metabolism - cytochrome P450 - Mus musculus (house mouse); mmu00983: Drug metabolism - other enzymes - Mus musculus (house mouse); mmu01100: Metabolic pathways - Mus musculus (house mouse); mmu01524: Platinum drug resistance - Mus muscu…	GO:0004364: glutathione transferase activity; GO:0004364: glutathione transferase activity; GO:0004364: glutathione transferase activity; GO:0005515: protein binding; GO:0005737: cytoplasm; GO:0005829: cytosol; GO:0005886: plasma membrane; GO:0006629: lipid metabolic process; GO:0006749: glutathione metabolic process; GO:0006749: glutathione metabolic process; GO:0016740: transferase activity; GO…
ENSMUSG00000063011	Msln	110	57	44	0.9773	0.5323	0.3802	6.59047	2.52311e-07	1.35278e-05	up	17	25967587	25973352	-	protein_coding	mesothelin [Source:MGI Symbol%3BAcc:MGI:1888992]	K20733: MSLN; mesothelin		GO:0005515: protein binding; GO:0005576: extracellular region; GO:0005615: extracellular space; GO:0005615: extracellular space; GO:0005794: Golgi apparatus; GO:0005886: plasma membrane; GO:0007155: cell adhesion; GO:0007160: cell-matrix adhesion; GO:0009986: cell surface; GO:0009986: cell surface; GO:0016020: membrane; GO:0031225: anchored component of membrane
ENSMUSG00000035948	Acss3	589	379	307	2.2283	1.5071	1.1294	1.8455	2.60852e-07	1.38962e-05	up	10	106769378	106959529	-	protein_coding	acyl-CoA synthetase short-chain family member 3 [Source:MGI Symbol%3BAcc:MGI:2685720]	K01908: ACSS3, prpE; propionyl-CoA synthetase [EC:6.2.1.17]	mmu00640: Propanoate metabolism - Mus musculus (house mouse); mmu01100: Metabolic pathways - Mus musculus (house mouse)	GO:0000166: nucleotide binding; GO:0003674: molecular_function; GO:0003987: acetate-CoA ligase activity; GO:0005524: ATP binding; GO:0005739: mitochondrion; GO:0005739: mitochondrion; GO:0005759: mitochondrial matrix; GO:0005759: mitochondrial matrix; GO:0006629: lipid metabolic process; GO:0008150: biological_process; GO:0016874: ligase activity; GO:0043231: intracellular membrane-bounded organe…
ENSMUSG00000052133	Sema5b	32	22	32	0.123	0.0889	0.1197	-1.8096	2.63411e-07	1.39843e-05	down	16	35361515	35485102	+	protein_coding	sema domain%2C seven thrombospondin repeats (type 1 and type 1-like)%2C transmembrane domain (TM) and short cytoplasmic domain%2C (semaphorin) 5B [Source:MGI Symbol%3BAcc:MGI:107555]	K06841: SEMA5; semaphorin 5	mmu04360: Axon guidance - Mus musculus (house mouse)	GO:0001755: neural crest cell migration; GO:0007275: multicellular organism development; GO:0007399: nervous system development; GO:0007411: axon guidance; GO:0016020: membrane; GO:0016021: integral component of membrane; GO:0030154: cell differentiation; GO:0030215: semaphorin receptor binding; GO:0030335: positive regulation of cell migration; GO:0045499: chemorepellent activity; GO:0048675: ax…
ENSMUSG00000029581	Fscn1	219	348	289	1.9794	3.3061	2.5401	1.71324	2.66619e-07	1.41061e-05	up	5	142946098	142958940	+	protein_coding	fascin actin-bundling protein 1 [Source:MGI Symbol%3BAcc:MGI:1352745]	K23551: FSCN1; fascin 1	mmu05206: MicroRNAs in cancer - Mus musculus (house mouse)	GO:0001725: stress fiber; GO:0001726: ruffle; GO:0001726: ruffle; GO:0002102: podosome; GO:0003779: actin binding; GO:0005515: protein binding; GO:0005737: cytoplasm; GO:0005737: cytoplasm; GO:0005829: cytosol; GO:0005856: cytoskeleton; GO:0005886: plasma membrane; GO:0005902: microvillus; GO:0005902: microvillus; GO:0005911: cell-cell junction; GO:0007015: actin filament organization; GO:0007043…
ENSMUSG00000023963	Cyp39a1	3284	2385	3151	29.2831	22.3539	27.323	1.02388	2.71444e-07	1.43124e-05	up	17	43978316	44062322	+	protein_coding	cytochrome P450%2C family 39%2C subfamily a%2C polypeptide 1 [Source:MGI Symbol%3BAcc:MGI:1927096]	K07439: CYP39A1; 24-hydroxycholesterol 7alpha-hydroxylase [EC:1.14.14.26]	mmu00120: Primary bile acid biosynthesis - Mus musculus (house mouse)	GO:0004497: monooxygenase activity; GO:0005506: iron ion binding; GO:0005783: endoplasmic reticulum; GO:0006629: lipid metabolic process; GO:0006699: bile acid biosynthetic process; GO:0006699: bile acid biosynthetic process; GO:0006699: bile acid biosynthetic process; GO:0006707: cholesterol catabolic process; GO:0007586: digestion; GO:0008202: steroid metabolic process; GO:0008387: steroid 7-al…
ENSMUSG00000030499	Kctd15	322	285	321	2.0684	1.9243	2.0052	-1.1693	2.76172e-07	1.45122e-05	down	7	34338439	34356157	-	protein_coding	potassium channel tetramerisation domain containing 15 [Source:MGI Symbol%3BAcc:MGI:2385276]	K21754: KCTD1_15; BTB/POZ domain-containing protein KCTD1/15		GO:0003674: molecular_function; GO:0005634: nucleus; GO:0007275: multicellular organism development; GO:0008150: biological_process; GO:0042802: identical protein binding; GO:0051260: protein homooligomerization
ENSMUSG00000056666	Retsat	19027	12887	17374	146.445	104.258	130.038	-1.26297	2.80019e-07	1.46644e-05	down	6	72575458	72585408	+	protein_coding	retinol saturase (all trans retinol 13%2C14 reductase) [Source:MGI Symbol%3BAcc:MGI:1914692]	K09516: RETSAT; all-trans-retinol 13,14-reductase [EC:1.3.99.23]	mmu00830: Retinol metabolism - Mus musculus (house mouse)	GO:0005640: nuclear outer membrane; GO:0005783: endoplasmic reticulum; GO:0005789: endoplasmic reticulum membrane; GO:0005789: endoplasmic reticulum membrane; GO:0005789: endoplasmic reticulum membrane; GO:0006629: lipid metabolic process; GO:0016020: membrane; GO:0016491: oxidoreductase activity; GO:0016491: oxidoreductase activity; GO:0031965: nuclear membrane; GO:0042572: retinol metabolic pro…
ENSMUSG00000050248	Evc2	152	180	158	0.7089	0.8824	0.7166	1.67516	2.96355e-07	1.54675e-05	up	5	37495843	37582399	+	protein_coding	EvC ciliary complex subunit 2 [Source:MGI Symbol%3BAcc:MGI:1915775]	K19608: EVC2; ellis van creveld syndrome protein 2	mmu04340: Hedgehog signaling pathway - Mus musculus (house mouse)	GO:0005515: protein binding; GO:0005634: nucleus; GO:0005737: cytoplasm; GO:0005856: cytoskeleton; GO:0005886: plasma membrane; GO:0005929: cilium; GO:0007224: smoothened signaling pathway; GO:0016020: membrane; GO:0016021: integral component of membrane; GO:0042995: cell projection; GO:0060170: ciliary membrane; GO:0060170: ciliary membrane; GO:0060170: ciliary membrane; GO:0098797: plasma membr…
ENSMUSG00000031886	Ces2e	12501	13533	11134	126.091	143.477	109.208	1.5674	3.01244e-07	1.56697e-05	up	8	105652892	105661304	+	protein_coding	carboxylesterase 2E [Source:MGI Symbol%3BAcc:MGI:2443170]	K03927: CES2; carboxylesterase 2 [EC:3.1.1.1 3.1.1.84 3.1.1.56]	mmu00983: Drug metabolism - other enzymes - Mus musculus (house mouse)	GO:0005783: endoplasmic reticulum; GO:0006693: prostaglandin metabolic process; GO:0016787: hydrolase activity; GO:0043231: intracellular membrane-bounded organelle; GO:0052689: carboxylic ester hydrolase activity; GO:0052689: carboxylic ester hydrolase activity; GO:0052689: carboxylic ester hydrolase activity; GO:0102209: trans-permethrin hydrolase activity
ENSMUSG00000038217	Tlcd2	3770	3402	3432	53.0123	50.283	46.9298	1.05568	3.08035e-07	1.59692e-05	up	11	75352541	75361725	+	protein_coding	TLC domain containing 2 [Source:MGI Symbol%3BAcc:MGI:1917141]			GO:0003674: molecular_function; GO:0005886: plasma membrane; GO:0005886: plasma membrane; GO:0007009: plasma membrane organization; GO:0007009: plasma membrane organization; GO:0016020: membrane; GO:0016021: integral component of membrane; GO:0055088: lipid homeostasis; GO:0055091: phospholipid homeostasis; GO:0055091: phospholipid homeostasis; GO:0071709: membrane assembly; GO:0071709: membrane …
ENSMUSG00000027164	Traf6	482	421	419	1.6645	1.5282	1.4071	-0.84992	3.19567e-07	1.64566e-05	false	2	101508774	101532014	+	protein_coding	TNF receptor-associated factor 6 [Source:MGI Symbol%3BAcc:MGI:108072]	K03175: TRAF6; TNF receptor-associated factor 6 [EC:2.3.2.27]	mmu04010: MAPK signaling pathway - Mus musculus (house mouse); mmu04064: NF-kappa B signaling pathway - Mus musculus (house mouse); mmu04120: Ubiquitin mediated proteolysis - Mus musculus (house mouse); mmu04140: Autophagy - animal - Mus musculus (house mouse); mmu04144: Endocytosis - Mus musculus (house mouse); mmu04380: Osteoclast differentiation - Mus musculus (house mouse); mmu04620: Toll-lik…	GO:0000122: negative regulation of transcription by RNA polymerase II; GO:0000209: protein polyubiquitination; GO:0000209: protein polyubiquitination; GO:0001503: ossification; GO:0001701: in utero embryonic development; GO:0001843: neural tube closure; GO:0002376: immune system process; GO:0002637: regulation of immunoglobulin production; GO:0002726: positive regulation of T cell cytokine produc…
ENSMUSG00000063838	Cdc42ep5	216	270	280	4.5654	5.9985	5.7551	1.63374	3.19154e-07	1.64566e-05	up	7	4154259	4167859	-	protein_coding	CDC42 effector protein (Rho GTPase binding) 5 [Source:MGI Symbol%3BAcc:MGI:1929745]			GO:0005515: protein binding; GO:0005737: cytoplasm; GO:0005737: cytoplasm; GO:0005737: cytoplasm; GO:0005856: cytoskeleton; GO:0005886: plasma membrane; GO:0005886: plasma membrane; GO:0007254: JNK cascade; GO:0007266: Rho protein signal transduction; GO:0007266: Rho protein signal transduction; GO:0008360: regulation of cell shape; GO:0008360: regulation of cell shape; GO:0016020: membrane; GO:0…
ENSMUSG00000033594	Spata2l	1804	1218	2271	13.6761	9.7056	16.7421	1.29253	3.25694e-07	1.67164e-05	up	8	123956540	123962972	-	protein_coding	spermatogenesis associated 2-like [Source:MGI Symbol%3BAcc:MGI:1926029]	K17595: SPATA2; spermatogenesis-associated protein 2	mmu04217: Necroptosis - Mus musculus (house mouse)	GO:0003674: molecular_function; GO:0005737: cytoplasm; GO:0008150: biological_process
ENSMUSG00000016763	Scube1	86	59	69	0.2382	0.1718	0.1858	2.40314	3.2846e-07	1.68026e-05	up	15	83489200	83609222	-	protein_coding	signal peptide%2C CUB domain%2C EGF-like 1 [Source:MGI Symbol%3BAcc:MGI:1890616]	K24468: SCUBE1_3; signal peptide, CUB and EGF-like domain-containing protein 1/3		GO:0005509: calcium ion binding; GO:0005576: extracellular region; GO:0005615: extracellular space; GO:0005886: plasma membrane; GO:0007165: signal transduction; GO:0009897: external side of plasma membrane; GO:0009986: cell surface; GO:0009986: cell surface; GO:0016020: membrane; GO:0042802: identical protein binding; GO:0045880: positive regulation of smoothened signaling pathway
ENSMUSG00000112774	Gm36041	413	460	404	1.8398	2.154	1.7502	1.66277	3.3618e-07	1.71407e-05	up	10	122222797	122270938	+	lncRNA	predicted gene%2C 36041 [Source:MGI Symbol%3BAcc:MGI:5595200]
ENSMUSG00000026874	Hc	36595	41037	32795	159.016	187.434	138.578	-1.00507	3.38295e-07	1.71918e-05	down	2	34873343	34951450	-	protein_coding	hemolytic complement [Source:MGI Symbol%3BAcc:MGI:96031]	K03994: C5; complement component 5	mmu04080: Neuroactive ligand-receptor interaction - Mus musculus (house mouse); mmu04610: Complement and coagulation cascades - Mus musculus (house mouse); mmu04613: Neutrophil extracellular trap formation - Mus musculus (house mouse); mmu04810: Regulation of actin cytoskeleton - Mus musculus (house mouse); mmu04936: Alcoholic liver disease - Mus musculus (house mouse); mmu05020: Prion disease - …	GO:0001701: in utero embryonic development; GO:0001780: neutrophil homeostasis; GO:0001822: kidney development; GO:0002376: immune system process; GO:0004866: endopeptidase inhibitor activity; GO:0005576: extracellular region; GO:0005579: membrane attack complex; GO:0005615: extracellular space; GO:0005886: plasma membrane; GO:0006954: inflammatory response; GO:0006956: complement activation; GO:…
ENSMUSG00000068240	Gm11808	1639	1233	1460	88.5297	70.0044	76.6884	-0.89929	3.45535e-07	1.75022e-05	false	4	3973092	3973595	-	protein_coding	predicted gene 11808 [Source:MGI Symbol%3BAcc:MGI:3649356]			GO:0003674: molecular_function; GO:0005575: cellular_component; GO:0008150: biological_process
ENSMUSG00000021670	Hmgcr	4601	5903	3641	17.2171	23.2184	13.2494	1.27844	3.62153e-07	1.8284e-05	up	13	96785475	96807444	-	protein_coding	3-hydroxy-3-methylglutaryl-Coenzyme A reductase [Source:MGI Symbol%3BAcc:MGI:96159]	K00021: HMGCR; hydroxymethylglutaryl-CoA reductase (NADPH) [EC:1.1.1.34]	mmu00900: Terpenoid backbone biosynthesis - Mus musculus (house mouse); mmu01100: Metabolic pathways - Mus musculus (house mouse); mmu04152: AMPK signaling pathway - Mus musculus (house mouse); mmu04976: Bile secretion - Mus musculus (house mouse)	GO:0004420: hydroxymethylglutaryl-CoA reductase (NADPH) activity; GO:0004420: hydroxymethylglutaryl-CoA reductase (NADPH) activity; GO:0004420: hydroxymethylglutaryl-CoA reductase (NADPH) activity; GO:0005777: peroxisome; GO:0005778: peroxisomal membrane; GO:0005778: peroxisomal membrane; GO:0005783: endoplasmic reticulum; GO:0005789: endoplasmic reticulum membrane; GO:0006629: lipid metabolic pr…
ENSMUSG00000043671	Dpy19l3	173	236	136	0.4143	0.5941	0.3167	-1.31439	3.6864e-07	1.85509e-05	down	7	35384590	35453879	-	protein_coding	dpy-19-like 3 (C. elegans) [Source:MGI Symbol%3BAcc:MGI:2443952]	K24553: DPY19L; C-mannosyltransferase DPY19L [EC:2.4.1.-]		GO:0000030: mannosyltransferase activity; GO:0005637: nuclear inner membrane; GO:0016020: membrane; GO:0016021: integral component of membrane; GO:0016740: transferase activity; GO:0016757: glycosyltransferase activity; GO:0018406: protein C-linked glycosylation via 2'-alpha-mannosyl-L-tryptophan
ENSMUSG00000041438	Utp4	598	535	536	4.7173	4.4361	4.1118	-0.7771	4.16118e-07	2.08721e-05	false	8	107620268	107649720	+	protein_coding	UTP4 small subunit processome component [Source:MGI Symbol%3BAcc:MGI:1096573]	K14548: UTP4, CIRH1A; U3 small nucleolar RNA-associated protein 4	mmu03008: Ribosome biogenesis in eukaryotes - Mus musculus (house mouse)	GO:0000462: maturation of SSU-rRNA from tricistronic rRNA transcript (SSU-rRNA, 5.8S rRNA, LSU-rRNA); GO:0001650: fibrillar center; GO:0005634: nucleus; GO:0005694: chromosome; GO:0005730: nucleolus; GO:0006355: regulation of DNA-templated transcription; GO:0006364: rRNA processing; GO:0030490: maturation of SSU-rRNA; GO:0030686: 90S preribosome; GO:0032040: small-subunit processome; GO:0034455: …
ENSMUSG00000045680	Tcf21	235	191	205	2.7235	2.3267	2.3104	1.36888	4.20362e-07	2.10167e-05	up	10	22693180	22696073	-	protein_coding	transcription factor 21 [Source:MGI Symbol%3BAcc:MGI:1202715]			GO:0000122: negative regulation of transcription by RNA polymerase II; GO:0000122: negative regulation of transcription by RNA polymerase II; GO:0000977: RNA polymerase II transcription regulatory region sequence-specific DNA binding; GO:0000981: DNA-binding transcription factor activity, RNA polymerase II-specific; GO:0001227: DNA-binding transcription repressor activity, RNA polymerase II-speci…	bHLH
ENSMUSG00000026870	Cutal	1511	1791	1511	16.8515	20.9952	16.3872	0.99758	4.29012e-07	2.138e-05	false	2	34764408	34782144	+	protein_coding	cutA divalent cation tolerance homolog-like [Source:MGI Symbol%3BAcc:MGI:1925246]	K03926: cutA; periplasmic divalent cation tolerance protein		GO:0003674: molecular_function; GO:0005507: copper ion binding; GO:0005575: cellular_component; GO:0008150: biological_process
ENSMUSG00000020212	Mdm1	86	92	86	0.5688	0.6396	0.5531	1.94137	4.47011e-07	2.19932e-05	up	10	117977716	118004902	+	protein_coding	transformed mouse 3T3 cell double minute 1 [Source:MGI Symbol%3BAcc:MGI:96951]	K17886: MDM1; nuclear protein MDM1		GO:0005634: nucleus; GO:0005737: cytoplasm; GO:0005813: centrosome; GO:0005813: centrosome; GO:0005814: centriole; GO:0005814: centriole; GO:0005829: cytosol; GO:0005856: cytoskeleton; GO:0005874: microtubule; GO:0008017: microtubule binding; GO:0034451: centriolar satellite; GO:0046600: negative regulation of centriole replication; GO:0060041: retina development in camera-type eye; GO:0060041: r…
ENSMUSG00000026074	Map4k4	1048	1262	946	2.9784	3.7699	2.6144	1.04133	4.4436e-07	2.19932e-05	up	1	39940073	40065470	+	protein_coding	mitogen-activated protein kinase kinase kinase kinase 4 [Source:MGI Symbol%3BAcc:MGI:1349394]	K04407: MAP4K4, HGK; mitogen-activated protein kinase kinase kinase kinase 4 [EC:2.7.11.1]	mmu04010: MAPK signaling pathway - Mus musculus (house mouse)	GO:0000165: MAPK cascade; GO:0000166: nucleotide binding; GO:0004111: creatine kinase activity; GO:0004672: protein kinase activity; GO:0004674: protein serine/threonine kinase activity; GO:0004674: protein serine/threonine kinase activity; GO:0004674: protein serine/threonine kinase activity; GO:0005515: protein binding; GO:0005524: ATP binding; GO:0005524: ATP binding; GO:0005737: cytoplasm; GO…
ENSMUSG00000057465	Saa2	241	780	353	2.6056	8.864	3.7113	-8.27361	4.46996e-07	2.19932e-05	down	7	46401214	46403737	+	protein_coding	serum amyloid A 2 [Source:MGI Symbol%3BAcc:MGI:98222]	K17310: SAA; serum amyloid A protein		GO:0001664: G protein-coupled receptor binding; GO:0001819: positive regulation of cytokine production; GO:0005515: protein binding; GO:0005576: extracellular region; GO:0005881: cytoplasmic microtubule; GO:0006953: acute-phase response; GO:0007204: positive regulation of cytosolic calcium ion concentration; GO:0034364: high-density lipoprotein particle; GO:0035634: response to stilbenoid; GO:004…
ENSMUSG00000098470	C1rb	35	49	31	0.3923	0.5772	0.3379	-1.78112	4.45219e-07	2.19932e-05	down	6	124547253	124558130	+	protein_coding	complement component 1%2C r subcomponent B [Source:MGI Symbol%3BAcc:MGI:3779804]	K01330: C1R; complement component 1, r subcomponent [EC:3.4.21.41]	mmu04145: Phagosome - Mus musculus (house mouse); mmu04610: Complement and coagulation cascades - Mus musculus (house mouse); mmu05133: Pertussis - Mus musculus (house mouse); mmu05150: Staphylococcus aureus infection - Mus musculus (house mouse); mmu05171: Coronavirus disease - COVID-19 - Mus musculus (house mouse); mmu05322: Systemic lupus erythematosus - Mus musculus (house mouse)	GO:0002376: immune system process; GO:0004252: serine-type endopeptidase activity; GO:0004252: serine-type endopeptidase activity; GO:0005509: calcium ion binding; GO:0005576: extracellular region; GO:0005602: complement component C1 complex; GO:0005615: extracellular space; GO:0005615: extracellular space; GO:0006508: proteolysis; GO:0006958: complement activation, classical pathway; GO:0008233:…
ENSMUSG00000002797	Ggct	392	381	443	1.3779	1.4077	1.5142	1.09076	4.55933e-07	2.2361e-05	up	6	54959565	54969935	-	protein_coding	gamma-glutamyl cyclotransferase [Source:MGI Symbol%3BAcc:MGI:95700]	K00682: GGCT; gamma-glutamylcyclotransferase [EC:4.3.2.9]	mmu00480: Glutathione metabolism - Mus musculus (house mouse); mmu01100: Metabolic pathways - Mus musculus (house mouse)	GO:0001836: release of cytochrome c from mitochondria; GO:0003839: gamma-glutamylcyclotransferase activity; GO:0003839: gamma-glutamylcyclotransferase activity; GO:0005829: cytosol; GO:0016829: lyase activity; GO:0042803: protein homodimerization activity
ENSMUSG00000030541	Idh2	5309	4929	5014	55.8456	54.4988	51.2894	0.66084	4.73315e-07	2.314e-05	false	7	79744594	79765140	-	protein_coding	isocitrate dehydrogenase 2 (NADP+)%2C mitochondrial [Source:MGI Symbol%3BAcc:MGI:96414]	K00031: IDH1, IDH2, icd; isocitrate dehydrogenase [EC:1.1.1.42]	mmu00020: Citrate cycle (TCA cycle) - Mus musculus (house mouse); mmu00480: Glutathione metabolism - Mus musculus (house mouse); mmu01100: Metabolic pathways - Mus musculus (house mouse); mmu01200: Carbon metabolism - Mus musculus (house mouse); mmu01210: 2-Oxocarboxylic acid metabolism - Mus musculus (house mouse); mmu01230: Biosynthesis of amino acids - Mus musculus (house mouse); mmu04146: Per…	GO:0000287: magnesium ion binding; GO:0004450: isocitrate dehydrogenase (NADP+) activity; GO:0004450: isocitrate dehydrogenase (NADP+) activity; GO:0004450: isocitrate dehydrogenase (NADP+) activity; GO:0005739: mitochondrion; GO:0005739: mitochondrion; GO:0005739: mitochondrion; GO:0005743: mitochondrial inner membrane; GO:0005777: peroxisome; GO:0005829: cytosol; GO:0006097: glyoxylate cycle; G…
ENSMUSG00000046470	Sox18	322	293	330	5.411	5.1754	5.3927	1.35896	4.78339e-07	2.33118e-05	up	2	181311629	181313433	-	protein_coding	SRY (sex determining region Y)-box 18 [Source:MGI Symbol%3BAcc:MGI:103559]	K09270: SOX7S; transcription factor SOX7/8/10/18 (SOX group E/F)		GO:0000122: negative regulation of transcription by RNA polymerase II; GO:0000785: chromatin; GO:0000976: transcription cis-regulatory region binding; GO:0000976: transcription cis-regulatory region binding; GO:0000978: RNA polymerase II cis-regulatory region sequence-specific DNA binding; GO:0000978: RNA polymerase II cis-regulatory region sequence-specific DNA binding; GO:0000981: DNA-binding t…	HMG
ENSMUSG00000024378	Stard4	2864	3015	2247	13.9577	15.4447	10.649	0.95337	4.94197e-07	2.4009e-05	false	18	33332408	33346915	-	protein_coding	StAR-related lipid transfer (START) domain containing 4 [Source:MGI Symbol%3BAcc:MGI:2156764]			GO:0005737: cytoplasm; GO:0005739: mitochondrion; GO:0005783: endoplasmic reticulum; GO:0005783: endoplasmic reticulum; GO:0005829: cytosol; GO:0005829: cytosol; GO:0006869: lipid transport; GO:0008289: lipid binding; GO:0010873: positive regulation of cholesterol esterification; GO:0010879: cholesterol transport involved in cholesterol storage; GO:0010879: cholesterol transport involved in chole…
ENSMUSG00000074052	BC048644	207	280	249	1.0567	1.5024	1.236	1.93284	5.22666e-07	2.53124e-05	up	8	122634572	122646429	+	lncRNA	cDNA sequence BC048644 [Source:MGI Symbol%3BAcc:MGI:3039566]
ENSMUSG00000067818	Myl9	100	137	89	2.3428	3.3737	2.0276	1.97168	5.25316e-07	2.53613e-05	up	2	156617340	156623578	+	protein_coding	myosin%2C light polypeptide 9%2C regulatory [Source:MGI Symbol%3BAcc:MGI:2138915]	K12755: MYL9; myosin regulatory light chain 9	mmu04022: cGMP-PKG signaling pathway - Mus musculus (house mouse); mmu04024: cAMP signaling pathway - Mus musculus (house mouse); mmu04270: Vascular smooth muscle contraction - Mus musculus (house mouse); mmu04360: Axon guidance - Mus musculus (house mouse); mmu04510: Focal adhesion - Mus musculus (house mouse); mmu04530: Tight junction - Mus musculus (house mouse); mmu04670: Leukocyte transendot…	GO:0001725: stress fiber; GO:0001725: stress fiber; GO:0005509: calcium ion binding; GO:0005737: cytoplasm; GO:0005856: cytoskeleton; GO:0016459: myosin complex; GO:0016460: myosin II complex; GO:0016460: myosin II complex; GO:0030016: myofibril; GO:0030018: Z disc; GO:0030239: myofibril assembly; GO:0032036: myosin heavy chain binding; GO:0032036: myosin heavy chain binding; GO:0046872: metal io…
ENSMUSG00000121093	ENSMUSG00000121093	1284	1914	1510	10.8521	17.0037	12.4106	1.18215	5.46241e-07	2.62893e-05	up	17	21695173	21698393	+	lncRNA	novel transcript
ENSMUSG00000086432	B430119L08Rik	225	220	318	3.0718	3.1571	4.2219	-1.39216	5.54013e-07	2.65806e-05	down	12	103862156	103865043	+	lncRNA	RIKEN cDNA B430119L08 gene [Source:MGI Symbol%3BAcc:MGI:2441857]
ENSMUSG00000026768	Itga8	560	382	303	2.0691	1.4836	1.0887	1.75509	5.62904e-07	2.68405e-05	up	2	12111443	12306733	-	protein_coding	integrin alpha 8 [Source:MGI Symbol%3BAcc:MGI:109442]	K06584: ITGA8; integrin alpha 8	mmu04151: PI3K-Akt signaling pathway - Mus musculus (house mouse); mmu04510: Focal adhesion - Mus musculus (house mouse); mmu04512: ECM-receptor interaction - Mus musculus (house mouse); mmu04514: Cell adhesion molecules - Mus musculus (house mouse); mmu04810: Regulation of actin cytoskeleton - Mus musculus (house mouse); mmu05165: Human papillomavirus infection - Mus musculus (house mouse); mmu0…	GO:0001656: metanephros development; GO:0001656: metanephros development; GO:0001822: kidney development; GO:0005178: integrin binding; GO:0005783: endoplasmic reticulum; GO:0005886: plasma membrane; GO:0005886: plasma membrane; GO:0007155: cell adhesion; GO:0007160: cell-matrix adhesion; GO:0007160: cell-matrix adhesion; GO:0007179: transforming growth factor beta receptor signaling pathway; GO:…
ENSMUSG00000041559	Fmod	137	148	86	1.1281	1.281	0.6887	2.91516	5.62392e-07	2.68405e-05	up	1	133964992	133976015	+	protein_coding	fibromodulin [Source:MGI Symbol%3BAcc:MGI:1328364]	K08121: FMOD; fibromodulin	mmu04350: TGF-beta signaling pathway - Mus musculus (house mouse)	GO:0005576: extracellular region; GO:0005615: extracellular space; GO:0062023: collagen-containing extracellular matrix
ENSMUSG00000032786	Alas1	4538	7543	3916	20.0096	34.9599	16.7913	-1.89833	5.8494e-07	2.78053e-05	down	9	106110654	106125853	-	protein_coding	aminolevulinic acid synthase 1 [Source:MGI Symbol%3BAcc:MGI:87989]	K00643: E2.3.1.37, ALAS; 5-aminolevulinate synthase [EC:2.3.1.37]	mmu00260: Glycine, serine and threonine metabolism - Mus musculus (house mouse); mmu00860: Porphyrin metabolism - Mus musculus (house mouse); mmu01100: Metabolic pathways - Mus musculus (house mouse); mmu01240: Biosynthesis of cofactors - Mus musculus (house mouse)	GO:0003824: catalytic activity; GO:0003870: 5-aminolevulinate synthase activity; GO:0003870: 5-aminolevulinate synthase activity; GO:0005654: nucleoplasm; GO:0005739: mitochondrion; GO:0005739: mitochondrion; GO:0005739: mitochondrion; GO:0005759: mitochondrial matrix; GO:0005829: cytosol; GO:0006778: porphyrin-containing compound metabolic process; GO:0006783: heme biosynthetic process; GO:00090…
ENSMUSG00000121494	9030619P08Rik	353	143	312	5.9837	2.5479	5.143	2.18994	5.93379e-07	2.812e-05	up	15	75299450	75303678	-	lncRNA	lymphocyte antigen 6 complex pseudogene [Source:NCBI gene (formerly Entrezgene)%3BAcc:105892]
ENSMUSG00000014077	Chp1	11907	8211	8720	92.6401	67.1498	65.9751	-0.90889	6.24109e-07	2.93959e-05	false	2	119378178	119417508	+	protein_coding	calcineurin-like EF hand protein 1 [Source:MGI Symbol%3BAcc:MGI:1927185]	K17610: CHP, CHP1; calcineurin B homologous protein 1		GO:0000139: Golgi membrane; GO:0001578: microtubule bundle formation; GO:0001933: negative regulation of protein phosphorylation; GO:0004860: protein kinase inhibitor activity; GO:0005509: calcium ion binding; GO:0005634: nucleus; GO:0005737: cytoplasm; GO:0005783: endoplasmic reticulum; GO:0005829: cytosol; GO:0005856: cytoskeleton; GO:0005886: plasma membrane; GO:0005886: plasma membrane; GO:00…
ENSMUSG00000049804	Armcx4	257	228	166	0.875	0.8159	0.5496	1.56471	6.23323e-07	2.93959e-05	up	X	133587268	133597506	+	protein_coding	armadillo repeat containing%2C X-linked 4 [Source:MGI Symbol%3BAcc:MGI:2147887]	K26198: ARMCX4; armadillo repeat-containing X-linked protein 4		GO:0003674: molecular_function; GO:0005575: cellular_component; GO:0008150: biological_process
ENSMUSG00000002083	Bbc3	529	438	634	6.7802	5.9008	7.9021	1.12486	6.35746e-07	2.9853e-05	up	7	16042318	16052130	+	protein_coding	BCL2 binding component 3 [Source:MGI Symbol%3BAcc:MGI:2181667]	K10132: BBC3, PUMA; Bcl-2-binding component 3	mmu01524: Platinum drug resistance - Mus musculus (house mouse); mmu04115: p53 signaling pathway - Mus musculus (house mouse); mmu04210: Apoptosis - Mus musculus (house mouse); mmu04215: Apoptosis - multiple species - Mus musculus (house mouse); mmu04390: Hippo signaling pathway - Mus musculus (house mouse); mmu05016: Huntington disease - Mus musculus (house mouse); mmu05162: Measles - Mus muscul…	GO:0001836: release of cytochrome c from mitochondria; GO:0001836: release of cytochrome c from mitochondria; GO:0001836: release of cytochrome c from mitochondria; GO:0001844: protein insertion into mitochondrial membrane involved in apoptotic signaling pathway; GO:0005515: protein binding; GO:0005739: mitochondrion; GO:0005739: mitochondrion; GO:0005739: mitochondrion; GO:0005740: mitochondrial…
ENSMUSG00000051579	Tceal8	824	772	804	8.7522	8.6191	8.3045	1.31816	6.56444e-07	3.07315e-05	up	X	135069733	135073091	-	protein_coding	transcription elongation factor A (SII)-like 8 [Source:MGI Symbol%3BAcc:MGI:1913934]			GO:0005634: nucleus; GO:0050699: WW domain binding
ENSMUSG00000059796	Eif4a1	6760	6789	6629	42.4618	44.8239	40.4917	-0.72052	6.84184e-07	3.19334e-05	false	11	69557762	69563249	-	protein_coding	eukaryotic translation initiation factor 4A1 [Source:MGI Symbol%3BAcc:MGI:95303]	K03257: EIF4A; translation initiation factor 4A		GO:0000166: nucleotide binding; GO:0002183: cytoplasmic translational initiation; GO:0003676: nucleic acid binding; GO:0003723: RNA binding; GO:0003724: RNA helicase activity; GO:0003725: double-stranded RNA binding; GO:0003743: translation initiation factor activity; GO:0004386: helicase activity; GO:0005515: protein binding; GO:0005524: ATP binding; GO:0005737: cytoplasm; GO:0006412: translatio…
ENSMUSG00000018868	Pnpla5	17	79	32	0.2131	1.0408	0.39	6.85696	6.88166e-07	3.20225e-05	up	15	83996557	84007376	-	protein_coding	patatin-like phospholipase domain containing 5 [Source:MGI Symbol%3BAcc:MGI:1923022]	K16814: PNPLA5; patatin-like phospholipase domain-containing protein 5 [EC:3.1.1.-]		GO:0004806: triglyceride lipase activity; GO:0004806: triglyceride lipase activity; GO:0005737: cytoplasm; GO:0005811: lipid droplet; GO:0006629: lipid metabolic process; GO:0016020: membrane; GO:0016042: lipid catabolic process; GO:0016787: hydrolase activity; GO:0019433: triglyceride catabolic process; GO:0055088: lipid homeostasis
ENSMUSG00000058070	Eml1	188	180	151	0.6883	0.6927	0.5376	1.34768	6.95991e-07	3.22894e-05	up	12	108337216	108505876	+	protein_coding	echinoderm microtubule associated protein like 1 [Source:MGI Symbol%3BAcc:MGI:1915769]	K18595: EML1_2; echinoderm microtubule-associated protein-like 1/2		GO:0000226: microtubule cytoskeleton organization; GO:0000226: microtubule cytoskeleton organization; GO:0002244: hematopoietic progenitor cell differentiation; GO:0005515: protein binding; GO:0005737: cytoplasm; GO:0005829: cytosol; GO:0005856: cytoskeleton; GO:0005874: microtubule; GO:0007052: mitotic spindle organization; GO:0007405: neuroblast proliferation; GO:0007420: brain development; GO:…
ENSMUSG00000024598	Fbn2	37	35	25	0.0762	0.0758	0.0501	6.43968	7.44583e-07	3.44403e-05	up	18	58141695	58343559	-	protein_coding	fibrillin 2 [Source:MGI Symbol%3BAcc:MGI:95490]	K23342: FBN2_3; fibrillin 2/3		GO:0001527: microfibril; GO:0001527: microfibril; GO:0001527: microfibril; GO:0001890: placenta development; GO:0005179: hormone activity; GO:0005179: hormone activity; GO:0005201: extracellular matrix structural constituent; GO:0005201: extracellular matrix structural constituent; GO:0005509: calcium ion binding; GO:0005515: protein binding; GO:0005576: extracellular region; GO:0005576: extracel…
ENSMUSG00000032602	Slc25a20	3884	3201	3955	21.8281	18.9092	21.6147	-0.83874	7.87088e-07	3.62977e-05	false	9	108539287	108561840	+	protein_coding	solute carrier family 25 (mitochondrial carnitine/acylcarnitine translocase)%2C member 20 [Source:MGI Symbol%3BAcc:MGI:1928738]	K15109: SLC25A20_29, CACT, CACL, CRC1; solute carrier family 25 (mitochondrial carnitine/acylcarnitine transporter), member 20/29	mmu04714: Thermogenesis - Mus musculus (house mouse)	GO:0001701: in utero embryonic development; GO:0005739: mitochondrion; GO:0005739: mitochondrion; GO:0005740: mitochondrial envelope; GO:0005743: mitochondrial inner membrane; GO:0005829: cytosol; GO:0006810: transport; GO:0006839: mitochondrial transport; GO:0006869: lipid transport; GO:0015227: acyl carnitine transmembrane transporter activity; GO:0015227: acyl carnitine transmembrane transport…
ENSMUSG00000072235	Tuba1a	228	485	325	3.4425	7.6973	4.7719	1.87478	8.10985e-07	3.72884e-05	up	15	98847718	98851584	-	protein_coding	tubulin%2C alpha 1A [Source:MGI Symbol%3BAcc:MGI:98869]	K07374: TUBA; tubulin alpha	mmu04145: Phagosome - Mus musculus (house mouse); mmu04210: Apoptosis - Mus musculus (house mouse); mmu04530: Tight junction - Mus musculus (house mouse); mmu04540: Gap junction - Mus musculus (house mouse); mmu05010: Alzheimer disease - Mus musculus (house mouse); mmu05012: Parkinson disease - Mus musculus (house mouse); mmu05014: Amyotrophic lateral sclerosis - Mus musculus (house mouse); mmu05…	GO:0000166: nucleotide binding; GO:0000226: microtubule cytoskeleton organization; GO:0000278: mitotic cell cycle; GO:0003924: GTPase activity; GO:0005200: structural constituent of cytoskeleton; GO:0005515: protein binding; GO:0005525: GTP binding; GO:0005737: cytoplasm; GO:0005856: cytoskeleton; GO:0005874: microtubule; GO:0005874: microtubule; GO:0005881: cytoplasmic microtubule; GO:0007017: m…
ENSMUSG00000031924	Cyb5b	20913	21417	19019	130.16	140.111	115.111	0.89085	8.27126e-07	3.79177e-05	false	8	107877272	107914103	+	protein_coding	cytochrome b5 type B [Source:MGI Symbol%3BAcc:MGI:1913677]	K23490: CYB5; cytochrome b5		GO:0005739: mitochondrion; GO:0005741: mitochondrial outer membrane; GO:0005741: mitochondrial outer membrane; GO:0005743: mitochondrial inner membrane; GO:0006809: nitric oxide biosynthetic process; GO:0008047: enzyme activator activity; GO:0016020: membrane; GO:0016021: integral component of membrane; GO:0020037: heme binding; GO:0020037: heme binding; GO:0043231: intracellular membrane-bounded…
ENSMUSG00000027204	Fbn1	336	276	181	0.7542	0.6512	0.3951	1.53947	8.36739e-07	3.81321e-05	up	2	125142514	125349913	-	protein_coding	fibrillin 1 [Source:MGI Symbol%3BAcc:MGI:95489]	K06825: FBN1; fibrillin 1	mmu04350: TGF-beta signaling pathway - Mus musculus (house mouse)	GO:0001501: skeletal system development; GO:0001527: microfibril; GO:0001527: microfibril; GO:0001527: microfibril; GO:0001656: metanephros development; GO:0001822: kidney development; GO:0005178: integrin binding; GO:0005179: hormone activity; GO:0005179: hormone activity; GO:0005201: extracellular matrix structural constituent; GO:0005201: extracellular matrix structural constituent; GO:0005201…
ENSMUSG00000105987	AI506816	693	1204	641	3.2948	6.0168	2.9636	1.65984	8.36508e-07	3.81321e-05	up	5	23903294	23917684	-	lncRNA	expressed sequence AI506816 [Source:MGI Symbol%3BAcc:MGI:2140929]
ENSMUSG00000029254	Stap1	55	96	53	0.2409	0.442	0.2258	2.75568	8.47512e-07	3.85095e-05	up	5	86219605	86253984	+	protein_coding	signal transducing adaptor family member 1 [Source:MGI Symbol%3BAcc:MGI:1926193]	K24025: STAP1; signal-transducing adaptor protein 1		GO:0001784: phosphotyrosine residue binding; GO:0005068: transmembrane receptor protein tyrosine kinase adaptor activity; GO:0005157: macrophage colony-stimulating factor receptor binding; GO:0005515: protein binding; GO:0005634: nucleus; GO:0005654: nucleoplasm; GO:0005737: cytoplasm; GO:0005739: mitochondrion; GO:0007169: transmembrane receptor protein tyrosine kinase signaling pathway; GO:0007…
ENSMUSG00000020300	Cpeb4	1045	880	708	4.4667	3.9537	2.9429	-1.03215	8.63487e-07	3.91203e-05	down	11	31822211	31885634	+	protein_coding	cytoplasmic polyadenylation element binding protein 4 [Source:MGI Symbol%3BAcc:MGI:1914829]	K02602: CPEB, ORB; cytoplasmic polyadenylation element-binding protein	mmu04114: Oocyte meiosis - Mus musculus (house mouse); mmu04914: Progesterone-mediated oocyte maturation - Mus musculus (house mouse)	GO:0000900: mRNA regulatory element binding translation repressor activity; GO:0002931: response to ischemia; GO:0003676: nucleic acid binding; GO:0003723: RNA binding; GO:0003730: mRNA 3'-UTR binding; GO:0005634: nucleus; GO:0005634: nucleus; GO:0005634: nucleus; GO:0005737: cytoplasm; GO:0005737: cytoplasm; GO:0005737: cytoplasm; GO:0005783: endoplasmic reticulum; GO:0008135: translation factor…
ENSMUSG00000016918	Sulf1	68	57	38	0.1639	0.1444	0.0891	3.16419	8.8291e-07	3.98833e-05	up	1	12762501	12931416	+	protein_coding	sulfatase 1 [Source:MGI Symbol%3BAcc:MGI:2138563]	K14607: SULF; extracellular sulfatase Sulf [EC:3.1.6.-]		GO:0001822: kidney development; GO:0001937: negative regulation of endothelial cell proliferation; GO:0002063: chondrocyte development; GO:0003094: glomerular filtration; GO:0003824: catalytic activity; GO:0004065: arylsulfatase activity; GO:0005509: calcium ion binding; GO:0005539: glycosaminoglycan binding; GO:0005615: extracellular space; GO:0005783: endoplasmic reticulum; GO:0005783: endoplas…
ENSMUSG00000027514	Zbp1	525	324	563	4.0499	2.6272	4.2234	-1.8848	9.11473e-07	4.10535e-05	down	2	173048405	173060716	-	protein_coding	Z-DNA binding protein 1 [Source:MGI Symbol%3BAcc:MGI:1927449]	K12965: ZBP1, DAI; Z-DNA binding protein 1	mmu04217: Necroptosis - Mus musculus (house mouse); mmu04623: Cytosolic DNA-sensing pathway - Mus musculus (house mouse)	GO:0002218: activation of innate immune response; GO:0002218: activation of innate immune response; GO:0002376: immune system process; GO:0003677: DNA binding; GO:0003677: DNA binding; GO:0003677: DNA binding; GO:0003692: left-handed Z-DNA binding; GO:0003723: RNA binding; GO:0003725: double-stranded RNA binding; GO:0005515: protein binding; GO:0005634: nucleus; GO:0005634: nucleus; GO:0005634: n…
ENSMUSG00000004891	Nes	100	150	123	0.4243	0.669	0.5075	2.12419	9.1595e-07	4.11352e-05	up	3	87878385	87887758	+	protein_coding	nestin [Source:MGI Symbol%3BAcc:MGI:101784]	K07609: NES; nestin		GO:0000086: G2/M transition of mitotic cell cycle; GO:0005515: protein binding; GO:0005737: cytoplasm; GO:0005737: cytoplasm; GO:0005882: intermediate filament; GO:0005882: intermediate filament; GO:0005882: intermediate filament; GO:0007275: multicellular organism development; GO:0007399: nervous system development; GO:0019215: intermediate filament binding; GO:0030844: positive regulation of in…
ENSMUSG00000035967	Ints6l	194	216	221	0.7363	0.8617	0.8156	1.20429	9.47616e-07	4.2434e-05	up	X	55500217	55553203	+	protein_coding	integrator complex subunit 6 like [Source:MGI Symbol%3BAcc:MGI:2442593]	K13180: DDX26B; ATP-dependent RNA helicase DDX26B [EC:3.6.4.-]		GO:0003674: molecular_function; GO:0032039: integrator complex; GO:0034472: snRNA 3'-end processing
ENSMUSG00000024981	Acsl5	19967	23277	18011	111.753	136.939	98.0283	1.28319	9.53796e-07	4.25873e-05	up	19	55240370	55286152	+	protein_coding	acyl-CoA synthetase long-chain family member 5 [Source:MGI Symbol%3BAcc:MGI:1919129]	K01897: ACSL, fadD; long-chain acyl-CoA synthetase [EC:6.2.1.3]	mmu00061: Fatty acid biosynthesis - Mus musculus (house mouse); mmu00071: Fatty acid degradation - Mus musculus (house mouse); mmu01100: Metabolic pathways - Mus musculus (house mouse); mmu01212: Fatty acid metabolism - Mus musculus (house mouse); mmu03320: PPAR signaling pathway - Mus musculus (house mouse); mmu04146: Peroxisome - Mus musculus (house mouse); mmu04216: Ferroptosis - Mus musculus …	GO:0000166: nucleotide binding; GO:0001676: long-chain fatty acid metabolic process; GO:0001676: long-chain fatty acid metabolic process; GO:0001676: long-chain fatty acid metabolic process; GO:0004467: long-chain fatty acid-CoA ligase activity; GO:0004467: long-chain fatty acid-CoA ligase activity; GO:0004467: long-chain fatty acid-CoA ligase activity; GO:0005524: ATP binding; GO:0005654: nucleo…
ENSMUSG00000060477	Irak2	1111	986	1127	6.8552	6.3949	6.7623	-0.73641	9.76855e-07	4.34912e-05	false	6	113615428	113671987	+	protein_coding	interleukin-1 receptor-associated kinase 2 [Source:MGI Symbol%3BAcc:MGI:2429603]	K04731: IRAK2; interleukin-1 receptor-associated kinase 2 [EC:2.7.11.1]	mmu04722: Neurotrophin signaling pathway - Mus musculus (house mouse); mmu05152: Tuberculosis - Mus musculus (house mouse)	GO:0000166: nucleotide binding; GO:0001959: regulation of cytokine-mediated signaling pathway; GO:0002755: MyD88-dependent toll-like receptor signaling pathway; GO:0004672: protein kinase activity; GO:0004672: protein kinase activity; GO:0004674: protein serine/threonine kinase activity; GO:0005515: protein binding; GO:0005524: ATP binding; GO:0005634: nucleus; GO:0005737: cytoplasm; GO:0005886: …
ENSMUSG00000055546	Timd4	202	246	190	2.5307	3.2394	2.3147	-1.49669	9.80009e-07	4.35062e-05	down	11	46701627	46735159	+	protein_coding	T cell immunoglobulin and mucin domain containing 4 [Source:MGI Symbol%3BAcc:MGI:2445125]			GO:0001786: phosphatidylserine binding; GO:0001786: phosphatidylserine binding; GO:0005515: protein binding; GO:0016020: membrane; GO:0016021: integral component of membrane; GO:0043277: apoptotic cell clearance; GO:0043277: apoptotic cell clearance; GO:0060097: cytoskeletal rearrangement involved in phagocytosis, engulfment
ENSMUSG00000025002	Cyp2c55	662	1017	533	9.0335	14.5872	7.0728	3.96314	9.89293e-07	4.37925e-05	up	19	38995463	39031137	+	protein_coding	cytochrome P450%2C family 2%2C subfamily c%2C polypeptide 55 [Source:MGI Symbol%3BAcc:MGI:1919332]	K07413: CYP2C; cytochrome P450 family 2 subfamily C [EC:1.14.14.1]	mmu00140: Steroid hormone biosynthesis - Mus musculus (house mouse); mmu00590: Arachidonic acid metabolism - Mus musculus (house mouse); mmu00591: Linoleic acid metabolism - Mus musculus (house mouse); mmu00830: Retinol metabolism - Mus musculus (house mouse); mmu01100: Metabolic pathways - Mus musculus (house mouse); mmu04726: Serotonergic synapse - Mus musculus (house mouse); mmu04750: Inflamma…	GO:0004497: monooxygenase activity; GO:0005506: iron ion binding; GO:0005737: cytoplasm; GO:0005783: endoplasmic reticulum; GO:0005886: plasma membrane; GO:0006082: organic acid metabolic process; GO:0006805: xenobiotic metabolic process; GO:0008392: arachidonic acid epoxygenase activity; GO:0008392: arachidonic acid epoxygenase activity; GO:0008395: steroid hydroxylase activity; GO:0008401: reti…
ENSMUSG00000062480	Acat3	6105	6127	6666	68.4789	72.2388	72.7114	0.67198	9.97719e-07	4.40393e-05	false	17	13142700	13159487	-	protein_coding	acetyl-Coenzyme A acetyltransferase 3 [Source:MGI Symbol%3BAcc:MGI:109182]	K00626: ACAT, atoB; acetyl-CoA C-acetyltransferase [EC:2.3.1.9]	mmu00071: Fatty acid degradation - Mus musculus (house mouse); mmu00280: Valine, leucine and isoleucine degradation - Mus musculus (house mouse); mmu00310: Lysine degradation - Mus musculus (house mouse); mmu00380: Tryptophan metabolism - Mus musculus (house mouse); mmu00620: Pyruvate metabolism - Mus musculus (house mouse); mmu00630: Glyoxylate and dicarboxylate metabolism - Mus musculus (house …	GO:0003985: acetyl-CoA C-acetyltransferase activity; GO:0003985: acetyl-CoA C-acetyltransferase activity; GO:0005737: cytoplasm; GO:0005739: mitochondrion; GO:0005739: mitochondrion; GO:0005829: cytosol; GO:0006635: fatty acid beta-oxidation
ENSMUSG00000095061	E030018B13Rik	4	3	0	0.1073	0.0846	0	-6.44113	1.04867e-06	4.61566e-05	down	7	63566605	63570287	+	protein_coding	RIKEN cDNA E030018B13 gene [Source:MGI Symbol%3BAcc:MGI:2686543]			GO:0003674: molecular_function; GO:0005575: cellular_component; GO:0008150: biological_process
ENSMUSG00000020898	Ctc1	476	524	530	1.9065	2.206	2.0643	0.91819	1.07788e-06	4.73075e-05	false	11	68906737	68927299	+	protein_coding	CTS telomere maintenance complex component 1 [Source:MGI Symbol%3BAcc:MGI:1916214]	K23311: CTC1; CST complex subunit CTC1		GO:0000723: telomere maintenance; GO:0000781: chromosome, telomeric region; GO:0000781: chromosome, telomeric region; GO:0003677: DNA binding; GO:0003697: single-stranded DNA binding; GO:0003697: single-stranded DNA binding; GO:0005515: protein binding; GO:0005634: nucleus; GO:0005634: nucleus; GO:0005654: nucleoplasm; GO:0005694: chromosome; GO:0005829: cytosol; GO:0006974: cellular response to …
ENSMUSG00000053044	Cd8b1	69	35	100	1.2666	0.6753	1.7851	3.0696	1.10427e-06	4.83281e-05	up	6	71299772	71314478	+	protein_coding	CD8 antigen%2C beta chain 1 [Source:MGI Symbol%3BAcc:MGI:88347]	K06459: CD8B; T-cell surface glycoprotein CD8 beta chain	mmu04514: Cell adhesion molecules - Mus musculus (house mouse); mmu04612: Antigen processing and presentation - Mus musculus (house mouse); mmu04640: Hematopoietic cell lineage - Mus musculus (house mouse); mmu04660: T cell receptor signaling pathway - Mus musculus (house mouse); mmu05135: Yersinia infection - Mus musculus (house mouse); mmu05340: Primary immunodeficiency - Mus musculus (house mo…	GO:0002250: adaptive immune response; GO:0002376: immune system process; GO:0005515: protein binding; GO:0005886: plasma membrane; GO:0005886: plasma membrane; GO:0009897: external side of plasma membrane; GO:0009986: cell surface; GO:0009986: cell surface; GO:0015026: coreceptor activity; GO:0016020: membrane; GO:0016021: integral component of membrane; GO:0042288: MHC class I protein binding; G…
ENSMUSG00000040035	Disp2	55	31	34	0.1567	0.0928	0.0942	-1.94637	1.14984e-06	5.01804e-05	down	2	118610200	118641774	+	protein_coding	dispatched RND tramsporter family member 2 [Source:MGI Symbol%3BAcc:MGI:2388733]	K24681: DISP2; protein dispatched 2		GO:0003674: molecular_function; GO:0005575: cellular_component; GO:0005886: plasma membrane; GO:0007224: smoothened signaling pathway; GO:0008150: biological_process; GO:0016020: membrane; GO:0016020: membrane; GO:0016021: integral component of membrane; GO:0022857: transmembrane transporter activity; GO:0055085: transmembrane transport
ENSMUSG00000030862	Cpxm2	90	53	59	0.5301	0.3281	0.3379	3.27175	1.16281e-06	5.05814e-05	up	7	131634416	131756468	-	protein_coding	carboxypeptidase X 2 (M14 family) [Source:MGI Symbol%3BAcc:MGI:1926006]	K08639: CPXM2; carboxypeptidase X2		GO:0004181: metallocarboxypeptidase activity; GO:0005576: extracellular region; GO:0006518: peptide metabolic process; GO:0008270: zinc ion binding; GO:0016485: protein processing
ENSMUSG00000031167	Rbm3	577	530	646	3.3435	3.2282	3.6402	-0.92313	1.16558e-06	5.05814e-05	false	X	8005214	8012119	-	protein_coding	RNA binding motif (RNP1%2C RRM) protein 3 [Source:MGI Symbol%3BAcc:MGI:1099460]	K13186: RBM3; RNA-binding protein 3		GO:0003676: nucleic acid binding; GO:0003723: RNA binding; GO:0003723: RNA binding; GO:0005634: nucleus; GO:0005654: nucleoplasm; GO:0005681: spliceosomal complex; GO:0005737: cytoplasm; GO:0006412: translation; GO:0006417: regulation of translation; GO:0006417: regulation of translation; GO:0009409: response to cold; GO:0030425: dendrite; GO:0035196: miRNA processing; GO:0042995: cell projection…
ENSMUSG00000090733	Rps27	574	436	557	14.9819	11.9618	14.1377	-0.8855	1.20093e-06	5.19699e-05	false	3	90119829	90120958	-	protein_coding	ribosomal protein S27 [Source:MGI Symbol%3BAcc:MGI:1888676]	K02978: RP-S27e, RPS27; small subunit ribosomal protein S27e	mmu03010: Ribosome - Mus musculus (house mouse); mmu05171: Coronavirus disease - COVID-19 - Mus musculus (house mouse)	GO:0000028: ribosomal small subunit assembly; GO:0003723: RNA binding; GO:0003735: structural constituent of ribosome; GO:0003735: structural constituent of ribosome; GO:0005515: protein binding; GO:0005634: nucleus; GO:0005829: cytosol; GO:0006364: rRNA processing; GO:0014069: postsynaptic density; GO:0022626: cytosolic ribosome; GO:0022627: cytosolic small ribosomal subunit; GO:0022627: cytosol…
ENSMUSG00000063730	Hsd3b2	2024	2271	1946	14.912	17.5871	13.9423	1.43398	1.20502e-06	5.20008e-05	up	3	98616571	98631859	-	protein_coding	hydroxy-delta-5-steroid dehydrogenase%2C 3 beta- and steroid delta-isomerase 2 [Source:MGI Symbol%3BAcc:MGI:96234]	K00070: HSD3B; 3beta-hydroxy-Delta5-steroid dehydrogenase / steroid Delta-isomerase [EC:1.1.1.145 5.3.3.1]	mmu00140: Steroid hormone biosynthesis - Mus musculus (house mouse); mmu01100: Metabolic pathways - Mus musculus (house mouse); mmu04913: Ovarian steroidogenesis - Mus musculus (house mouse); mmu04925: Aldosterone synthesis and secretion - Mus musculus (house mouse); mmu04927: Cortisol synthesis and secretion - Mus musculus (house mouse); mmu04934: Cushing syndrome - Mus musculus (house mouse)	GO:0003824: catalytic activity; GO:0003854: 3-beta-hydroxy-delta5-steroid dehydrogenase activity; GO:0004769: steroid delta-isomerase activity; GO:0005730: nucleolus; GO:0005737: cytoplasm; GO:0005739: mitochondrion; GO:0005743: mitochondrial inner membrane; GO:0005758: mitochondrial intermembrane space; GO:0005783: endoplasmic reticulum; GO:0006629: lipid metabolic process; GO:0006694: steroid b…
ENSMUSG00000045934	Mtmr11	299	397	304	2.1534	3.0053	2.1291	2.1997	1.23537e-06	5.31623e-05	up	3	96069321	96079034	+	protein_coding	myotubularin related protein 11 [Source:MGI Symbol%3BAcc:MGI:2652817]	K18085: MTMR10_11_12; myotubularin-related protein 10/11/12		GO:0004438: phosphatidylinositol-3-phosphatase activity; GO:0005737: cytoplasm; GO:0005737: cytoplasm; GO:0016020: membrane; GO:0046856: phosphatidylinositol dephosphorylation
ENSMUSG00000053581	Zfand2a	378	391	296	3.0204	3.284	2.3	-1.14585	1.25216e-06	5.3735e-05	down	5	139456966	139470304	-	protein_coding	zinc finger%2C AN1-type domain 2A [Source:MGI Symbol%3BAcc:MGI:2140729]	K24685: ZFAND2; AN1-type zinc finger protein 2		GO:0000502: proteasome complex; GO:0005515: protein binding; GO:0005634: nucleus; GO:0005737: cytoplasm; GO:0005783: endoplasmic reticulum; GO:0008270: zinc ion binding; GO:0032436: positive regulation of proteasomal ubiquitin-dependent protein catabolic process; GO:0043161: proteasome-mediated ubiquitin-dependent protein catabolic process; GO:0045047: protein targeting to ER; GO:0046872: metal i…
ENSMUSG00000048218	Amigo2	176	181	191	1.5148	1.6375	1.5986	-1.02962	1.26301e-06	5.40507e-05	down	15	97142006	97145168	-	protein_coding	adhesion molecule with Ig like domain 2 [Source:MGI Symbol%3BAcc:MGI:2145995]	K22529: AMIGO; amphoterin-induced protein		GO:0003674: molecular_function; GO:0005634: nucleus; GO:0005886: plasma membrane; GO:0007155: cell adhesion; GO:0007156: homophilic cell adhesion via plasma membrane adhesion molecules; GO:0007156: homophilic cell adhesion via plasma membrane adhesion molecules; GO:0007157: heterophilic cell-cell adhesion via plasma membrane cell adhesion molecules; GO:0007157: heterophilic cell-cell adhesion via…
ENSMUSG00000029752	Asns	94	179	106	0.9356	1.8728	1.026	-2.19485	1.2967e-06	5.5339e-05	down	6	7675169	7693254	-	protein_coding	asparagine synthetase [Source:MGI Symbol%3BAcc:MGI:1350929]	K01953: asnB, ASNS; asparagine synthase (glutamine-hydrolysing) [EC:6.3.5.4]	mmu00250: Alanine, aspartate and glutamate metabolism - Mus musculus (house mouse); mmu01100: Metabolic pathways - Mus musculus (house mouse); mmu01230: Biosynthesis of amino acids - Mus musculus (house mouse)	GO:0000166: nucleotide binding; GO:0004066: asparagine synthase (glutamine-hydrolyzing) activity; GO:0004066: asparagine synthase (glutamine-hydrolyzing) activity; GO:0005524: ATP binding; GO:0005829: cytosol; GO:0005829: cytosol; GO:0005829: cytosol; GO:0006529: asparagine biosynthetic process; GO:0006529: asparagine biosynthetic process; GO:0006541: glutamine metabolic process; GO:0008652: cell…
ENSMUSG00000028238	Atp6v0d2	133	161	122	1.3331	1.6962	1.1892	1.69346	1.35589e-06	5.77055e-05	up	4	19876841	19922605	-	protein_coding	ATPase%2C H+ transporting%2C lysosomal V0 subunit D2 [Source:MGI Symbol%3BAcc:MGI:1924415]	K02146: ATPeV0D, ATP6D; V-type H+-transporting ATPase subunit d	mmu00190: Oxidative phosphorylation - Mus musculus (house mouse); mmu01100: Metabolic pathways - Mus musculus (house mouse); mmu04142: Lysosome - Mus musculus (house mouse); mmu04145: Phagosome - Mus musculus (house mouse); mmu04721: Synaptic vesicle cycle - Mus musculus (house mouse); mmu04966: Collecting duct acid secretion - Mus musculus (house mouse); mmu05152: Tuberculosis - Mus musculus (ho…	GO:0005768: endosome; GO:0005769: early endosome; GO:0005769: early endosome; GO:0006811: ion transport; GO:0007034: vacuolar transport; GO:0007035: vacuolar acidification; GO:0015078: proton transmembrane transporter activity; GO:0016020: membrane; GO:0016324: apical plasma membrane; GO:0016471: vacuolar proton-transporting V-type ATPase complex; GO:0016471: vacuolar proton-transporting V-type A…
ENSMUSG00000023886	Smoc2	566	565	515	2.2167	2.3259	1.9614	1.52548	1.36018e-06	5.7729e-05	up	17	14499768	14625052	+	protein_coding	SPARC related modular calcium binding 2 [Source:MGI Symbol%3BAcc:MGI:1929881]	K24354: SMOC; SPARC-related modular calcium-binding protein		GO:0005509: calcium ion binding; GO:0005539: glycosaminoglycan binding; GO:0005576: extracellular region; GO:0005604: basement membrane; GO:0005604: basement membrane; GO:0005614: interstitial matrix; GO:0005615: extracellular space; GO:0005615: extracellular space; GO:0008201: heparin binding; GO:0008201: heparin binding; GO:0010595: positive regulation of endothelial cell migration; GO:0010811:…
ENSMUSG00000028961	Pgd	2229	3207	2400	9.4122	14.2342	9.8551	1.14896	1.37506e-06	5.80418e-05	up	4	149234448	149251228	-	protein_coding	phosphogluconate dehydrogenase [Source:MGI Symbol%3BAcc:MGI:97553]	K00033: PGD, gnd, gntZ; 6-phosphogluconate dehydrogenase [EC:1.1.1.44 1.1.1.343]	mmu00030: Pentose phosphate pathway - Mus musculus (house mouse); mmu00480: Glutathione metabolism - Mus musculus (house mouse); mmu01100: Metabolic pathways - Mus musculus (house mouse); mmu01200: Carbon metabolism - Mus musculus (house mouse)	GO:0004616: phosphogluconate dehydrogenase (decarboxylating) activity; GO:0004616: phosphogluconate dehydrogenase (decarboxylating) activity; GO:0004616: phosphogluconate dehydrogenase (decarboxylating) activity; GO:0005737: cytoplasm; GO:0005829: cytosol; GO:0005829: cytosol; GO:0005975: carbohydrate metabolic process; GO:0006098: pentose-phosphate shunt; GO:0006739: NADP metabolic process; GO:0…
ENSMUSG00000042608	Stk40	1361	1233	1206	8.9995	8.5699	7.7549	-0.80317	1.37139e-06	5.80418e-05	false	4	125997750	126034822	+	protein_coding	serine/threonine kinase 40 [Source:MGI Symbol%3BAcc:MGI:1921428]	K16312: STK40, SHIK; serine/threonine-protein kinase 40 [EC:2.7.11.1]		GO:0000166: nucleotide binding; GO:0003016: respiratory system process; GO:0004672: protein kinase activity; GO:0004674: protein serine/threonine kinase activity; GO:0005515: protein binding; GO:0005524: ATP binding; GO:0005634: nucleus; GO:0005654: nucleoplasm; GO:0005737: cytoplasm; GO:0005829: cytosol; GO:0005977: glycogen metabolic process; GO:0006468: protein phosphorylation; GO:0010468: reg…
ENSMUSG00000019960	Dusp6	1749	1381	1417	15.2023	12.6172	11.9772	-0.85185	1.38022e-06	5.81007e-05	false	10	99099093	99103351	+	protein_coding	dual specificity phosphatase 6 [Source:MGI Symbol%3BAcc:MGI:1914853]	K21946: DUSP6; dual specificity phosphatase 6 [EC:3.1.3.16 3.1.3.48]	mmu04010: MAPK signaling pathway - Mus musculus (house mouse); mmu05202: Transcriptional misregulation in cancer - Mus musculus (house mouse); mmu05221: Acute myeloid leukemia - Mus musculus (house mouse)	GO:0001933: negative regulation of protein phosphorylation; GO:0004721: phosphoprotein phosphatase activity; GO:0004721: phosphoprotein phosphatase activity; GO:0004722: protein serine/threonine phosphatase activity; GO:0004725: protein tyrosine phosphatase activity; GO:0005515: protein binding; GO:0005654: nucleoplasm; GO:0005737: cytoplasm; GO:0005737: cytoplasm; GO:0005829: cytosol; GO:0005829…
ENSMUSG00000018474	Chd3	3491	3414	3453	11.2562	11.5707	10.827	-0.64271	1.45285e-06	6.09922e-05	false	11	69234099	69260232	-	protein_coding	chromodomain helicase DNA binding protein 3 [Source:MGI Symbol%3BAcc:MGI:1344395]	K11642: CHD3, MI2A; chromodomain-helicase-DNA-binding protein 3 [EC:5.6.2.-]		GO:0000122: negative regulation of transcription by RNA polymerase II; GO:0000122: negative regulation of transcription by RNA polymerase II; GO:0000785: chromatin; GO:0000976: transcription cis-regulatory region binding; GO:0003677: DNA binding; GO:0003678: DNA helicase activity; GO:0003682: chromatin binding; GO:0005515: protein binding; GO:0005634: nucleus; GO:0005634: nucleus; GO:0005654: nuc…
ENSMUSG00000039701	Usp53	130	117	102	0.2815	0.2663	0.2148	-1.2866	1.4935e-06	6.25288e-05	down	3	122725142	122778159	-	protein_coding	ubiquitin specific peptidase 53 [Source:MGI Symbol%3BAcc:MGI:2139607]			GO:0001508: action potential; GO:0004843: cysteine-type deubiquitinase activity; GO:0005515: protein binding; GO:0005911: cell-cell junction; GO:0005911: cell-cell junction; GO:0005923: bicellular tight junction; GO:0007605: sensory perception of sound; GO:0007605: sensory perception of sound; GO:0010996: response to auditory stimulus; GO:0010996: response to auditory stimulus; GO:0030054: cell j…
ENSMUSG00000032198	Dock6	1241	1612	1360	3.847	5.2525	4.0997	0.97926	1.50365e-06	6.27835e-05	false	9	21711156	21763931	-	protein_coding	dedicator of cytokinesis 6 [Source:MGI Symbol%3BAcc:MGI:1914789]	K21852: DOCK6_7_8; dedicator of cytokinesis protein 6/7/8		GO:0005085: guanyl-nucleotide exchange factor activity; GO:0005737: cytoplasm; GO:0005829: cytosol; GO:0005829: cytosol; GO:0007264: small GTPase mediated signal transduction; GO:0043547: positive regulation of GTPase activity
ENSMUSG00000002107	Celf2	228	158	170	0.2398	0.1747	0.1739	-1.22166	1.5272e-06	6.3595e-05	down	2	6544505	7514374	-	protein_coding	CUGBP%2C Elav-like family member 2 [Source:MGI Symbol%3BAcc:MGI:1338822]	K13207: CUGBP, BRUNOL, CELF; CUG-BP- and ETR3-like factor		GO:0000381: regulation of alternative mRNA splicing, via spliceosome; GO:0003676: nucleic acid binding; GO:0003723: RNA binding; GO:0003723: RNA binding; GO:0003729: mRNA binding; GO:0003730: mRNA 3'-UTR binding; GO:0003730: mRNA 3'-UTR binding; GO:0005634: nucleus; GO:0005634: nucleus; GO:0005634: nucleus; GO:0005634: nucleus; GO:0005654: nucleoplasm; GO:0005737: cytoplasm; GO:0005737: cytoplasm…
ENSMUSG00000023232	Serinc2	455	454	517	5.3414	5.6021	5.902	-1.17444	1.54853e-06	6.43096e-05	down	4	130147288	130172998	-	protein_coding	serine incorporator 2 [Source:MGI Symbol%3BAcc:MGI:1919132]	K24176: SERINC2; serine incorporator 2		GO:0006658: phosphatidylserine metabolic process; GO:0006665: sphingolipid metabolic process; GO:0016020: membrane; GO:0016021: integral component of membrane; GO:1904219: positive regulation of CDP-diacylglycerol-serine O-phosphatidyltransferase activity; GO:1904222: positive regulation of serine C-palmitoyltransferase activity
ENSMUSG00000043099	Hic1	192	205	154	1.3883	1.5581	1.0828	1.37768	1.65867e-06	6.85154e-05	up	11	75055391	75060345	-	protein_coding	hypermethylated in cancer 1 [Source:MGI Symbol%3BAcc:MGI:1338010]	K24384: HIC; hypermethylated in cancer protein		GO:0000122: negative regulation of transcription by RNA polymerase II; GO:0000122: negative regulation of transcription by RNA polymerase II; GO:0000785: chromatin; GO:0000978: RNA polymerase II cis-regulatory region sequence-specific DNA binding; GO:0000981: DNA-binding transcription factor activity, RNA polymerase II-specific; GO:0001227: DNA-binding transcription repressor activity, RNA polyme…	ZBTB
ENSMUSG00000050440	Hamp	3613	2804	6882	239.897	195.698	444.363	-1.52979	1.6575e-06	6.85154e-05	down	7	30641793	30643457	-	protein_coding	hepcidin antimicrobial peptide [Source:MGI Symbol%3BAcc:MGI:1933533]	K23106: HAMP; hepcidin	mmu04350: TGF-beta signaling pathway - Mus musculus (house mouse)	GO:0000122: negative regulation of transcription by RNA polymerase II; GO:0002092: positive regulation of receptor internalization; GO:0002262: myeloid cell homeostasis; GO:0005102: signaling receptor binding; GO:0005179: hormone activity; GO:0005507: copper ion binding; GO:0005576: extracellular region; GO:0005615: extracellular space; GO:0005615: extracellular space; GO:0005615: extracellular s…
ENSMUSG00000034457	Eda2r	79	28	51	0.3651	0.136	0.2292	3.94867	1.69838e-06	6.99686e-05	up	X	96377446	96420822	-	protein_coding	ectodysplasin A2 receptor [Source:MGI Symbol%3BAcc:MGI:2442860]	K05163: EDA2R, TNFRSF27, XEDAR; tumor necrosis factor receptor superfamily member 27	mmu04060: Cytokine-cytokine receptor interaction - Mus musculus (house mouse); mmu04064: NF-kappa B signaling pathway - Mus musculus (house mouse)	GO:0005031: tumor necrosis factor receptor activity; GO:0005886: plasma membrane; GO:0005887: integral component of plasma membrane; GO:0007275: multicellular organism development; GO:0012501: programmed cell death; GO:0016020: membrane; GO:0016021: integral component of membrane; GO:0030154: cell differentiation; GO:0033209: tumor necrosis factor-mediated signaling pathway; GO:0038023: signaling…
ENSMUSG00000000594	Gm2a	7412	8041	9139	48.8924	55.753	58.6235	0.9217	1.7435e-06	7.16366e-05	false	11	54988941	55003855	+	protein_coding	GM2 ganglioside activator protein [Source:MGI Symbol%3BAcc:MGI:95762]	K12383: GM2A; ganglioside GM2 activator	mmu04142: Lysosome - Mus musculus (house mouse)	GO:0004563: beta-N-acetylhexosaminidase activity; GO:0005319: lipid transporter activity; GO:0005739: mitochondrion; GO:0005764: lysosome; GO:0006629: lipid metabolic process; GO:0006665: sphingolipid metabolic process; GO:0006689: ganglioside catabolic process; GO:0006689: ganglioside catabolic process; GO:0006869: lipid transport; GO:0007611: learning or memory; GO:0008047: enzyme activator act…
ENSMUSG00000028766	Alpl	374	467	364	2.5246	3.3135	2.3894	-0.95002	1.75816e-06	7.20473e-05	false	4	137469044	137523695	-	protein_coding	alkaline phosphatase%2C liver/bone/kidney [Source:MGI Symbol%3BAcc:MGI:87983]	K01077: E3.1.3.1, phoA, phoB; alkaline phosphatase [EC:3.1.3.1]	mmu00730: Thiamine metabolism - Mus musculus (house mouse); mmu00790: Folate biosynthesis - Mus musculus (house mouse); mmu01100: Metabolic pathways - Mus musculus (house mouse); mmu01240: Biosynthesis of cofactors - Mus musculus (house mouse)	GO:0001958: endochondral ossification; GO:0003006: developmental process involved in reproduction; GO:0003824: catalytic activity; GO:0004035: alkaline phosphatase activity; GO:0004035: alkaline phosphatase activity; GO:0004035: alkaline phosphatase activity; GO:0005509: calcium ion binding; GO:0005515: protein binding; GO:0005615: extracellular space; GO:0005739: mitochondrion; GO:0005758: mitoc…
ENSMUSG00000097286	Gm26684	168	289	164	0.4703	0.8504	0.4465	1.68465	1.76288e-06	7.20496e-05	up	15	54815466	54834488	+	lncRNA	predicted gene%2C 26684 [Source:MGI Symbol%3BAcc:MGI:5477178]
ENSMUSG00000006369	Fbln1	83	117	106	0.5173	0.7665	0.6424	1.84462	1.79257e-06	7.30695e-05	up	15	85090150	85170736	+	protein_coding	fibulin 1 [Source:MGI Symbol%3BAcc:MGI:95487]	K17307: FBLN1_2; fibulin 1/2		GO:0001933: negative regulation of protein phosphorylation; GO:0001968: fibronectin binding; GO:0005178: integrin binding; GO:0005201: extracellular matrix structural constituent; GO:0005201: extracellular matrix structural constituent; GO:0005509: calcium ion binding; GO:0005515: protein binding; GO:0005576: extracellular region; GO:0005604: basement membrane; GO:0005615: extracellular space; GO…
ENSMUSG00000030089	Slc41a3	76	54	50	0.7107	0.5308	0.4547	-1.472	1.85797e-06	7.55361e-05	down	6	90581707	90623394	+	protein_coding	solute carrier family 41%2C member 3 [Source:MGI Symbol%3BAcc:MGI:1918949]	K15122: SLC41A; solute carrier family 41		GO:0005515: protein binding; GO:0005886: plasma membrane; GO:0005886: plasma membrane; GO:0006812: cation transport; GO:0008324: cation transmembrane transporter activity; GO:0016020: membrane; GO:0016021: integral component of membrane
ENSMUSG00000045875	Adra1a	132	91	83	0.4117	0.2983	0.2518	-1.45002	1.88814e-06	7.65612e-05	down	14	66872700	67008617	+	protein_coding	adrenergic receptor%2C alpha 1a [Source:MGI Symbol%3BAcc:MGI:104773]	K04135: ADRA1A; adrenergic receptor alpha-1A	mmu04020: Calcium signaling pathway - Mus musculus (house mouse); mmu04022: cGMP-PKG signaling pathway - Mus musculus (house mouse); mmu04080: Neuroactive ligand-receptor interaction - Mus musculus (house mouse); mmu04152: AMPK signaling pathway - Mus musculus (house mouse); mmu04261: Adrenergic signaling in cardiomyocytes - Mus musculus (house mouse); mmu04270: Vascular smooth muscle contraction…	GO:0000165: MAPK cascade; GO:0001985: negative regulation of heart rate involved in baroreceptor response to increased systemic arterial blood pressure; GO:0001994: norepinephrine-epinephrine vasoconstriction involved in regulation of systemic arterial blood pressure; GO:0001996: positive regulation of heart rate by epinephrine-norepinephrine; GO:0001996: positive regulation of heart rate by epin…
ENSMUSG00000034205	Loxl2	226	231	145	1.1383	1.223	0.7102	1.62223	1.91434e-06	7.74206e-05	up	14	69846517	69933283	+	protein_coding	lysyl oxidase-like 2 [Source:MGI Symbol%3BAcc:MGI:2137913]	K00280: LOXL2_3_4; lysyl oxidase-like protein 2/3/4 [EC:1.4.3.-]		GO:0000122: negative regulation of transcription by RNA polymerase II; GO:0000785: chromatin; GO:0001666: response to hypoxia; GO:0001837: epithelial to mesenchymal transition; GO:0001935: endothelial cell proliferation; GO:0002040: sprouting angiogenesis; GO:0004720: protein-lysine 6-oxidase activity; GO:0004720: protein-lysine 6-oxidase activity; GO:0005044: scavenger receptor activity; GO:0005…
ENSMUSG00000010663	Fads1	26986	24647	24341	152.67	146.565	133.912	0.9321	1.93866e-06	7.81995e-05	false	19	10160252	10174241	+	protein_coding	fatty acid desaturase 1 [Source:MGI Symbol%3BAcc:MGI:1923517]	K10224: FADS1; acyl-CoA (8-3)-desaturase (Delta-5 desaturase) [EC:1.14.19.44]	mmu01040: Biosynthesis of unsaturated fatty acids - Mus musculus (house mouse); mmu01100: Metabolic pathways - Mus musculus (house mouse); mmu01212: Fatty acid metabolism - Mus musculus (house mouse)	GO:0005634: nucleus; GO:0005739: mitochondrion; GO:0005783: endoplasmic reticulum; GO:0006629: lipid metabolic process; GO:0006631: fatty acid metabolic process; GO:0006633: fatty acid biosynthetic process; GO:0006636: unsaturated fatty acid biosynthetic process; GO:0009267: cellular response to starvation; GO:0016020: membrane; GO:0016021: integral component of membrane; GO:0016213: linoleoyl-Co…
ENSMUSG00000025351	Cd63	425	437	354	3.1423	3.3962	2.5452	1.83798	1.9685e-06	7.91961e-05	up	10	128736858	128748691	+	protein_coding	CD63 antigen [Source:MGI Symbol%3BAcc:MGI:99529]	K06497: CD63, MLA1, TSPAN30; CD63 antigen	mmu04142: Lysosome - Mus musculus (house mouse); mmu05205: Proteoglycans in cancer - Mus musculus (house mouse)	GO:0002092: positive regulation of receptor internalization; GO:0005515: protein binding; GO:0005576: extracellular region; GO:0005615: extracellular space; GO:0005654: nucleoplasm; GO:0005737: cytoplasm; GO:0005764: lysosome; GO:0005764: lysosome; GO:0005765: lysosomal membrane; GO:0005768: endosome; GO:0005770: late endosome; GO:0005886: plasma membrane; GO:0005887: integral component of plasma…
ENSMUSG00000064080	Fbln2	78	126	69	0.3333	0.566	0.2868	2.16876	2.00252e-06	8.03556e-05	up	6	91189437	91249522	+	protein_coding	fibulin 2 [Source:MGI Symbol%3BAcc:MGI:95488]	K17307: FBLN1_2; fibulin 1/2		GO:0005201: extracellular matrix structural constituent; GO:0005509: calcium ion binding; GO:0005515: protein binding; GO:0005576: extracellular region; GO:0010811: positive regulation of cell-substrate adhesion; GO:0010811: positive regulation of cell-substrate adhesion; GO:0030198: extracellular matrix organization; GO:0050840: extracellular matrix binding; GO:0050840: extracellular matrix bind…
ENSMUSG00000019278	Dpep1	120	90	116	1.3141	1.0359	1.2353	1.98693	2.05655e-06	8.231e-05	up	8	123912981	123928551	+	protein_coding	dipeptidase 1 [Source:MGI Symbol%3BAcc:MGI:94917]	K01273: DPEP; membrane dipeptidase [EC:3.4.13.19]		GO:0005654: nucleoplasm; GO:0005886: plasma membrane; GO:0005886: plasma membrane; GO:0006508: proteolysis; GO:0006629: lipid metabolic process; GO:0006691: leukotriene metabolic process; GO:0006691: leukotriene metabolic process; GO:0006751: glutathione catabolic process; GO:0006954: inflammatory response; GO:0008233: peptidase activity; GO:0008237: metallopeptidase activity; GO:0008270: zinc io…
ENSMUSG00000014329	Bicc1	245	222	174	0.8963	0.8537	0.619	1.31131	2.06963e-06	8.24063e-05	up	10	70758662	70995530	-	protein_coding	BicC family RNA binding protein 1 [Source:MGI Symbol%3BAcc:MGI:1933388]	K18756: BICC1, BICC; protein bicaudal C		GO:0001822: kidney development; GO:0003676: nucleic acid binding; GO:0003723: RNA binding; GO:0005515: protein binding; GO:0005737: cytoplasm; GO:0007275: multicellular organism development; GO:0007368: determination of left/right symmetry; GO:0007507: heart development; GO:0090090: negative regulation of canonical Wnt signaling pathway
ENSMUSG00000038400	Pmepa1	220	188	234	1.219	1.095	1.2609	1.2986	2.06928e-06	8.24063e-05	up	2	173066251	173118326	-	protein_coding	prostate transmembrane protein%2C androgen induced 1 [Source:MGI Symbol%3BAcc:MGI:1929600]			GO:0000139: Golgi membrane; GO:0000139: Golgi membrane; GO:0005515: protein binding; GO:0005768: endosome; GO:0005794: Golgi apparatus; GO:0009968: negative regulation of signal transduction; GO:0010008: endosome membrane; GO:0010991: negative regulation of SMAD protein complex assembly; GO:0010991: negative regulation of SMAD protein complex assembly; GO:0016020: membrane; GO:0016021: integral c…
ENSMUSG00000003477	Inmt	20821	19677	23528	354.26	351.91	389.289	2.03778	2.14683e-06	8.52607e-05	up	6	55147611	55152028	-	protein_coding	indolethylamine N-methyltransferase [Source:MGI Symbol%3BAcc:MGI:102963]	K00562: INMT, TEMT; methyltransferase [EC:2.1.1.49 2.1.1.96]	mmu00380: Tryptophan metabolism - Mus musculus (house mouse); mmu00450: Selenocompound metabolism - Mus musculus (house mouse); mmu01100: Metabolic pathways - Mus musculus (house mouse)	GO:0004790: thioether S-methyltransferase activity; GO:0004790: thioether S-methyltransferase activity; GO:0005737: cytoplasm; GO:0005829: cytosol; GO:0005829: cytosol; GO:0005829: cytosol; GO:0005829: cytosol; GO:0008168: methyltransferase activity; GO:0008170: N-methyltransferase activity; GO:0009308: amine metabolic process; GO:0009636: response to toxic substance; GO:0016740: transferase acti…
ENSMUSG00000034685	Fam171a2	102	123	120	0.8903	1.1285	1.0185	1.66158	2.19712e-06	8.69459e-05	up	11	102327807	102338508	-	protein_coding	family with sequence similarity 171%2C member A2 [Source:MGI Symbol%3BAcc:MGI:2448496]			GO:0003674: molecular_function; GO:0005575: cellular_component; GO:0008150: biological_process; GO:0016020: membrane; GO:0016021: integral component of membrane
ENSMUSG00000052026	Slc6a7	60	34	47	0.4743	0.2825	0.3613	4.52268	2.20052e-06	8.69459e-05	up	18	61128452	61147294	-	protein_coding	solute carrier family 6 (neurotransmitter transporter%2C L-proline)%2C member 7 [Source:MGI Symbol%3BAcc:MGI:2147363]	K05040: SLC6A7, PROT; solute carrier family 6 (neurotransmitter transporter, L-proline) member 7	mmu04721: Synaptic vesicle cycle - Mus musculus (house mouse)	GO:0005887: integral component of plasma membrane; GO:0006836: neurotransmitter transport; GO:0006865: amino acid transport; GO:0015193: L-proline transmembrane transporter activity; GO:0015193: L-proline transmembrane transporter activity; GO:0015193: L-proline transmembrane transporter activity; GO:0015293: symporter activity; GO:0015824: proline transport; GO:0016020: membrane; GO:0016021: int…
ENSMUSG00000067149	Jchain	331	162	201	3.58	1.8417	2.1141	1.62394	2.25196e-06	8.87514e-05	up	5	88667668	88675750	-	protein_coding	immunoglobulin joining chain [Source:MGI Symbol%3BAcc:MGI:96493]	K25567: JCHAIN; immunoglobulin J chain		GO:0002250: adaptive immune response; GO:0003094: glomerular filtration; GO:0003697: single-stranded DNA binding; GO:0003823: antigen binding; GO:0005576: extracellular region; GO:0005615: extracellular space; GO:0006959: humoral immune response; GO:0006959: humoral immune response; GO:0019731: antibacterial humoral response; GO:0019862: IgA binding; GO:0019862: IgA binding; GO:0030674: protein-m…
ENSMUSG00000041769	Ppp2r2d	1313	1255	1309	6.0553	6.0836	5.8705	-0.6845	2.30398e-06	9.05706e-05	false	7	138447808	138484786	+	protein_coding	protein phosphatase 2%2C regulatory subunit B%2C delta [Source:MGI Symbol%3BAcc:MGI:1289252]	K04354: PPP2R2; serine/threonine-protein phosphatase 2A regulatory subunit B	mmu03015: mRNA surveillance pathway - Mus musculus (house mouse); mmu04071: Sphingolipid signaling pathway - Mus musculus (house mouse); mmu04151: PI3K-Akt signaling pathway - Mus musculus (house mouse); mmu04152: AMPK signaling pathway - Mus musculus (house mouse); mmu04261: Adrenergic signaling in cardiomyocytes - Mus musculus (house mouse); mmu04390: Hippo signaling pathway - Mus musculus (hou…	GO:0000159: protein phosphatase type 2A complex; GO:0005737: cytoplasm; GO:0005829: cytosol; GO:0007049: cell cycle; GO:0019888: protein phosphatase regulator activity; GO:0051301: cell division
ENSMUSG00000034413	Neurl1b	63	123	62	0.2709	0.5559	0.2593	2.4358	2.32643e-06	9.12207e-05	up	17	26633803	26665323	+	protein_coding	neuralized E3 ubiquitin protein ligase 1B [Source:MGI Symbol%3BAcc:MGI:3643092]	K01931: NEUR; protein neuralized [EC:2.3.2.27]		GO:0005515: protein binding; GO:0005737: cytoplasm; GO:0005769: early endosome; GO:0005769: early endosome; GO:0005829: cytosol; GO:0007219: Notch signaling pathway; GO:0015629: actin cytoskeleton; GO:0016740: transferase activity; GO:0046872: metal ion binding; GO:0061630: ubiquitin protein ligase activity; GO:0061630: ubiquitin protein ligase activity; GO:0070086: ubiquitin-dependent endocytosi…
ENSMUSG00000027562	Car2	273	327	211	3.0685	3.8634	2.3063	1.28203	2.39332e-06	9.3606e-05	up	3	14951333	14965830	+	protein_coding	carbonic anhydrase 2 [Source:MGI Symbol%3BAcc:MGI:88269]	K18245: CA2; carbonic anhydrase 2 [EC:4.2.1.1]	mmu00910: Nitrogen metabolism - Mus musculus (house mouse); mmu01100: Metabolic pathways - Mus musculus (house mouse); mmu04964: Proximal tubule bicarbonate reclamation - Mus musculus (house mouse); mmu04966: Collecting duct acid secretion - Mus musculus (house mouse); mmu04971: Gastric acid secretion - Mus musculus (house mouse); mmu04972: Pancreatic secretion - Mus musculus (house mouse); mmu04…	GO:0002009: morphogenesis of an epithelium; GO:0004064: arylesterase activity; GO:0004089: carbonate dehydratase activity; GO:0004089: carbonate dehydratase activity; GO:0004089: carbonate dehydratase activity; GO:0004089: carbonate dehydratase activity; GO:0005615: extracellular space; GO:0005737: cytoplasm; GO:0005737: cytoplasm; GO:0005829: cytosol; GO:0005886: plasma membrane; GO:0005886: pla…
ENSMUSG00000089809	Rasgef1b	635	598	524	1.2522	1.2395	1.0049	-1.4274	2.43337e-06	9.49323e-05	down	5	99365285	99876924	-	protein_coding	RasGEF domain family%2C member 1B [Source:MGI Symbol%3BAcc:MGI:2443755]			GO:0003674: molecular_function; GO:0005575: cellular_component; GO:0008150: biological_process; GO:0005085: guanyl-nucleotide exchange factor activity; GO:0005085: guanyl-nucleotide exchange factor activity; GO:0005886: plasma membrane; GO:0007265: Ras protein signal transduction; GO:0043547: positive regulation of GTPase activity
ENSMUSG00000016458	Wt1	66	59	50	0.29	0.2725	0.2137	3.23339	2.45327e-06	9.54673e-05	up	2	104956874	105003961	+	protein_coding	WT1 transcription factor [Source:MGI Symbol%3BAcc:MGI:98968]	K09234: WT1; Wilms tumor protein 1	mmu05202: Transcriptional misregulation in cancer - Mus musculus (house mouse)	GO:0000122: negative regulation of transcription by RNA polymerase II; GO:0000976: transcription cis-regulatory region binding; GO:0000978: RNA polymerase II cis-regulatory region sequence-specific DNA binding; GO:0000978: RNA polymerase II cis-regulatory region sequence-specific DNA binding; GO:0000981: DNA-binding transcription factor activity, RNA polymerase II-specific; GO:0001228: DNA-bindin…	zf-C2H2
ENSMUSG00000020381	Mrnip	178	236	221	2.3765	3.312	2.8693	1.30033	2.46868e-06	9.58259e-05	up	11	50065271	50090942	+	protein_coding	MRN complex interacting protein [Source:MGI Symbol%3BAcc:MGI:1915317]			GO:0003682: chromatin binding; GO:0003682: chromatin binding; GO:0005634: nucleus; GO:0005634: nucleus; GO:0005654: nucleoplasm; GO:0006281: DNA repair; GO:0006974: cellular response to DNA damage stimulus; GO:0007095: mitotic G2 DNA damage checkpoint signaling; GO:0007095: mitotic G2 DNA damage checkpoint signaling; GO:0010212: response to ionizing radiation; GO:0030870: Mre11 complex; GO:004586…
ENSMUSG00000017639	Rab11fip4	285	195	339	1.0413	0.7489	1.2045	-1.29338	2.47542e-06	9.58463e-05	down	11	79482038	79588849	+	protein_coding	RAB11 family interacting protein 4 (class II) [Source:MGI Symbol%3BAcc:MGI:2442920]	K12485: RAB11FIP3_4; Rab11 family-interacting protein 3/4	mmu04144: Endocytosis - Mus musculus (house mouse)	GO:0005509: calcium ion binding; GO:0005768: endosome; GO:0007049: cell cycle; GO:0016020: membrane; GO:0030139: endocytic vesicle; GO:0030139: endocytic vesicle; GO:0030496: midbody; GO:0030496: midbody; GO:0031267: small GTPase binding; GO:0031410: cytoplasmic vesicle; GO:0032154: cleavage furrow; GO:0032154: cleavage furrow; GO:0032456: endocytic recycling; GO:0032465: regulation of cytokinesi…
ENSMUSG00000024335	Brd2	4136	3435	3729	14.3874	12.5597	12.6142	-0.81565	2.49618e-06	9.64087e-05	false	17	34330997	34341608	-	protein_coding	bromodomain containing 2 [Source:MGI Symbol%3BAcc:MGI:99495]	K08871: BRD2; bromodomain-containing protein 2		GO:0000785: chromatin; GO:0001843: neural tube closure; GO:0003682: chromatin binding; GO:0004674: protein serine/threonine kinase activity; GO:0005634: nucleus; GO:0005634: nucleus; GO:0005634: nucleus; GO:0005654: nucleoplasm; GO:0005737: cytoplasm; GO:0006325: chromatin organization; GO:0006334: nucleosome assembly; GO:0006338: chromatin remodeling; GO:0006355: regulation of DNA-templated tran…
ENSMUSG00000019467	Arhgef25	153	146	175	1.0429	1.046	1.1599	1.31888	2.54424e-06	9.80198e-05	up	10	127018394	127025952	-	protein_coding	Rho guanine nucleotide exchange factor (GEF) 25 [Source:MGI Symbol%3BAcc:MGI:1277173]	K20690: ARHGEF25; Rho guanine nucleotide exchange factor 25		GO:0005085: guanyl-nucleotide exchange factor activity; GO:0005515: protein binding; GO:0005737: cytoplasm; GO:0005886: plasma membrane; GO:0005886: plasma membrane; GO:0007411: axon guidance; GO:0016020: membrane; GO:0019898: extrinsic component of membrane; GO:0030016: myofibril; GO:0035023: regulation of Rho protein signal transduction
ENSMUSG00000074364	Ehd2	256	233	205	1.3614	1.3025	1.0602	1.28385	2.56659e-06	9.86351e-05	up	7	15680883	15701492	-	protein_coding	EH-domain containing 2 [Source:MGI Symbol%3BAcc:MGI:2154274]	K12469: EHD2; EH domain-containing protein 2	mmu04144: Endocytosis - Mus musculus (house mouse)	GO:0000166: nucleotide binding; GO:0005509: calcium ion binding; GO:0005515: protein binding; GO:0005524: ATP binding; GO:0005525: GTP binding; GO:0005737: cytoplasm; GO:0005768: endosome; GO:0005769: early endosome; GO:0005829: cytosol; GO:0005886: plasma membrane; GO:0005886: plasma membrane; GO:0005886: plasma membrane; GO:0005901: caveola; GO:0005901: caveola; GO:0006897: endocytosis; GO:0006…
ENSMUSG00000030616	Sytl2	105	138	77	0.2049	0.2831	0.1461	2.03206	2.62066e-06	0.000100463	up	7	89951460	90059927	+	protein_coding	synaptotagmin-like 2 [Source:MGI Symbol%3BAcc:MGI:1933366]	K17598: SYTL; synaptotagmin-like protein		GO:0001786: phosphatidylserine binding; GO:0005515: protein binding; GO:0005546: phosphatidylinositol-4,5-bisphosphate binding; GO:0005737: cytoplasm; GO:0005886: plasma membrane; GO:0005886: plasma membrane; GO:0005886: plasma membrane; GO:0006886: intracellular protein transport; GO:0006887: exocytosis; GO:0006887: exocytosis; GO:0006887: exocytosis; GO:0006904: vesicle docking involved in exoc…
ENSMUSG00000035049	Rrp12	245	212	270	1.5368	1.3978	1.647	-0.89905	2.66295e-06	0.000101831	false	19	41851290	41884612	-	protein_coding	ribosomal RNA processing 12 homolog [Source:MGI Symbol%3BAcc:MGI:2147437]	K14794: RRP12; ribosomal RNA-processing protein 12		GO:0005634: nucleus; GO:0005730: nucleolus; GO:0005730: nucleolus; GO:0005829: cytosol; GO:0005886: plasma membrane; GO:0006364: rRNA processing; GO:0016020: membrane; GO:0016021: integral component of membrane; GO:0043231: intracellular membrane-bounded organelle
ENSMUSG00000027784	Ppm1l	450	358	349	1.1672	0.976	0.8803	-0.89683	2.72759e-06	0.000104046	false	3	69224194	69468135	+	protein_coding	protein phosphatase 1 (formerly 2C)-like [Source:MGI Symbol%3BAcc:MGI:2139740]	K17506: PPM1L, PP2CE; protein phosphatase 1L [EC:3.1.3.16]		GO:0000165: MAPK cascade; GO:0004721: phosphoprotein phosphatase activity; GO:0004722: protein serine/threonine phosphatase activity; GO:0005515: protein binding; GO:0006470: protein dephosphorylation; GO:0007178: transmembrane receptor protein serine/threonine kinase signaling pathway; GO:0016020: membrane; GO:0016021: integral component of membrane; GO:0016787: hydrolase activity; GO:0016791: p…
ENSMUSG00000021061	Sptb	10	11	10	0.0224	0.0259	0.0218	-2.20724	2.75398e-06	0.000104794	down	12	76627262	76757321	-	protein_coding	spectrin beta%2C erythrocytic [Source:MGI Symbol%3BAcc:MGI:98387]	K06115: SPTB; spectrin beta		GO:0003779: actin binding; GO:0005200: structural constituent of cytoskeleton; GO:0005515: protein binding; GO:0005737: cytoplasm; GO:0005829: cytosol; GO:0005856: cytoskeleton; GO:0005886: plasma membrane; GO:0005886: plasma membrane; GO:0006779: porphyrin-containing compound biosynthetic process; GO:0007009: plasma membrane organization; GO:0008091: spectrin; GO:0009986: cell surface; GO:001473…
ENSMUSG00000032231	Anxa2	813	1112	822	5.9321	8.5285	5.8325	1.42854	2.76464e-06	0.000104941	up	9	69360902	69399077	+	protein_coding	annexin A2 [Source:MGI Symbol%3BAcc:MGI:88246]	K17092: ANXA2; annexin A2	mmu05132: Salmonella infection - Mus musculus (house mouse)	GO:0001525: angiogenesis; GO:0001533: cornified envelope; GO:0001725: stress fiber; GO:0001726: ruffle; GO:0001786: phosphatidylserine binding; GO:0001921: positive regulation of receptor recycling; GO:0001934: positive regulation of protein phosphorylation; GO:0002020: protease binding; GO:0002020: protease binding; GO:0004859: phospholipase inhibitor activity; GO:0004867: serine-type endopeptid…
ENSMUSG00000002325	Irf9	1840	1385	1627	9.3002	7.3583	7.997	-0.79307	2.80116e-06	0.000106066	false	14	55841028	55847487	+	protein_coding	interferon regulatory factor 9 [Source:MGI Symbol%3BAcc:MGI:107587]	K04693: IRF9, ISGF3G, P48; interferon regulatory factor 9	mmu04217: Necroptosis - Mus musculus (house mouse); mmu04380: Osteoclast differentiation - Mus musculus (house mouse); mmu04621: NOD-like receptor signaling pathway - Mus musculus (house mouse); mmu04625: C-type lectin receptor signaling pathway - Mus musculus (house mouse); mmu04630: JAK-STAT signaling pathway - Mus musculus (house mouse); mmu05160: Hepatitis C - Mus musculus (house mouse); mmu0…	GO:0000976: transcription cis-regulatory region binding; GO:0000978: RNA polymerase II cis-regulatory region sequence-specific DNA binding; GO:0000978: RNA polymerase II cis-regulatory region sequence-specific DNA binding; GO:0000981: DNA-binding transcription factor activity, RNA polymerase II-specific; GO:0002376: immune system process; GO:0003677: DNA binding; GO:0003700: DNA-binding transcrip…	IRF
ENSMUSG00000024411	Aqp4	193	311	144	0.8429	1.4278	0.6116	2.0027	2.82021e-06	0.000106527	up	18	15522553	15544039	-	protein_coding	aquaporin 4 [Source:MGI Symbol%3BAcc:MGI:107387]	K09866: AQP4; aquaporin-4	mmu04962: Vasopressin-regulated water reabsorption - Mus musculus (house mouse); mmu04976: Bile secretion - Mus musculus (house mouse)	GO:0005515: protein binding; GO:0005737: cytoplasm; GO:0005737: cytoplasm; GO:0005768: endosome; GO:0005886: plasma membrane; GO:0005886: plasma membrane; GO:0005886: plasma membrane; GO:0005887: integral component of plasma membrane; GO:0005887: integral component of plasma membrane; GO:0005887: integral component of plasma membrane; GO:0005911: cell-cell junction; GO:0006833: water transport; G…
ENSMUSG00000032058	Ppp2r1b	881	770	735	3.719	3.4166	3.0172	-0.72502	2.84498e-06	0.0001072	false	9	50756601	50805529	+	protein_coding	protein phosphatase 2%2C regulatory subunit A%2C beta [Source:MGI Symbol%3BAcc:MGI:1920949]	K03456: PPP2R1; serine/threonine-protein phosphatase 2A regulatory subunit A	mmu03015: mRNA surveillance pathway - Mus musculus (house mouse); mmu04071: Sphingolipid signaling pathway - Mus musculus (house mouse); mmu04114: Oocyte meiosis - Mus musculus (house mouse); mmu04151: PI3K-Akt signaling pathway - Mus musculus (house mouse); mmu04152: AMPK signaling pathway - Mus musculus (house mouse); mmu04261: Adrenergic signaling in cardiomyocytes - Mus musculus (house mouse)…	GO:0000159: protein phosphatase type 2A complex; GO:0005515: protein binding; GO:0005737: cytoplasm; GO:0006470: protein dephosphorylation; GO:0019888: protein phosphatase regulator activity; GO:0045121: membrane raft; GO:0045202: synapse; GO:0045202: synapse; GO:0060561: apoptotic process involved in morphogenesis; GO:0098978: glutamatergic synapse; GO:0098978: glutamatergic synapse; GO:2001241:…
ENSMUSG00000024371	C2	1188	966	1032	8.3526	7.139	7.0559	-0.81296	2.86545e-06	0.000107448	false	17	35081580	35117241	-	protein_coding	complement component 2 (within H-2S) [Source:MGI Symbol%3BAcc:MGI:88226]	K01332: C2; complement component 2 [EC:3.4.21.43]	mmu04610: Complement and coagulation cascades - Mus musculus (house mouse); mmu04936: Alcoholic liver disease - Mus musculus (house mouse); mmu05133: Pertussis - Mus musculus (house mouse); mmu05150: Staphylococcus aureus infection - Mus musculus (house mouse); mmu05171: Coronavirus disease - COVID-19 - Mus musculus (house mouse); mmu05322: Systemic lupus erythematosus - Mus musculus (house mouse)	GO:0002376: immune system process; GO:0004252: serine-type endopeptidase activity; GO:0005576: extracellular region; GO:0005601: classical-complement-pathway C3/C5 convertase complex; GO:0005601: classical-complement-pathway C3/C5 convertase complex; GO:0005615: extracellular space; GO:0005886: plasma membrane; GO:0006508: proteolysis; GO:0006956: complement activation; GO:0006956: complement act…
ENSMUSG00000072941	Sod3	2295	1984	2498	16.7141	15.1878	17.6913	1.03802	2.86547e-06	0.000107448	up	5	52521133	52528760	+	protein_coding	superoxide dismutase 3%2C extracellular [Source:MGI Symbol%3BAcc:MGI:103181]	K16627: SOD3; superoxide dismutase, Cu-Zn family [EC:1.15.1.1]		GO:0001666: response to hypoxia; GO:0004784: superoxide dismutase activity; GO:0004784: superoxide dismutase activity; GO:0004784: superoxide dismutase activity; GO:0005507: copper ion binding; GO:0005515: protein binding; GO:0005576: extracellular region; GO:0005615: extracellular space; GO:0005615: extracellular space; GO:0005615: extracellular space; GO:0005634: nucleus; GO:0005737: cytoplasm;…
ENSMUSG00000100005	B130024G19Rik	59	81	71	0.1691	0.244	0.1979	2.12898	2.87852e-06	0.000107676	up	7	70014658	70139720	+	lncRNA	RIKEN cDNA B130024G19 gene [Source:MGI Symbol%3BAcc:MGI:3604353]			GO:0003674: molecular_function; GO:0005575: cellular_component; GO:0008150: biological_process
ENSMUSG00000060807	Serpina6	7732	6138	8437	119.529	99.7379	126.834	1.3068	2.94083e-06	0.000109741	up	12	103612889	103623471	-	protein_coding	serine (or cysteine) peptidase inhibitor%2C clade A%2C member 6 [Source:MGI Symbol%3BAcc:MGI:88278]	K04525: SERPINA; serpin A		GO:0004867: serine-type endopeptidase inhibitor activity; GO:0005496: steroid binding; GO:0005496: steroid binding; GO:0005496: steroid binding; GO:0005576: extracellular region; GO:0005615: extracellular space; GO:0005615: extracellular space; GO:0008211: glucocorticoid metabolic process; GO:0008289: lipid binding; GO:0010951: negative regulation of endopeptidase activity
ENSMUSG00000086765	Gm11827	152	102	216	2.9079	2.0511	4.0184	1.91341	3.01918e-06	0.000112393	up	4	11122805	11126998	+	lncRNA	predicted gene 11827 [Source:MGI Symbol%3BAcc:MGI:3649801]			GO:0003674: molecular_function; GO:0005575: cellular_component; GO:0008150: biological_process
ENSMUSG00000070495	Ctcfl	69	69	89	0.5839	0.6137	0.7324	-1.22898	3.22069e-06	0.000119607	down	2	172935402	172961318	-	protein_coding	CCCTC-binding factor (zinc finger protein)-like [Source:MGI Symbol%3BAcc:MGI:3652571]	K23195: CTCF, CTCFL; transcriptional repressor CTCF		GO:0000976: transcription cis-regulatory region binding; GO:0000978: RNA polymerase II cis-regulatory region sequence-specific DNA binding; GO:0000978: RNA polymerase II cis-regulatory region sequence-specific DNA binding; GO:0000981: DNA-binding transcription factor activity, RNA polymerase II-specific; GO:0001228: DNA-binding transcription activator activity, RNA polymerase II-specific; GO:0003…	zf-C2H2
ENSMUSG00000018486	Wnt9b	99	88	90	0.5965	0.5574	0.5274	1.64585	3.23789e-06	0.000119817	up	11	103618190	103640647	-	protein_coding	wingless-type MMTV integration site family%2C member 9B [Source:MGI Symbol%3BAcc:MGI:1197020]	K01064: WNT9; wingless-type MMTV integration site family, member 9	mmu04150: mTOR signaling pathway - Mus musculus (house mouse); mmu04310: Wnt signaling pathway - Mus musculus (house mouse); mmu04390: Hippo signaling pathway - Mus musculus (house mouse); mmu04550: Signaling pathways regulating pluripotency of stem cells - Mus musculus (house mouse); mmu04916: Melanogenesis - Mus musculus (house mouse); mmu04934: Cushing syndrome - Mus musculus (house mouse); mm…	GO:0001658: branching involved in ureteric bud morphogenesis; GO:0001658: branching involved in ureteric bud morphogenesis; GO:0001701: in utero embryonic development; GO:0001822: kidney development; GO:0001932: regulation of protein phosphorylation; GO:0003339: regulation of mesenchymal to epithelial transition involved in metanephros morphogenesis; GO:0003339: regulation of mesenchymal to epith…
ENSMUSG00000027322	Siglec1	940	638	594	3.5825	2.5558	2.2015	-1.00842	3.24186e-06	0.000119817	down	2	130911140	130928685	-	protein_coding	sialic acid binding Ig-like lectin 1%2C sialoadhesin [Source:MGI Symbol%3BAcc:MGI:99668]	K06548: SN, SIGLEC1, CD169; sialoadhesin	mmu04514: Cell adhesion molecules - Mus musculus (house mouse)	GO:0005515: protein binding; GO:0005576: extracellular region; GO:0005769: early endosome; GO:0005770: late endosome; GO:0005886: plasma membrane; GO:0006897: endocytosis; GO:0007155: cell adhesion; GO:0016020: membrane; GO:0016021: integral component of membrane; GO:0030246: carbohydrate binding; GO:0046790: virion binding; GO:0070234: positive regulation of T cell apoptotic process; GO:0075512:…
ENSMUSG00000041468	Gpr12	88	88	126	0.9537	1.0024	1.3279	1.93742	3.28676e-06	0.000120898	up	5	146519208	146522049	-	protein_coding	G-protein coupled receptor 12 [Source:MGI Symbol%3BAcc:MGI:101909]	K04315: GPR12; G protein-coupled receptor 12		GO:0004930: G protein-coupled receptor activity; GO:0005737: cytoplasm; GO:0005886: plasma membrane; GO:0006874: cellular calcium ion homeostasis; GO:0007165: signal transduction; GO:0007186: G protein-coupled receptor signaling pathway; GO:0007189: adenylate cyclase-activating G protein-coupled receptor signaling pathway; GO:0016020: membrane; GO:0016021: integral component of membrane; GO:00192…
ENSMUSG00000062061	Obp2a	1	0	0	0.0366	0	0	-6.39098	3.28565e-06	0.000120898	down	2	25590055	25593338	+	protein_coding	odorant binding protein 2A [Source:MGI Symbol%3BAcc:MGI:2387617]	K25352: OBP2; odorant-binding protein 2		GO:0005576: extracellular region; GO:0005615: extracellular space; GO:0005615: extracellular space; GO:0008286: insulin receptor signaling pathway; GO:0010906: regulation of glucose metabolic process; GO:0032000: positive regulation of fatty acid beta-oxidation; GO:0036094: small molecule binding; GO:0042593: glucose homeostasis; GO:0045721: negative regulation of gluconeogenesis; GO:0051055: neg…
ENSMUSG00000027288	Zfp106	2195	1777	1959	5.7297	4.8757	4.9728	-0.67167	3.30761e-06	0.000121376	false	2	120337301	120394324	-	protein_coding	zinc finger protein 106 [Source:MGI Symbol%3BAcc:MGI:1270153]	K24691: ZNF106; zinc finger protein 106		GO:0001515: opioid peptide activity; GO:0003723: RNA binding; GO:0005634: nucleus; GO:0005829: cytosol; GO:0005829: cytosol; GO:0008286: insulin receptor signaling pathway; GO:0008286: insulin receptor signaling pathway; GO:0016020: membrane; GO:0016020: membrane; GO:0017124: SH3 domain binding; GO:0017124: SH3 domain binding; GO:0046872: metal ion binding
ENSMUSG00000023079	Gtf2ird1	556	606	432	1.9932	2.2835	1.506	-0.92118	3.31807e-06	0.000121471	false	5	134386510	134485570	-	protein_coding	general transcription factor II I repeat domain-containing 1 [Source:MGI Symbol%3BAcc:MGI:1861942]	K03121: TFII-I, GTF2I; transcription initiation factor TFII-I	mmu03022: Basal transcription factors - Mus musculus (house mouse); mmu04022: cGMP-PKG signaling pathway - Mus musculus (house mouse)	GO:0000122: negative regulation of transcription by RNA polymerase II; GO:0000978: RNA polymerase II cis-regulatory region sequence-specific DNA binding; GO:0001227: DNA-binding transcription repressor activity, RNA polymerase II-specific; GO:0003677: DNA binding; GO:0003700: DNA-binding transcription factor activity; GO:0003700: DNA-binding transcription factor activity; GO:0005634: nucleus; GO:…	GTF2I
ENSMUSG00000021518	Ptdss1	1433	1031	1185	9.085	6.8705	7.3057	-0.79178	3.3334e-06	0.000121744	false	13	67080894	67146465	+	protein_coding	phosphatidylserine synthase 1 [Source:MGI Symbol%3BAcc:MGI:1276575]	K08729: PTDSS1; phosphatidylserine synthase 1 [EC:2.7.8.-]	mmu00564: Glycerophospholipid metabolism - Mus musculus (house mouse); mmu01100: Metabolic pathways - Mus musculus (house mouse)	GO:0005783: endoplasmic reticulum; GO:0005789: endoplasmic reticulum membrane; GO:0006629: lipid metabolic process; GO:0006659: phosphatidylserine biosynthetic process; GO:0008654: phospholipid biosynthetic process; GO:0016020: membrane; GO:0016021: integral component of membrane; GO:0016740: transferase activity; GO:0106245: L-serine-phosphatidylethanolamine phosphatidyltransferase activity; GO:…
ENSMUSG00000028978	Nos3	291	273	325	1.9172	1.8906	2.0822	1.16228	3.46324e-06	0.000126188	up	5	24569808	24589472	+	protein_coding	nitric oxide synthase 3%2C endothelial cell [Source:MGI Symbol%3BAcc:MGI:97362]	K13242: NOS3; nitric-oxide synthase, endothelial [EC:1.14.13.39]	mmu00220: Arginine biosynthesis - Mus musculus (house mouse); mmu00330: Arginine and proline metabolism - Mus musculus (house mouse); mmu01100: Metabolic pathways - Mus musculus (house mouse); mmu04020: Calcium signaling pathway - Mus musculus (house mouse); mmu04022: cGMP-PKG signaling pathway - Mus musculus (house mouse); mmu04066: HIF-1 signaling pathway - Mus musculus (house mouse); mmu04071:…	GO:0001525: angiogenesis; GO:0001542: ovulation from ovarian follicle; GO:0001701: in utero embryonic development; GO:0001974: blood vessel remodeling; GO:0002028: regulation of sodium ion transport; GO:0003057: regulation of the force of heart contraction by chemical signal; GO:0003100: regulation of systemic arterial blood pressure by endothelin; GO:0003180: aortic valve morphogenesis; GO:00031…
ENSMUSG00000026879	Gsn	1263	1156	1295	10.891	10.4779	10.8593	1.18688	3.52117e-06	0.000127997	up	2	35146392	35197904	+	protein_coding	gelsolin [Source:MGI Symbol%3BAcc:MGI:95851]	K05768: GSN; gelsolin	mmu04666: Fc gamma R-mediated phagocytosis - Mus musculus (house mouse); mmu04810: Regulation of actin cytoskeleton - Mus musculus (house mouse); mmu05203: Viral carcinogenesis - Mus musculus (house mouse)	GO:0001726: ruffle; GO:0002102: podosome; GO:0003779: actin binding; GO:0005509: calcium ion binding; GO:0005515: protein binding; GO:0005546: phosphatidylinositol-4,5-bisphosphate binding; GO:0005576: extracellular region; GO:0005615: extracellular space; GO:0005615: extracellular space; GO:0005615: extracellular space; GO:0005634: nucleus; GO:0005737: cytoplasm; GO:0005737: cytoplasm; GO:000582…
ENSMUSG00000029657	Hsph1	2394	2117	2424	8.9695	8.3372	8.8317	-1.54149	3.68772e-06	0.000133736	down	5	149537752	149559841	-	protein_coding	heat shock 105kDa/110kDa protein 1 [Source:MGI Symbol%3BAcc:MGI:105053]	K09485: HSP110; heat shock protein 110kDa	mmu04141: Protein processing in endoplasmic reticulum - Mus musculus (house mouse)	GO:0000166: nucleotide binding; GO:0000774: adenyl-nucleotide exchange factor activity; GO:0005515: protein binding; GO:0005524: ATP binding; GO:0005576: extracellular region; GO:0005634: nucleus; GO:0005654: nucleoplasm; GO:0005737: cytoplasm; GO:0005829: cytosol; GO:0005829: cytosol; GO:0005874: microtubule; GO:0006457: protein folding; GO:0006986: response to unfolded protein; GO:0016887: ATP …
ENSMUSG00000022325	Pop1	193	181	174	1.3845	1.3648	1.2138	-1.13198	3.70812e-06	0.000134161	down	15	34495450	34530794	+	protein_coding	processing of precursor 1%2C ribonuclease P/MRP family%2C (S. cerevisiae) [Source:MGI Symbol%3BAcc:MGI:1914974]	K01164: POP1; ribonuclease P/MRP protein subunit POP1 [EC:3.1.26.5]	mmu03008: Ribosome biogenesis in eukaryotes - Mus musculus (house mouse)	GO:0000172: ribonuclease MRP complex; GO:0000172: ribonuclease MRP complex; GO:0001682: tRNA 5'-leader removal; GO:0004526: ribonuclease P activity; GO:0005655: nucleolar ribonuclease P complex; GO:0005655: nucleolar ribonuclease P complex; GO:0005730: nucleolus; GO:0008033: tRNA processing; GO:0016078: tRNA catabolic process; GO:0030681: multimeric ribonuclease P complex; GO:0033204: ribonucleas…
ENSMUSG00000023885	Thbs2	286	234	159	1.1118	0.9561	0.6011	1.56529	3.72565e-06	0.00013448	up	17	14885762	14914497	-	protein_coding	thrombospondin 2 [Source:MGI Symbol%3BAcc:MGI:98738]	K04659: THBS2S; thrombospondin 2/3/4/5	mmu04145: Phagosome - Mus musculus (house mouse); mmu04151: PI3K-Akt signaling pathway - Mus musculus (house mouse); mmu04510: Focal adhesion - Mus musculus (house mouse); mmu04512: ECM-receptor interaction - Mus musculus (house mouse); mmu05144: Malaria - Mus musculus (house mouse); mmu05165: Human papillomavirus infection - Mus musculus (house mouse)	GO:0005509: calcium ion binding; GO:0005515: protein binding; GO:0005576: extracellular region; GO:0005604: basement membrane; GO:0007155: cell adhesion; GO:0008201: heparin binding; GO:0016525: negative regulation of angiogenesis; GO:0016525: negative regulation of angiogenesis; GO:0016525: negative regulation of angiogenesis; GO:0031012: extracellular matrix; GO:0031091: platelet alpha granule;…
ENSMUSG00000073842	Mup7	4582	2894	8865	120.752	80.1661	227.188	-3.48363	3.75613e-06	0.000135265	down	4	60066469	60070475	-	protein_coding	major urinary protein 7 [Source:MGI Symbol%3BAcc:MGI:3709615]			GO:0003674: molecular_function; GO:0005549: odorant binding; GO:0005615: extracellular space; GO:0005615: extracellular space; GO:0008150: biological_process
ENSMUSG00000016024	Lbp	5736	5034	5675	32.3231	29.8173	31.0983	-1.8293	3.77972e-06	0.000135482	down	2	158148413	158174772	+	protein_coding	lipopolysaccharide binding protein [Source:MGI Symbol%3BAcc:MGI:1098776]	K05399: LBP; lipopolysaccharide-binding protein	mmu04064: NF-kappa B signaling pathway - Mus musculus (house mouse); mmu04620: Toll-like receptor signaling pathway - Mus musculus (house mouse); mmu04936: Alcoholic liver disease - Mus musculus (house mouse); mmu05152: Tuberculosis - Mus musculus (house mouse); mmu05417: Lipid and atherosclerosis - Mus musculus (house mouse)	GO:0001530: lipopolysaccharide binding; GO:0001530: lipopolysaccharide binding; GO:0001530: lipopolysaccharide binding; GO:0002232: leukocyte chemotaxis involved in inflammatory response; GO:0002281: macrophage activation involved in immune response; GO:0002281: macrophage activation involved in immune response; GO:0002281: macrophage activation involved in immune response; GO:0002376: immune sys…
ENSMUSG00000024423	Impact	403	318	389	2.139	1.7741	2.0078	-0.82016	3.77609e-06	0.000135482	false	18	13088909	13126007	+	protein_coding	impact%2C RWD domain protein [Source:MGI Symbol%3BAcc:MGI:1098233]			GO:0000122: negative regulation of transcription by RNA polymerase II; GO:0001933: negative regulation of protein phosphorylation; GO:0001933: negative regulation of protein phosphorylation; GO:0003779: actin binding; GO:0005515: protein binding; GO:0005737: cytoplasm; GO:0005829: cytosol; GO:0005844: polysome; GO:0006417: regulation of translation; GO:0006446: regulation of translational initiat…
ENSMUSG00000023087	Noct	482	385	528	1.2312	1.0337	1.3115	-1.66789	3.8054e-06	0.000136087	down	3	51131868	51159065	+	protein_coding	nocturnin [Source:MGI Symbol%3BAcc:MGI:109382]	K18764: NOCT, CCRN4L; nocturnin [EC:3.1.3.108]		GO:0000175: 3'-5'-exoribonuclease activity; GO:0000290: deadenylation-dependent decapping of nuclear-transcribed mRNA; GO:0000932: P-body; GO:0003723: RNA binding; GO:0003729: mRNA binding; GO:0004535: poly(A)-specific ribonuclease activity; GO:0004535: poly(A)-specific ribonuclease activity; GO:0005515: protein binding; GO:0005634: nucleus; GO:0005737: cytoplasm; GO:0005739: mitochondrion; GO:00…
ENSMUSG00000015647	Lama5	291	294	258	0.6956	0.7387	0.5998	1.05266	3.86425e-06	0.000137872	up	2	179818166	179867652	-	protein_coding	laminin%2C alpha 5 [Source:MGI Symbol%3BAcc:MGI:105382]	K06240: LAMA3_5; laminin, alpha 3/5	mmu04151: PI3K-Akt signaling pathway - Mus musculus (house mouse); mmu04510: Focal adhesion - Mus musculus (house mouse); mmu04512: ECM-receptor interaction - Mus musculus (house mouse); mmu05145: Toxoplasmosis - Mus musculus (house mouse); mmu05146: Amoebiasis - Mus musculus (house mouse); mmu05165: Human papillomavirus infection - Mus musculus (house mouse); mmu05200: Pathways in cancer - Mus m…	GO:0001658: branching involved in ureteric bud morphogenesis; GO:0001738: morphogenesis of a polarized epithelium; GO:0001738: morphogenesis of a polarized epithelium; GO:0001755: neural crest cell migration; GO:0001822: kidney development; GO:0001942: hair follicle development; GO:0005102: signaling receptor binding; GO:0005178: integrin binding; GO:0005178: integrin binding; GO:0005178: integri…
ENSMUSG00000020427	Igfbp3	1412	1340	1199	12.2809	12.2505	10.141	1.36864	3.98869e-06	0.000141984	up	11	7156086	7163923	-	protein_coding	insulin-like growth factor binding protein 3 [Source:MGI Symbol%3BAcc:MGI:96438]	K10138: IGFBP3; insulin-like growth factor-binding protein 3	mmu04115: p53 signaling pathway - Mus musculus (house mouse); mmu04218: Cellular senescence - Mus musculus (house mouse); mmu04935: Growth hormone synthesis, secretion and action - Mus musculus (house mouse); mmu05202: Transcriptional misregulation in cancer - Mus musculus (house mouse)	GO:0000165: MAPK cascade; GO:0000792: heterochromatin; GO:0001558: regulation of cell growth; GO:0001649: osteoblast differentiation; GO:0001933: negative regulation of protein phosphorylation; GO:0001968: fibronectin binding; GO:0001968: fibronectin binding; GO:0005520: insulin-like growth factor binding; GO:0005576: extracellular region; GO:0005615: extracellular space; GO:0005615: extracellula…
ENSMUSG00000028041	Adam15	237	242	283	1.0499	1.1269	1.2192	1.47918	4.01099e-06	0.00014245	up	3	89245849	89257303	-	protein_coding	a disintegrin and metallopeptidase domain 15 (metargidin) [Source:MGI Symbol%3BAcc:MGI:1333882]	K06836: ADAM15; disintegrin and metalloproteinase domain-containing protein 15 [EC:3.4.24.-]		GO:0001525: angiogenesis; GO:0001953: negative regulation of cell-matrix adhesion; GO:0002418: immune response to tumor cell; GO:0004222: metalloendopeptidase activity; GO:0005178: integrin binding; GO:0005178: integrin binding; GO:0005515: protein binding; GO:0005615: extracellular space; GO:0005615: extracellular space; GO:0005929: cilium; GO:0006508: proteolysis; GO:0007155: cell adhesion; GO:…
ENSMUSG00000022853	Ehhadh	18490	14725	13509	168.856	141.347	119.969	-1.68468	4.05896e-06	0.000143823	down	16	21580037	21606557	-	protein_coding	enoyl-Coenzyme A%2C hydratase/3-hydroxyacyl Coenzyme A dehydrogenase [Source:MGI Symbol%3BAcc:MGI:1277964]	K07514: EHHADH; enoyl-CoA hydratase / 3-hydroxyacyl-CoA dehydrogenase / 3,2-trans-enoyl-CoA isomerase [EC:4.2.1.17 1.1.1.35 5.3.3.8]	mmu00071: Fatty acid degradation - Mus musculus (house mouse); mmu00280: Valine, leucine and isoleucine degradation - Mus musculus (house mouse); mmu00310: Lysine degradation - Mus musculus (house mouse); mmu00380: Tryptophan metabolism - Mus musculus (house mouse); mmu00410: beta-Alanine metabolism - Mus musculus (house mouse); mmu00640: Propanoate metabolism - Mus musculus (house mouse); mmu006…	GO:0003824: catalytic activity; GO:0003857: 3-hydroxyacyl-CoA dehydrogenase activity; GO:0003857: 3-hydroxyacyl-CoA dehydrogenase activity; GO:0003857: 3-hydroxyacyl-CoA dehydrogenase activity; GO:0004165: delta(3)-delta(2)-enoyl-CoA isomerase activity; GO:0004300: enoyl-CoA hydratase activity; GO:0005739: mitochondrion; GO:0005777: peroxisome; GO:0005777: peroxisome; GO:0005777: peroxisome; GO:0…
ENSMUSG00000112796	Gm40770	164	165	178	1.8193	1.924	1.9202	1.80942	4.14121e-06	0.000146402	up	10	117236621	117249836	-	lncRNA	predicted gene%2C 40770 [Source:MGI Symbol%3BAcc:MGI:5623655]
ENSMUSG00000042216	Sgsm1	173	201	213	0.6308	0.7704	0.7553	1.58015	4.1752e-06	0.000147266	up	5	113391086	113458652	-	protein_coding	small G protein signaling modulator 1 [Source:MGI Symbol%3BAcc:MGI:107320]	K21847: SGSM1, RUTBC2; small G protein signaling modulator 1		GO:0005096: GTPase activator activity; GO:0005096: GTPase activator activity; GO:0005515: protein binding; GO:0005737: cytoplasm; GO:0005794: Golgi apparatus; GO:0005829: cytosol; GO:0016020: membrane; GO:0030659: cytoplasmic vesicle membrane; GO:0030659: cytoplasmic vesicle membrane; GO:0031267: small GTPase binding; GO:0031267: small GTPase binding; GO:0031410: cytoplasmic vesicle; GO:0045944: …
ENSMUSG00000012017	Scarf2	341	325	374	2.4181	2.4225	2.5791	1.06383	4.19792e-06	0.00014773	up	16	17615146	17626157	+	protein_coding	scavenger receptor class F%2C member 2 [Source:MGI Symbol%3BAcc:MGI:1858430]	K24319: SCARF2; scavenger receptor class F member 2		GO:0005044: scavenger receptor activity; GO:0007155: cell adhesion; GO:0007157: heterophilic cell-cell adhesion via plasma membrane cell adhesion molecules; GO:0016020: membrane; GO:0016021: integral component of membrane
ENSMUSG00000026839	Upp2	9656	8282	8762	33.8704	30.5359	29.8877	1.93724	4.32016e-06	0.000151687	up	2	58457310	58682983	+	protein_coding	uridine phosphorylase 2 [Source:MGI Symbol%3BAcc:MGI:1923904]	K00757: udp, UPP; uridine phosphorylase [EC:2.4.2.3]	mmu00240: Pyrimidine metabolism - Mus musculus (house mouse); mmu00983: Drug metabolism - other enzymes - Mus musculus (house mouse); mmu01100: Metabolic pathways - Mus musculus (house mouse); mmu01232: Nucleotide metabolism - Mus musculus (house mouse)	GO:0003824: catalytic activity; GO:0004850: uridine phosphorylase activity; GO:0004850: uridine phosphorylase activity; GO:0004850: uridine phosphorylase activity; GO:0004850: uridine phosphorylase activity; GO:0005737: cytoplasm; GO:0005829: cytosol; GO:0005829: cytosol; GO:0006218: uridine catabolic process; GO:0006218: uridine catabolic process; GO:0006218: uridine catabolic process; GO:000624…
ENSMUSG00000089715	Cbx6	253	271	278	0.6492	0.7309	0.6937	1.03417	4.33207e-06	0.00015176	up	15	79708097	79718889	-	protein_coding	chromobox 6 [Source:MGI Symbol%3BAcc:MGI:3512628]	K11453: CBX6; chromobox protein 6		GO:0000122: negative regulation of transcription by RNA polymerase II; GO:0000792: heterochromatin; GO:0003727: single-stranded RNA binding; GO:0005634: nucleus; GO:0005634: nucleus; GO:0005694: chromosome; GO:0006325: chromatin organization; GO:0031519: PcG protein complex
ENSMUSG00000024909	Efemp2	212	242	233	1.5236	1.8281	1.6284	1.10873	4.40453e-06	0.000153949	up	19	5523982	5532545	+	protein_coding	epidermal growth factor-containing fibulin-like extracellular matrix protein 2 [Source:MGI Symbol%3BAcc:MGI:1891209]	K19866: EFEMP2; EGF-containing fibulin-like extracellular matrix protein 2		GO:0001527: microfibril; GO:0005509: calcium ion binding; GO:0005515: protein binding; GO:0005576: extracellular region; GO:0005604: basement membrane; GO:0005615: extracellular space; GO:0008201: heparin binding; GO:0030023: extracellular matrix constituent conferring elasticity; GO:0031012: extracellular matrix; GO:0031012: extracellular matrix; GO:0031012: extracellular matrix; GO:0035904: aor…
ENSMUSG00000047617	Paxx	767	820	1063	10.1066	11.3573	13.621	1.40575	4.53937e-06	0.000158304	up	2	25345153	25351106	-	protein_coding	non-homologous end joining factor [Source:MGI Symbol%3BAcc:MGI:2442831]	K25772: PAXX; protein PAXX		GO:0005634: nucleus; GO:0005634: nucleus; GO:0005654: nucleoplasm; GO:0005694: chromosome; GO:0006281: DNA repair; GO:0006303: double-strand break repair via nonhomologous end joining; GO:0006303: double-strand break repair via nonhomologous end joining; GO:0006303: double-strand break repair via nonhomologous end joining; GO:0006974: cellular response to DNA damage stimulus; GO:0035861: site of …
ENSMUSG00000040690	Col16a1	206	180	155	0.8308	0.7631	0.6079	1.29974	4.76564e-06	0.000165821	up	4	129941633	129993076	+	protein_coding	collagen%2C type XVI%2C alpha 1 [Source:MGI Symbol%3BAcc:MGI:1095396]	K24339: COL16A; collagen type XVI alpha	mmu04974: Protein digestion and absorption - Mus musculus (house mouse)	GO:0005178: integrin binding; GO:0005201: extracellular matrix structural constituent; GO:0005576: extracellular region; GO:0005581: collagen trimer; GO:0005588: collagen type V trimer; GO:0005615: extracellular space; GO:0007155: cell adhesion; GO:0030020: extracellular matrix structural constituent conferring tensile strength; GO:0030198: extracellular matrix organization; GO:0031012: extracell…
ENSMUSG00000038172	Ttc39b	662	478	494	1.767	1.3411	1.2823	-0.85668	4.83596e-06	0.000167889	false	4	83138537	83242492	-	protein_coding	tetratricopeptide repeat domain 39B [Source:MGI Symbol%3BAcc:MGI:1917113]	K24943: TTC39; tetratricopeptide repeat protein 39		GO:0003674: molecular_function; GO:0005575: cellular_component; GO:0006629: lipid metabolic process; GO:0010874: regulation of cholesterol efflux; GO:0010874: regulation of cholesterol efflux; GO:0010887: negative regulation of cholesterol storage; GO:0010887: negative regulation of cholesterol storage; GO:0042632: cholesterol homeostasis; GO:0042632: cholesterol homeostasis; GO:0090181: regulati…
ENSMUSG00000020592	Sdc1	7447	7741	6821	53.2244	58.1539	47.4072	-0.81145	4.88294e-06	0.00016914	false	12	8821323	8843715	+	protein_coding	syndecan 1 [Source:MGI Symbol%3BAcc:MGI:1349162]	K06257: SDC1, CD138; syndecan 1	mmu04512: ECM-receptor interaction - Mus musculus (house mouse); mmu04514: Cell adhesion molecules - Mus musculus (house mouse); mmu05144: Malaria - Mus musculus (house mouse); mmu05205: Proteoglycans in cancer - Mus musculus (house mouse); mmu05418: Fluid shear stress and atherosclerosis - Mus musculus (house mouse)	GO:0005515: protein binding; GO:0005576: extracellular region; GO:0005576: extracellular region; GO:0005796: Golgi lumen; GO:0005886: plasma membrane; GO:0006898: receptor-mediated endocytosis; GO:0006954: inflammatory response; GO:0008022: protein C-terminus binding; GO:0009897: external side of plasma membrane; GO:0009986: cell surface; GO:0009986: cell surface; GO:0009986: cell surface; GO:001…
ENSMUSG00000028051	Hcn3	307	383	390	2.0119	2.6383	2.4855	1.98028	4.99838e-06	0.000172752	up	3	89053381	89067503	-	protein_coding	hyperpolarization-activated%2C cyclic nucleotide-gated K+ 3 [Source:MGI Symbol%3BAcc:MGI:1298211]	K04956: HCN3; hyperpolarization activated cyclic nucleotide-gated potassium channel 3	mmu04929: GnRH secretion - Mus musculus (house mouse)	GO:0000166: nucleotide binding; GO:0003254: regulation of membrane depolarization; GO:0003254: regulation of membrane depolarization; GO:0005216: ion channel activity; GO:0005244: voltage-gated ion channel activity; GO:0005248: voltage-gated sodium channel activity; GO:0005249: voltage-gated potassium channel activity; GO:0005249: voltage-gated potassium channel activity; GO:0005249: voltage-gate…
ENSMUSG00000030867	Plk1	81	247	79	1.0028	3.2141	0.9511	2.52931	5.01575e-06	0.000172965	up	7	121758662	121769096	+	protein_coding	polo like kinase 1 [Source:MGI Symbol%3BAcc:MGI:97621]	K06631: PLK1; polo-like kinase 1 [EC:2.7.11.21]	mmu04068: FoxO signaling pathway - Mus musculus (house mouse); mmu04110: Cell cycle - Mus musculus (house mouse); mmu04114: Oocyte meiosis - Mus musculus (house mouse); mmu04914: Progesterone-mediated oocyte maturation - Mus musculus (house mouse)	GO:0000070: mitotic sister chromatid segregation; GO:0000086: G2/M transition of mitotic cell cycle; GO:0000122: negative regulation of transcription by RNA polymerase II; GO:0000132: establishment of mitotic spindle orientation; GO:0000166: nucleotide binding; GO:0000278: mitotic cell cycle; GO:0000278: mitotic cell cycle; GO:0000281: mitotic cytokinesis; GO:0000287: magnesium ion binding; GO:00…
ENSMUSG00000034881	Tbxa2r	101	97	114	1.4328	1.4464	1.5727	2.21772	5.06251e-06	0.000173416	up	10	81164565	81171006	+	protein_coding	thromboxane A2 receptor [Source:MGI Symbol%3BAcc:MGI:98496]	K04264: TBXA2R; thromboxane A2 receptor	mmu04020: Calcium signaling pathway - Mus musculus (house mouse); mmu04080: Neuroactive ligand-receptor interaction - Mus musculus (house mouse); mmu04611: Platelet activation - Mus musculus (house mouse)	GO:0001669: acrosomal vesicle; GO:0004930: G protein-coupled receptor activity; GO:0004960: thromboxane receptor activity; GO:0004960: thromboxane receptor activity; GO:0004961: thromboxane A2 receptor activity; GO:0005886: plasma membrane; GO:0005886: plasma membrane; GO:0006939: smooth muscle contraction; GO:0006954: inflammatory response; GO:0006954: inflammatory response; GO:0007165: signal t…
ENSMUSG00000051586	Mical3	647	666	634	0.7645	0.8272	0.7285	-0.72872	5.0578e-06	0.000173416	false	6	120908668	121107959	-	protein_coding	microtubule associated monooxygenase%2C calponin and LIM domain containing 3 [Source:MGI Symbol%3BAcc:MGI:2442733]	K19947: MICAL; F-actin monooxygenase [EC:1.14.13.225]		GO:0003779: actin binding; GO:0004497: monooxygenase activity; GO:0005634: nucleus; GO:0005654: nucleoplasm; GO:0005737: cytoplasm; GO:0005829: cytosol; GO:0005856: cytoskeleton; GO:0005886: plasma membrane; GO:0006887: exocytosis; GO:0007010: cytoskeleton organization; GO:0007049: cell cycle; GO:0016491: oxidoreductase activity; GO:0016709: oxidoreductase activity, acting on paired donors, with …
ENSMUSG00000074115	Saa1	933	2981	1293	10.2499	34.4234	13.8135	-6.65615	5.04451e-06	0.000173416	down	7	46389921	46392404	-	protein_coding	serum amyloid A 1 [Source:MGI Symbol%3BAcc:MGI:98221]	K17310: SAA; serum amyloid A protein		GO:0005515: protein binding; GO:0005576: extracellular region; GO:0005615: extracellular space; GO:0006953: acute-phase response; GO:0008201: heparin binding; GO:0008203: cholesterol metabolic process; GO:0009617: response to bacterium; GO:0034364: high-density lipoprotein particle
ENSMUSG00000019726	Lyst	666	703	566	1.0385	1.1522	0.8582	-0.80783	5.21929e-06	0.000178391	false	13	13764982	13953388	+	protein_coding	lysosomal trafficking regulator [Source:MGI Symbol%3BAcc:MGI:107448]	K22937: LYST, CHS1; lysosomal-trafficking regulator		GO:0002446: neutrophil mediated immunity; GO:0002456: T cell mediated immunity; GO:0005737: cytoplasm; GO:0005829: cytosol; GO:0005829: cytosol; GO:0006644: phospholipid metabolic process; GO:0006909: phagocytosis; GO:0007017: microtubule-based process; GO:0007040: lysosome organization; GO:0007596: blood coagulation; GO:0008104: protein localization; GO:0009410: response to xenobiotic stimulus; …
ENSMUSG00000018459	Slc13a3	375	358	380	1.9576	1.9644	1.929	-1.90755	5.31465e-06	0.000181249	down	2	165246948	165315150	-	protein_coding	solute carrier family 13 (sodium-dependent dicarboxylate transporter)%2C member 3 [Source:MGI Symbol%3BAcc:MGI:2149635]	K14445: SLC13A2_3_5; solute carrier family 13 (sodium-dependent dicarboxylate transporter), member 2/3/5		GO:0005310: dicarboxylic acid transmembrane transporter activity; GO:0005343: organic acid:sodium symporter activity; GO:0005886: plasma membrane; GO:0006811: ion transport; GO:0006814: sodium ion transport; GO:0006835: dicarboxylic acid transport; GO:0006835: dicarboxylic acid transport; GO:0015137: citrate transmembrane transporter activity; GO:0015137: citrate transmembrane transporter activit…
ENSMUSG00000021400	Wrnip1	1701	1556	1599	10.5772	10.1701	9.669	-0.74957	5.36151e-06	0.000182445	false	13	32986021	33006592	+	protein_coding	Werner helicase interacting protein 1 [Source:MGI Symbol%3BAcc:MGI:1926153]	K07478: ycaJ; putative ATPase		GO:0000166: nucleotide binding; GO:0000731: DNA synthesis involved in DNA repair; GO:0000781: chromosome, telomeric region; GO:0002376: immune system process; GO:0003677: DNA binding; GO:0005515: protein binding; GO:0005524: ATP binding; GO:0005634: nucleus; GO:0005634: nucleus; GO:0005634: nucleus; GO:0005737: cytoplasm; GO:0006260: DNA replication; GO:0006261: DNA-templated DNA replication; GO:…
ENSMUSG00000038541	Srd5a2	95	117	86	1.6113	2.0859	1.4185	1.65213	5.49827e-06	0.000186688	up	17	74323950	74354911	-	protein_coding	steroid 5 alpha-reductase 2 [Source:MGI Symbol%3BAcc:MGI:2150380]	K12344: SRD5A2; 3-oxo-5-alpha-steroid 4-dehydrogenase 2 [EC:1.3.1.22]	mmu00140: Steroid hormone biosynthesis - Mus musculus (house mouse); mmu01100: Metabolic pathways - Mus musculus (house mouse); mmu05215: Prostate cancer - Mus musculus (house mouse)	GO:0003865: 3-oxo-5-alpha-steroid 4-dehydrogenase activity; GO:0003865: 3-oxo-5-alpha-steroid 4-dehydrogenase activity; GO:0003865: 3-oxo-5-alpha-steroid 4-dehydrogenase activity; GO:0005737: cytoplasm; GO:0005783: endoplasmic reticulum; GO:0006629: lipid metabolic process; GO:0006694: steroid biosynthetic process; GO:0006694: steroid biosynthetic process; GO:0006694: steroid biosynthetic process…
ENSMUSG00000022723	Crybg3	334	342	322	0.7153	0.7699	0.6706	-0.79109	5.58388e-06	0.000189178	false	16	59311138	59421342	-	protein_coding	beta-gamma crystallin domain containing 3 [Source:MGI Symbol%3BAcc:MGI:2676311]			GO:0002088: lens development in camera-type eye; GO:0005212: structural constituent of eye lens; GO:0007601: visual perception; GO:0030246: carbohydrate binding; GO:0032991: protein-containing complex; GO:0051018: protein kinase A binding
ENSMUSG00000034158	Lrrc58	1534	1237	1211	4.8536	4.114	3.7261	-0.77551	5.61407e-06	0.000189785	false	16	37688751	37709220	+	protein_coding	leucine rich repeat containing 58 [Source:MGI Symbol%3BAcc:MGI:2443542]			GO:0003674: molecular_function; GO:0005575: cellular_component
ENSMUSG00000057913	Gm10032	2	7	4	0.0242	0.0889	0.047	-3.64001	5.66485e-06	0.000191083	down	14	67021929	67031207	+	lncRNA	predicted gene 10032 [Source:MGI Symbol%3BAcc:MGI:3642901]
ENSMUSG00000047767	Atg16l2	1525	1703	1726	4.9021	5.7541	5.3953	1.14697	5.72849e-06	0.000192809	up	7	100912241	100951458	-	protein_coding	autophagy related 16-like 2 (S. cerevisiae) [Source:MGI Symbol%3BAcc:MGI:1920933]	K20868: ATG16L2; autophagy-related protein 16-2	mmu04140: Autophagy - animal - Mus musculus (house mouse)	GO:0000045: autophagosome assembly; GO:0000045: autophagosome assembly; GO:0000421: autophagosome membrane; GO:0005515: protein binding; GO:0005654: nucleoplasm; GO:0005737: cytoplasm; GO:0005829: cytosol; GO:0006497: protein lipidation; GO:0015031: protein transport; GO:0016236: macroautophagy; GO:0034045: phagophore assembly site membrane; GO:0034274: Atg12-Atg5-Atg16 complex; GO:0034274: Atg12…
ENSMUSG00000038370	Pcp4l1	50	25	74	0.8631	0.4536	1.2422	-1.81031	5.79771e-06	0.000194715	down	1	171000831	171023837	-	protein_coding	Purkinje cell protein 4-like 1 [Source:MGI Symbol%3BAcc:MGI:1913675]			GO:0003674: molecular_function; GO:0005575: cellular_component; GO:0008150: biological_process
ENSMUSG00000001555	Fkbp10	86	79	95	0.7977	0.7702	0.8569	1.78913	5.90214e-06	0.000197792	up	11	100306523	100315650	+	protein_coding	FK506 binding protein 10 [Source:MGI Symbol%3BAcc:MGI:104769]	K09575: FKBP9_10; FK506-binding protein 9/10 [EC:5.2.1.8]		GO:0001701: in utero embryonic development; GO:0003755: peptidyl-prolyl cis-trans isomerase activity; GO:0003755: peptidyl-prolyl cis-trans isomerase activity; GO:0005509: calcium ion binding; GO:0005528: FK506 binding; GO:0005758: mitochondrial intermembrane space; GO:0005783: endoplasmic reticulum; GO:0005783: endoplasmic reticulum; GO:0005783: endoplasmic reticulum; GO:0006457: protein folding…
ENSMUSG00000024672	Ms4a7	93	86	64	0.5686	0.5526	0.3805	1.8313	5.96067e-06	0.000199321	up	19	11298403	11313510	-	protein_coding	membrane-spanning 4-domains%2C subfamily A%2C member 7 [Source:MGI Symbol%3BAcc:MGI:1918846]	K22191: MS4A5_6_7; membrane-spanning 4-domains subfamily A member 5/6/7		GO:0003674: molecular_function; GO:0005802: trans-Golgi network; GO:0005802: trans-Golgi network; GO:0005886: plasma membrane; GO:0007166: cell surface receptor signaling pathway
ENSMUSG00000026623	Lpgat1	4577	3827	3361	16.3733	14.3902	11.6921	-1.17794	6.00027e-06	0.000200212	down	1	191449946	191516367	+	protein_coding	lysophosphatidylglycerol acyltransferase 1 [Source:MGI Symbol%3BAcc:MGI:2446186]	K13514: LPGAT1; lysophosphatidylglycerol acyltransferase 1 [EC:2.3.1.-]	mmu00564: Glycerophospholipid metabolism - Mus musculus (house mouse)	GO:0003846: 2-acylglycerol O-acyltransferase activity; GO:0005737: cytoplasm; GO:0005783: endoplasmic reticulum; GO:0005789: endoplasmic reticulum membrane; GO:0006629: lipid metabolic process; GO:0008654: phospholipid biosynthetic process; GO:0012505: endomembrane system; GO:0016020: membrane; GO:0016021: integral component of membrane; GO:0016740: transferase activity; GO:0016746: acyltransfera…
ENSMUSG00000039765	Cc2d2a	182	251	185	0.7277	1.0548	0.7193	1.57495	6.06986e-06	0.000202097	up	5	43819688	43898314	+	protein_coding	coiled-coil and C2 domain containing 2A [Source:MGI Symbol%3BAcc:MGI:1924487]	K19352: CC2D2A; coiled-coil and C2 domain-containing protein 2A		GO:0001822: kidney development; GO:0001843: neural tube closure; GO:0005515: protein binding; GO:0005737: cytoplasm; GO:0005856: cytoskeleton; GO:0005929: cilium; GO:0007224: smoothened signaling pathway; GO:0007368: determination of left/right symmetry; GO:0007507: heart development; GO:0030030: cell projection organization; GO:0035082: axoneme assembly; GO:0035869: ciliary transition zone; GO:0…
ENSMUSG00000032363	Adamts7	456	670	519	1.9761	3.0519	2.1871	1.31511	6.21451e-06	0.000206469	up	9	90045122	90090124	+	protein_coding	a disintegrin-like and metallopeptidase (reprolysin type) with thrombospondin type 1 motif%2C 7 [Source:MGI Symbol%3BAcc:MGI:1347346]	K08622: ADAMTS7; a disintegrin and metalloproteinase with thrombospondin motifs 7 [EC:3.4.24.-]		GO:0001503: ossification; GO:0002062: chondrocyte differentiation; GO:0004222: metalloendopeptidase activity; GO:0004222: metalloendopeptidase activity; GO:0005576: extracellular region; GO:0006029: proteoglycan metabolic process; GO:0006508: proteolysis; GO:0008233: peptidase activity; GO:0008237: metallopeptidase activity; GO:0009986: cell surface; GO:0016787: hydrolase activity; GO:0030198: ex…
ENSMUSG00000036825	Ssx2ip	207	210	159	1.3417	1.4307	1.0022	-1.01443	6.27438e-06	0.000208011	down	3	146110397	146145899	+	protein_coding	synovial sarcoma%2C X 2 interacting protein [Source:MGI Symbol%3BAcc:MGI:2139150]	K06085: SSX2IP, ADIP; synovial sarcoma, X breakpoint 2 interacting protein	mmu04520: Adherens junction - Mus musculus (house mouse)	GO:0005515: protein binding; GO:0005634: nucleus; GO:0005737: cytoplasm; GO:0005856: cytoskeleton; GO:0005912: adherens junction; GO:0007098: centrosome cycle; GO:0007155: cell adhesion; GO:0019904: protein domain specific binding; GO:0030030: cell projection organization; GO:0030054: cell junction; GO:0031252: cell leading edge; GO:0032991: protein-containing complex; GO:0034451: centriolar sate…
ENSMUSG00000041329	Atp1b2	60	50	59	0.3999	0.3502	0.3824	2.22219	6.30028e-06	0.000208422	up	11	69490562	69496768	-	protein_coding	ATPase%2C Na+/K+ transporting%2C beta 2 polypeptide [Source:MGI Symbol%3BAcc:MGI:88109]	K01540: ATP1B, CD298; sodium/potassium-transporting ATPase subunit beta	mmu04022: cGMP-PKG signaling pathway - Mus musculus (house mouse); mmu04024: cAMP signaling pathway - Mus musculus (house mouse); mmu04260: Cardiac muscle contraction - Mus musculus (house mouse); mmu04261: Adrenergic signaling in cardiomyocytes - Mus musculus (house mouse); mmu04911: Insulin secretion - Mus musculus (house mouse); mmu04918: Thyroid hormone synthesis - Mus musculus (house mouse);…	GO:0001671: ATPase activator activity; GO:0001671: ATPase activator activity; GO:0001895: retina homeostasis; GO:0001917: photoreceptor inner segment; GO:0005391: P-type sodium:potassium-exchanging transporter activity; GO:0005737: cytoplasm; GO:0005886: plasma membrane; GO:0005890: sodium:potassium-exchanging ATPase complex; GO:0005890: sodium:potassium-exchanging ATPase complex; GO:0006811: ion…
ENSMUSG00000028003	Lrat	552	532	345	2.8083	2.8449	1.7068	1.21642	6.36478e-06	0.000210106	up	3	82799886	82811280	-	protein_coding	lecithin-retinol acyltransferase (phosphatidylcholine-retinol-O-acyltransferase) [Source:MGI Symbol%3BAcc:MGI:1891259]	K00678: LRAT; phosphatidylcholine-retinol O-acyltransferase [EC:2.3.1.135]	mmu00830: Retinol metabolism - Mus musculus (house mouse); mmu01100: Metabolic pathways - Mus musculus (house mouse); mmu04977: Vitamin digestion and absorption - Mus musculus (house mouse)	GO:0001972: retinoic acid binding; GO:0005737: cytoplasm; GO:0005768: endosome; GO:0005771: multivesicular body; GO:0005783: endoplasmic reticulum; GO:0005791: rough endoplasmic reticulum; GO:0005791: rough endoplasmic reticulum; GO:0006629: lipid metabolic process; GO:0006653: 1,2-diacyl-sn-glycero-3-phosphocholine metabolic process; GO:0006776: vitamin A metabolic process; GO:0006776: vitamin A…
ENSMUSG00000029177	Cenpa	296	452	252	1.3751	2.2072	1.1384	1.44603	6.46033e-06	0.000212805	up	5	30824121	30832174	+	protein_coding	centromere protein A [Source:MGI Symbol%3BAcc:MGI:88375]	K11495: CENPA; histone H3-like centromeric protein A		GO:0000132: establishment of mitotic spindle orientation; GO:0000281: mitotic cytokinesis; GO:0000775: chromosome, centromeric region; GO:0000775: chromosome, centromeric region; GO:0000776: kinetochore; GO:0000779: condensed chromosome, centromeric region; GO:0000779: condensed chromosome, centromeric region; GO:0000786: nucleosome; GO:0000939: inner kinetochore; GO:0003677: DNA binding; GO:0005…
ENSMUSG00000024292	Cyp4f14	16218	15317	14702	182.517	181.188	160.897	1.26084	6.65533e-06	0.000218762	up	17	33124044	33136316	-	protein_coding	cytochrome P450%2C family 4%2C subfamily f%2C polypeptide 14 [Source:MGI Symbol%3BAcc:MGI:1927669]	K00490: CYP4F; cytochrome P450 family 4 subfamily F [EC:1.14.14.1]		GO:0004497: monooxygenase activity; GO:0005504: fatty acid binding; GO:0005506: iron ion binding; GO:0005737: cytoplasm; GO:0005783: endoplasmic reticulum; GO:0006690: icosanoid metabolic process; GO:0008391: arachidonic acid monooxygenase activity; GO:0008391: arachidonic acid monooxygenase activity; GO:0008392: arachidonic acid epoxygenase activity; GO:0016020: membrane; GO:0016324: apical plas…
ENSMUSG00000021198	Unc79	3	1	7	0.0057	0.002	0.013	-3.38061	6.7197e-06	0.000220409	down	12	102915118	103150324	+	protein_coding	unc-79 homolog [Source:MGI Symbol%3BAcc:MGI:2684729]	K24014: UNC79; protein unc-79		GO:0005515: protein binding; GO:0005886: plasma membrane; GO:0016020: membrane; GO:0016021: integral component of membrane; GO:0030534: adult behavior; GO:0035264: multicellular organism growth; GO:0048149: behavioral response to ethanol
ENSMUSG00000000876	Pxmp4	6404	4973	6520	55.9852	45.6975	55.4289	-0.88658	6.76957e-06	0.000221574	false	2	154427678	154445628	-	protein_coding	peroxisomal membrane protein 4 [Source:MGI Symbol%3BAcc:MGI:1891701]	K13350: PXMP4, PMP24; peroxisomal membrane protein 4	mmu04146: Peroxisome - Mus musculus (house mouse)	GO:0003674: molecular_function; GO:0005777: peroxisome; GO:0005778: peroxisomal membrane; GO:0005778: peroxisomal membrane; GO:0008150: biological_process; GO:0016020: membrane; GO:0016021: integral component of membrane
ENSMUSG00000063952	Brpf3	1316	1291	1340	4.1398	4.2688	4.0992	-0.72432	6.90275e-06	0.000225456	false	17	29020064	29058923	+	protein_coding	bromodomain and PHD finger containing%2C 3 [Source:MGI Symbol%3BAcc:MGI:2146836]	K11350: BRPF3; bromodomain and PHD finger-containing protein 3		GO:0000123: histone acetyltransferase complex; GO:0005634: nucleus; GO:0006325: chromatin organization; GO:0006357: regulation of transcription by RNA polymerase II; GO:0043966: histone H3 acetylation; GO:0044154: histone H3-K14 acetylation; GO:0045740: positive regulation of DNA replication; GO:0046872: metal ion binding; GO:0050793: regulation of developmental process; GO:0070776: MOZ/MORF hist…
ENSMUSG00000040498	Igsf23	54	68	73	0.6496	0.8598	0.854	2.07847	6.92053e-06	0.00022556	up	7	19671230	19684681	-	protein_coding	immunoglobulin superfamily%2C member 23 [Source:MGI Symbol%3BAcc:MGI:1917330]			GO:0003674: molecular_function; GO:0005575: cellular_component; GO:0008150: biological_process
ENSMUSG00000086152	Gm11454	59	79	73	0.3025	0.4258	0.364	2.238	6.94211e-06	0.000225787	up	2	162964526	162988273	+	lncRNA	predicted gene 11454 [Source:MGI Symbol%3BAcc:MGI:3650530]			GO:0003674: molecular_function; GO:0005575: cellular_component; GO:0008150: biological_process
ENSMUSG00000009376	Met	1522	1500	1093	5.3957	5.5896	3.7681	-0.86279	7.07295e-06	0.000228594	false	6	17463799	17573979	+	protein_coding	met proto-oncogene [Source:MGI Symbol%3BAcc:MGI:96969]	K05099: MET, HGFR; proto-oncogene tyrosine-protein kinase Met [EC:2.7.10.1]	mmu01521: EGFR tyrosine kinase inhibitor resistance - Mus musculus (house mouse); mmu04010: MAPK signaling pathway - Mus musculus (house mouse); mmu04014: Ras signaling pathway - Mus musculus (house mouse); mmu04015: Rap1 signaling pathway - Mus musculus (house mouse); mmu04020: Calcium signaling pathway - Mus musculus (house mouse); mmu04151: PI3K-Akt signaling pathway - Mus musculus (house mous…	GO:0000122: negative regulation of transcription by RNA polymerase II; GO:0000166: nucleotide binding; GO:0001764: neuron migration; GO:0001886: endothelial cell morphogenesis; GO:0001889: liver development; GO:0001889: liver development; GO:0001890: placenta development; GO:0004672: protein kinase activity; GO:0004713: protein tyrosine kinase activity; GO:0004714: transmembrane receptor protein …
ENSMUSG00000022912	Pros1	2065	1656	1342	13.7515	11.5916	8.6906	-0.9236	7.09334e-06	0.000228594	false	16	62674670	62749709	+	protein_coding	protein S (alpha) [Source:MGI Symbol%3BAcc:MGI:1095733]	K03908: PROS1; protein S	mmu04610: Complement and coagulation cascades - Mus musculus (house mouse)	GO:0005509: calcium ion binding; GO:0005576: extracellular region; GO:0005615: extracellular space; GO:0005615: extracellular space; GO:0005615: extracellular space; GO:0007596: blood coagulation; GO:0007599: hemostasis; GO:0030195: negative regulation of blood coagulation; GO:0032991: protein-containing complex; GO:0042730: fibrinolysis; GO:0044877: protein-containing complex binding; GO:0050766…
ENSMUSG00000028559	Osbpl9	3956	3663	3537	15.3719	14.961	13.3651	-0.6371	7.07889e-06	0.000228594	false	4	108918342	109059469	-	protein_coding	oxysterol binding protein-like 9 [Source:MGI Symbol%3BAcc:MGI:1923784]	K20465: OSBPL9_10_11, ORP9_10_11; oxysterol-binding protein-related protein 9/10/11		GO:0005768: endosome; GO:0005794: Golgi apparatus; GO:0005829: cytosol; GO:0005829: cytosol; GO:0006869: lipid transport; GO:0008289: lipid binding; GO:0015248: sterol transporter activity; GO:0016020: membrane; GO:0032934: sterol binding; GO:0043231: intracellular membrane-bounded organelle; GO:0043231: intracellular membrane-bounded organelle
ENSMUSG00000034422	Parp14	1783	1406	1499	5.2159	4.3233	4.2643	-0.92919	7.11719e-06	0.000228594	false	16	35653244	35691914	-	protein_coding	poly (ADP-ribose) polymerase family%2C member 14 [Source:MGI Symbol%3BAcc:MGI:1919489]	K15261: PARP10_14_15; poly [ADP-ribose] polymerase 10/14/15 [EC:2.4.2.30]		GO:0002376: immune system process; GO:0003714: transcription corepressor activity; GO:0003950: NAD+ ADP-ribosyltransferase activity; GO:0003950: NAD+ ADP-ribosyltransferase activity; GO:0005515: protein binding; GO:0005634: nucleus; GO:0005737: cytoplasm; GO:0005737: cytoplasm; GO:0005737: cytoplasm; GO:0005829: cytosol; GO:0005886: plasma membrane; GO:0006471: protein ADP-ribosylation; GO:001062…
ENSMUSG00000039703	Nploc4	3480	3062	2753	19.8361	18.3457	15.2598	-0.67803	7.09671e-06	0.000228594	false	11	120271196	120328534	-	protein_coding	NPL4 homolog%2C ubiquitin recognition factor [Source:MGI Symbol%3BAcc:MGI:2679787]	K14015: NPLOC4, NPL4; nuclear protein localization protein 4	mmu04141: Protein processing in endoplasmic reticulum - Mus musculus (house mouse)	GO:0005634: nucleus; GO:0005634: nucleus; GO:0005737: cytoplasm; GO:0005783: endoplasmic reticulum; GO:0005829: cytosol; GO:0006511: ubiquitin-dependent protein catabolic process; GO:0006511: ubiquitin-dependent protein catabolic process; GO:0007030: Golgi organization; GO:0030433: ubiquitin-dependent ERAD pathway; GO:0030970: retrograde protein transport, ER to cytosol; GO:0030970: retrograde pr…
ENSMUSG00000074151	Nlrc5	1024	900	983	3.2823	3.0323	3.0641	-1.0153	7.11027e-06	0.000228594	down	8	95160984	95253900	+	protein_coding	NLR family%2C CARD domain containing 5 [Source:MGI Symbol%3BAcc:MGI:3612191]	K22615: NLRC5, NOD4; NLR family CARD domain containing 5		GO:0000166: nucleotide binding; GO:0000978: RNA polymerase II cis-regulatory region sequence-specific DNA binding; GO:0002376: immune system process; GO:0005524: ATP binding; GO:0005634: nucleus; GO:0005634: nucleus; GO:0005634: nucleus; GO:0005737: cytoplasm; GO:0005813: centrosome; GO:0005829: cytosol; GO:0005829: cytosol; GO:0009617: response to bacterium; GO:0032088: negative regulation of NF…
ENSMUSG00000031441	Atp11a	555	789	506	1.3551	2.0249	1.2014	-2.12316	7.3661e-06	0.000236097	down	8	12807014	12918728	+	protein_coding	ATPase%2C class VI%2C type 11A [Source:MGI Symbol%3BAcc:MGI:1354735]	K01530: E7.6.2.1; phospholipid-translocating ATPase [EC:7.6.2.1]		GO:0000166: nucleotide binding; GO:0000287: magnesium ion binding; GO:0001701: in utero embryonic development; GO:0005524: ATP binding; GO:0005768: endosome; GO:0005783: endoplasmic reticulum; GO:0005783: endoplasmic reticulum; GO:0005794: Golgi apparatus; GO:0005802: trans-Golgi network; GO:0005886: plasma membrane; GO:0005886: plasma membrane; GO:0005887: integral component of plasma membrane; …
ENSMUSG00000039096	Rsad1	333	328	462	2.0645	2.1375	2.7854	-1.28346	7.45517e-06	0.000238457	down	11	94430624	94440081	-	protein_coding	radical S-adenosyl methionine domain containing 1 [Source:MGI Symbol%3BAcc:MGI:3039628]			GO:0003824: catalytic activity; GO:0004109: coproporphyrinogen oxidase activity; GO:0005737: cytoplasm; GO:0005739: mitochondrion; GO:0006779: porphyrin-containing compound biosynthetic process; GO:0020037: heme binding; GO:0046872: metal ion binding; GO:0051536: iron-sulfur cluster binding; GO:0051539: 4 iron, 4 sulfur cluster binding
ENSMUSG00000059995	Atxn7l3	1105	882	1041	7.2996	6.1243	6.6874	-0.75938	7.47385e-06	0.000238561	false	11	102180126	102187457	-	protein_coding	ataxin 7-like 3 [Source:MGI Symbol%3BAcc:MGI:3036270]	K11363: SGF11; SAGA-associated factor 11		GO:0000124: SAGA complex; GO:0000124: SAGA complex; GO:0000124: SAGA complex; GO:0003713: transcription coactivator activity; GO:0003713: transcription coactivator activity; GO:0005634: nucleus; GO:0006282: regulation of DNA repair; GO:0006325: chromatin organization; GO:0006357: regulation of transcription by RNA polymerase II; GO:0006357: regulation of transcription by RNA polymerase II; GO:001…
ENSMUSG00000026610	Esrrg	4	3	2	0.0175	0.0138	0.0085	-3.44532	7.50701e-06	0.000238633	down	1	187340988	187947082	+	protein_coding	estrogen-related receptor gamma [Source:MGI Symbol%3BAcc:MGI:1347056]	K08554: NR3B3, ESRRG; estrogen-related receptor gamma		GO:0000977: RNA polymerase II transcription regulatory region sequence-specific DNA binding; GO:0000978: RNA polymerase II cis-regulatory region sequence-specific DNA binding; GO:0001228: DNA-binding transcription activator activity, RNA polymerase II-specific; GO:0001228: DNA-binding transcription activator activity, RNA polymerase II-specific; GO:0003677: DNA binding; GO:0003700: DNA-binding tr…	ESR-like
ENSMUSG00000038967	Pdk2	4659	4500	5518	40.0991	40.7105	46.1838	0.73248	7.50345e-06	0.000238633	false	11	94917084	94932180	-	protein_coding	pyruvate dehydrogenase kinase%2C isoenzyme 2 [Source:MGI Symbol%3BAcc:MGI:1343087]	K00898: PDK2_3_4; pyruvate dehydrogenase kinase 2/3/4 [EC:2.7.11.2]	mmu05415: Diabetic cardiomyopathy - Mus musculus (house mouse)	GO:0000166: nucleotide binding; GO:0004672: protein kinase activity; GO:0004674: protein serine/threonine kinase activity; GO:0004740: pyruvate dehydrogenase (acetyl-transferring) kinase activity; GO:0004740: pyruvate dehydrogenase (acetyl-transferring) kinase activity; GO:0004740: pyruvate dehydrogenase (acetyl-transferring) kinase activity; GO:0005515: protein binding; GO:0005524: ATP binding; …
ENSMUSG00000005413	Hmox1	1039	929	925	16.1536	15.1818	13.985	-1.2168	7.56652e-06	0.000240031	down	8	75820249	75827217	+	protein_coding	heme oxygenase 1 [Source:MGI Symbol%3BAcc:MGI:96163]	K00510: HMOX1; heme oxygenase 1 [EC:1.14.14.18]	mmu00860: Porphyrin metabolism - Mus musculus (house mouse); mmu01100: Metabolic pathways - Mus musculus (house mouse); mmu04066: HIF-1 signaling pathway - Mus musculus (house mouse); mmu04216: Ferroptosis - Mus musculus (house mouse); mmu04978: Mineral absorption - Mus musculus (house mouse); mmu05200: Pathways in cancer - Mus musculus (house mouse); mmu05206: MicroRNAs in cancer - Mus musculus …	GO:0001525: angiogenesis; GO:0001666: response to hypoxia; GO:0002246: wound healing involved in inflammatory response; GO:0004392: heme oxygenase (decyclizing) activity; GO:0004392: heme oxygenase (decyclizing) activity; GO:0004630: phospholipase D activity; GO:0005198: structural molecule activity; GO:0005634: nucleus; GO:0005634: nucleus; GO:0005730: nucleolus; GO:0005783: endoplasmic reticulu…
ENSMUSG00000023972	Ptk7	73	48	45	0.3691	0.2551	0.2213	2.44762	7.60169e-06	0.000240653	up	17	46875397	46940430	-	protein_coding	PTK7 protein tyrosine kinase 7 [Source:MGI Symbol%3BAcc:MGI:1918711]	K05127: PTK7, CCK4; PTK7 protein tyrosine kinase 7 [EC:2.7.10.1]		GO:0001736: establishment of planar polarity; GO:0001822: kidney development; GO:0001843: neural tube closure; GO:0001843: neural tube closure; GO:0003281: ventricular septum development; GO:0003401: axis elongation; GO:0004672: protein kinase activity; GO:0005886: plasma membrane; GO:0005886: plasma membrane; GO:0005911: cell-cell junction; GO:0005911: cell-cell junction; GO:0005911: cell-cell j…
ENSMUSG00000004951	Hspb1	512	313	509	13.5192	8.6872	13.0697	-1.71579	7.69868e-06	0.000243225	down	5	135916773	135918417	+	protein_coding	heat shock protein 1 [Source:MGI Symbol%3BAcc:MGI:96240]	K04455: HSPB1; heat shock protein beta-1	mmu04010: MAPK signaling pathway - Mus musculus (house mouse); mmu04370: VEGF signaling pathway - Mus musculus (house mouse); mmu05146: Amoebiasis - Mus musculus (house mouse)	GO:0000502: proteasome complex; GO:0001533: cornified envelope; GO:0001932: regulation of protein phosphorylation; GO:0005080: protein kinase C binding; GO:0005622: intracellular anatomical structure; GO:0005634: nucleus; GO:0005634: nucleus; GO:0005634: nucleus; GO:0005737: cytoplasm; GO:0005737: cytoplasm; GO:0005737: cytoplasm; GO:0005856: cytoskeleton; GO:0005886: plasma membrane; GO:0005886:…
ENSMUSG00000020644	Id2	3294	3159	3575	36.7816	37.0773	38.8195	-1.02684	7.77626e-06	0.000245174	down	12	25143798	25147139	-	protein_coding	inhibitor of DNA binding 2 [Source:MGI Symbol%3BAcc:MGI:96397]	K17693: ID2; DNA-binding protein inhibitor ID2	mmu04350: TGF-beta signaling pathway - Mus musculus (house mouse); mmu04390: Hippo signaling pathway - Mus musculus (house mouse); mmu04550: Signaling pathways regulating pluripotency of stem cells - Mus musculus (house mouse); mmu05202: Transcriptional misregulation in cancer - Mus musculus (house mouse)	GO:0000122: negative regulation of transcription by RNA polymerase II; GO:0000122: negative regulation of transcription by RNA polymerase II; GO:0000122: negative regulation of transcription by RNA polymerase II; GO:0000122: negative regulation of transcription by RNA polymerase II; GO:0000785: chromatin; GO:0000791: euchromatin; GO:0001656: metanephros development; GO:0001779: natural killer cel…	bHLH
ENSMUSG00000067656	Slc22a27	72	39	65	0.9108	0.5186	0.7996	2.65636	7.8258e-06	0.000246234	up	19	7841753	7943392	-	protein_coding	solute carrier family 22%2C member 27 [Source:MGI Symbol%3BAcc:MGI:3042283]	K08206: SLC22A9S; MFS transporter, OCT family, solute carrier family 22 (organic anion/cation transporter), member 9/10/19/24/25		GO:0005886: plasma membrane; GO:0015347: sodium-independent organic anion transmembrane transporter activity; GO:0015636: short-chain fatty acid transmembrane transporter activity; GO:0015711: organic anion transport; GO:0016020: membrane; GO:0016021: integral component of membrane; GO:0016323: basolateral plasma membrane; GO:0022857: transmembrane transporter activity; GO:0055085: transmembrane …
ENSMUSG00000069919	Hba-a1	2999	1713	2624	100.545	60.3662	85.549	1.12527	7.8938e-06	0.000247868	up	11	32233511	32234465	+	protein_coding	hemoglobin alpha%2C adult chain 1 [Source:MGI Symbol%3BAcc:MGI:96015]	K13822: HBA; hemoglobin subunit alpha	mmu05143: African trypanosomiasis - Mus musculus (house mouse); mmu05144: Malaria - Mus musculus (house mouse)	GO:0001701: in utero embryonic development; GO:0004601: peroxidase activity; GO:0004601: peroxidase activity; GO:0005344: oxygen carrier activity; GO:0005615: extracellular space; GO:0005833: hemoglobin complex; GO:0005833: hemoglobin complex; GO:0009617: response to bacterium; GO:0010942: positive regulation of cell death; GO:0015671: oxygen transport; GO:0019825: oxygen binding; GO:0019825: oxy…
ENSMUSG00000050541	Adra1b	3438	4307	3500	27.6741	36.4413	27.3969	0.88985	8.05362e-06	0.000252374	false	11	43665433	43792037	-	protein_coding	adrenergic receptor%2C alpha 1b [Source:MGI Symbol%3BAcc:MGI:104774]	K04136: ADRA1B; adrenergic receptor alpha-1B	mmu04020: Calcium signaling pathway - Mus musculus (house mouse); mmu04022: cGMP-PKG signaling pathway - Mus musculus (house mouse); mmu04080: Neuroactive ligand-receptor interaction - Mus musculus (house mouse); mmu04261: Adrenergic signaling in cardiomyocytes - Mus musculus (house mouse); mmu04270: Vascular smooth muscle contraction - Mus musculus (house mouse); mmu04970: Salivary secretion - M…	GO:0001974: blood vessel remodeling; GO:0001975: response to amphetamine; GO:0001987: vasoconstriction of artery involved in baroreceptor response to lowering of systemic arterial blood pressure; GO:0001996: positive regulation of heart rate by epinephrine-norepinephrine; GO:0001996: positive regulation of heart rate by epinephrine-norepinephrine; GO:0001997: positive regulation of the force of h…
ENSMUSG00000030309	Caprin2	97	122	89	0.1868	0.2469	0.1666	1.63425	8.18592e-06	0.000255484	up	6	148743990	148797735	-	protein_coding	caprin family member 2 [Source:MGI Symbol%3BAcc:MGI:2448541]	K18744: CAPRIN2, EEG1; caprin-2		GO:0003723: RNA binding; GO:0005102: signaling receptor binding; GO:0005102: signaling receptor binding; GO:0005654: nucleoplasm; GO:0005737: cytoplasm; GO:0005737: cytoplasm; GO:0005739: mitochondrion; GO:0005813: centrosome; GO:0005829: cytosol; GO:0005886: plasma membrane; GO:0016020: membrane; GO:0017148: negative regulation of translation; GO:0030154: cell differentiation; GO:0030308: negati…
ENSMUSG00000040006	Ginm1	1054	923	989	9.5772	8.8156	8.739	-0.69876	8.16946e-06	0.000255484	false	10	7643711	7668588	-	protein_coding	glycoprotein integral membrane 1 [Source:MGI Symbol%3BAcc:MGI:2384905]			GO:0003674: molecular_function; GO:0008150: biological_process; GO:0016020: membrane; GO:0016021: integral component of membrane
ENSMUSG00000040415	Dtx3	422	390	545	4.4667	4.339	5.6096	1.29307	8.21328e-06	0.00025582	up	10	127026247	127031597	-	protein_coding	deltex 3%2C E3 ubiquitin ligase [Source:MGI Symbol%3BAcc:MGI:2135752]	K06058: DTX; deltex [EC:2.3.2.27]	mmu04330: Notch signaling pathway - Mus musculus (house mouse)	GO:0005515: protein binding; GO:0005654: nucleoplasm; GO:0005737: cytoplasm; GO:0007219: Notch signaling pathway; GO:0007219: Notch signaling pathway; GO:0007219: Notch signaling pathway; GO:0016567: protein ubiquitination; GO:0016740: transferase activity; GO:0046872: metal ion binding; GO:0061630: ubiquitin protein ligase activity
ENSMUSG00000020150	Gamt	5151	4786	6175	97.1102	94.8414	113.208	1.22316	8.26108e-06	0.000256792	up	10	80093985	80096846	-	protein_coding	guanidinoacetate methyltransferase [Source:MGI Symbol%3BAcc:MGI:1098221]	K00542: GAMT; guanidinoacetate N-methyltransferase [EC:2.1.1.2]	mmu00260: Glycine, serine and threonine metabolism - Mus musculus (house mouse); mmu00330: Arginine and proline metabolism - Mus musculus (house mouse); mmu01100: Metabolic pathways - Mus musculus (house mouse)	GO:0005634: nucleus; GO:0005737: cytoplasm; GO:0005829: cytosol; GO:0006601: creatine biosynthetic process; GO:0006601: creatine biosynthetic process; GO:0006601: creatine biosynthetic process; GO:0007283: spermatogenesis; GO:0008168: methyltransferase activity; GO:0008757: S-adenosylmethionine-dependent methyltransferase activity; GO:0008757: S-adenosylmethionine-dependent methyltransferase acti…
ENSMUSG00000001240	Ramp2	423	384	504	3.4885	3.3287	4.042	1.07831	8.38442e-06	0.000260102	up	11	101136854	101150372	+	protein_coding	receptor (calcitonin) activity modifying protein 2 [Source:MGI Symbol%3BAcc:MGI:1859650]	K08448: RAMP2; receptor activity modifying protein 2	mmu04270: Vascular smooth muscle contraction - Mus musculus (house mouse)	GO:0001525: angiogenesis; GO:0001525: angiogenesis; GO:0001570: vasculogenesis; GO:0001605: adrenomedullin receptor activity; GO:0002040: sprouting angiogenesis; GO:0005737: cytoplasm; GO:0005886: plasma membrane; GO:0006816: calcium ion transport; GO:0006816: calcium ion transport; GO:0006886: intracellular protein transport; GO:0007186: G protein-coupled receptor signaling pathway; GO:0007186: …
ENSMUSG00000032357	Tinag	19	31	21	0.2981	0.5113	0.3204	5.99609	8.45446e-06	0.000261749	up	9	76858975	76953076	-	protein_coding	tubulointerstitial nephritis antigen [Source:MGI Symbol%3BAcc:MGI:1349477]			GO:0005201: extracellular matrix structural constituent; GO:0005604: basement membrane; GO:0005615: extracellular space; GO:0005764: lysosome; GO:0007155: cell adhesion; GO:0062023: collagen-containing extracellular matrix
ENSMUSG00000105504	Gbp5	109	101	84	0.4471	0.4355	0.3351	-1.61337	8.65051e-06	0.000267283	down	3	142199739	142228105	+	protein_coding	guanylate binding protein 5 [Source:MGI Symbol%3BAcc:MGI:2429943]	K20898: GBP5; guanylate-binding protein 5	mmu04621: NOD-like receptor signaling pathway - Mus musculus (house mouse)	GO:0000166: nucleotide binding; GO:0002376: immune system process; GO:0003924: GTPase activity; GO:0005515: protein binding; GO:0005525: GTP binding; GO:0005737: cytoplasm; GO:0005794: Golgi apparatus; GO:0006954: inflammatory response; GO:0009617: response to bacterium; GO:0016020: membrane; GO:0016787: hydrolase activity; GO:0031410: cytoplasmic vesicle; GO:0031410: cytoplasmic vesicle; GO:0032…
ENSMUSG00000050947	Amigo1	230	209	246	1.1302	1.0795	1.1755	-0.88507	8.93509e-06	0.000275525	false	3	108093651	108099602	+	protein_coding	adhesion molecule with Ig like domain 1 [Source:MGI Symbol%3BAcc:MGI:2653612]	K22529: AMIGO; amphoterin-induced protein		GO:0005515: protein binding; GO:0005886: plasma membrane; GO:0005887: integral component of plasma membrane; GO:0007155: cell adhesion; GO:0007156: homophilic cell adhesion via plasma membrane adhesion molecules; GO:0007156: homophilic cell adhesion via plasma membrane adhesion molecules; GO:0007157: heterophilic cell-cell adhesion via plasma membrane cell adhesion molecules; GO:0007157: heteroph…
ENSMUSG00000051674	Dcun1d4	761	631	548	3.5676	3.1094	2.4983	-1.07709	9.07571e-06	0.000279304	down	5	73638343	73718137	+	protein_coding	DCN1%2C defective in cullin neddylation 1%2C domain containing 4 (S. cerevisiae) [Source:MGI Symbol%3BAcc:MGI:2140972]	K17824: DCUN1D4_5; DCN1-like protein 4/5		GO:0000151: ubiquitin ligase complex; GO:0005634: nucleus; GO:0031624: ubiquitin conjugating enzyme binding; GO:0032182: ubiquitin-like protein binding; GO:0045116: protein neddylation; GO:0051443: positive regulation of ubiquitin-protein transferase activity; GO:0097602: cullin family protein binding; GO:0097602: cullin family protein binding; GO:2000436: positive regulation of protein neddylati…
ENSMUSG00000027459	Fam110a	170	166	216	2.0969	2.1523	2.5909	1.33606	9.21062e-06	0.000282892	up	2	151811318	151822139	-	protein_coding	family with sequence similarity 110%2C member A [Source:MGI Symbol%3BAcc:MGI:1921097]			GO:0003674: molecular_function; GO:0005575: cellular_component; GO:0005737: cytoplasm; GO:0005856: cytoskeleton; GO:0008150: biological_process
ENSMUSG00000061313	Ddhd2	714	545	632	2.7223	2.1842	2.3433	-1.16159	9.23715e-06	0.000283144	down	8	26215373	26244624	-	protein_coding	DDHD domain containing 2 [Source:MGI Symbol%3BAcc:MGI:1919358]	K16545: DDHD2; phospholipase DDHD2 [EC:3.1.1.-]		GO:0000266: mitochondrial fission; GO:0004620: phospholipase activity; GO:0004806: triglyceride lipase activity; GO:0004806: triglyceride lipase activity; GO:0004806: triglyceride lipase activity; GO:0005737: cytoplasm; GO:0005794: Golgi apparatus; GO:0005829: cytosol; GO:0006629: lipid metabolic process; GO:0007626: locomotory behavior; GO:0008542: visual learning; GO:0016020: membrane; GO:00160…
ENSMUSG00000048787	Dcun1d3	305	272	288	1.0593	0.993	0.9727	-1.29577	9.32746e-06	0.000285346	down	7	119452019	119495521	-	protein_coding	DCN1%2C defective in cullin neddylation 1%2C domain containing 3 (S. cerevisiae) [Source:MGI Symbol%3BAcc:MGI:2679003]	K17823: DCUN1D3; DCN1-like protein 3		GO:0000151: ubiquitin ligase complex; GO:0005634: nucleus; GO:0005737: cytoplasm; GO:0005886: plasma membrane; GO:0010225: response to UV-C; GO:0010332: response to gamma radiation; GO:0010564: regulation of cell cycle process; GO:0016020: membrane; GO:0030308: negative regulation of cell growth; GO:0031624: ubiquitin conjugating enzyme binding; GO:0032182: ubiquitin-like protein binding; GO:0043…
ENSMUSG00000039145	Camk1d	4327	4778	3313	15.8604	18.4088	11.8091	0.88142	9.76028e-06	0.000297997	false	2	5298268	5719326	-	protein_coding	calcium/calmodulin-dependent protein kinase ID [Source:MGI Symbol%3BAcc:MGI:2442190]			GO:0000166: nucleotide binding; GO:0003824: catalytic activity; GO:0004672: protein kinase activity; GO:0004674: protein serine/threonine kinase activity; GO:0004683: calmodulin-dependent protein kinase activity; GO:0004683: calmodulin-dependent protein kinase activity; GO:0005516: calmodulin binding; GO:0005524: ATP binding; GO:0005622: intracellular anatomical structure; GO:0005634: nucleus; GO…
ENSMUSG00000038990	Cables2	1160	1135	1124	6.8695	7.065	6.4729	-0.61817	9.82029e-06	0.000299238	false	2	179900333	179915289	-	protein_coding	CDK5 and Abl enzyme substrate 2 [Source:MGI Symbol%3BAcc:MGI:2182335]			GO:0005515: protein binding; GO:0005575: cellular_component; GO:0007049: cell cycle; GO:0008150: biological_process; GO:0051301: cell division; GO:0051726: regulation of cell cycle
ENSMUSG00000002980	Bcam	196	228	151	1.6679	2.0395	1.2496	1.40877	9.92606e-06	0.000301866	up	7	19490056	19504941	-	protein_coding	basal cell adhesion molecule [Source:MGI Symbol%3BAcc:MGI:1929940]	K06578: LU, CD239; Lutheran blood group glycoprotein		GO:0005055: laminin receptor activity; GO:0005055: laminin receptor activity; GO:0005055: laminin receptor activity; GO:0005886: plasma membrane; GO:0005886: plasma membrane; GO:0005887: integral component of plasma membrane; GO:0007155: cell adhesion; GO:0007160: cell-matrix adhesion; GO:0008022: protein C-terminus binding; GO:0009986: cell surface; GO:0016020: membrane; GO:0016021: integral com…
ENSMUSG00000035279	Ssc5d	48	49	60	0.2847	0.3055	0.3461	2.56306	9.9942e-06	0.000303341	up	7	4928784	4947825	+	protein_coding	scavenger receptor cysteine rich family%2C 5 domains [Source:MGI Symbol%3BAcc:MGI:3606211]	K25740: SSC5D; soluble scavenger receptor cysteine-rich domain-containing protein SSC5D		GO:0001968: fibronectin binding; GO:0002376: immune system process; GO:0005044: scavenger receptor activity; GO:0005515: protein binding; GO:0005576: extracellular region; GO:0005576: extracellular region; GO:0005615: extracellular space; GO:0005615: extracellular space; GO:0005615: extracellular space; GO:0005737: cytoplasm; GO:0006952: defense response; GO:0006952: defense response; GO:0007275:…
ENSMUSG00000027965	Olfm3	83	122	51	0.4576	0.707	0.2734	2.46013	1.00528e-05	0.000303925	up	3	114697727	114919371	+	protein_coding	olfactomedin 3 [Source:MGI Symbol%3BAcc:MGI:2387329]	K25446: OLFM3; noelin-3		GO:0005515: protein binding; GO:0005576: extracellular region; GO:0005615: extracellular space; GO:0005615: extracellular space; GO:0005794: Golgi apparatus; GO:0007165: signal transduction; GO:0030054: cell junction; GO:0032281: AMPA glutamate receptor complex; GO:0042462: eye photoreceptor cell development; GO:0045202: synapse
ENSMUSG00000085990	Gm16731	93	82	158	1.8979	1.7589	3.1355	2.1959	1.00453e-05	0.000303925	up	4	46535901	46539883	+	lncRNA	predicted gene%2C 16731 [Source:MGI Symbol%3BAcc:MGI:4439655]
ENSMUSG00000055027	Smyd1	140	103	120	0.8384	0.6483	0.6988	-1.71365	1.01321e-05	0.000305723	down	6	71190924	71299217	-	protein_coding	SET and MYND domain containing 1 [Source:MGI Symbol%3BAcc:MGI:104790]	K11426: SMYD; [histone H3]-lysine4/36 N-trimethyltransferase SMYD [EC:2.1.1.354 2.1.1.357]	mmu00310: Lysine degradation - Mus musculus (house mouse); mmu01100: Metabolic pathways - Mus musculus (house mouse)	GO:0003677: DNA binding; GO:0003714: transcription corepressor activity; GO:0005515: protein binding; GO:0005634: nucleus; GO:0005634: nucleus; GO:0005737: cytoplasm; GO:0006338: chromatin remodeling; GO:0007507: heart development; GO:0008168: methyltransferase activity; GO:0010831: positive regulation of myotube differentiation; GO:0016740: transferase activity; GO:0018024: histone-lysine N-meth…
ENSMUSG00000030208	Emp1	198	119	112	0.9082	0.5737	0.4996	1.94494	1.02799e-05	0.000309579	up	6	135339543	135360171	+	protein_coding	epithelial membrane protein 1 [Source:MGI Symbol%3BAcc:MGI:107941]	K26255: EMP1; epithelial membrane protein 1	mmu04510: Focal adhesion - Mus musculus (house mouse)	GO:0005886: plasma membrane; GO:0005886: plasma membrane; GO:0008219: cell death; GO:0016020: membrane; GO:0016021: integral component of membrane; GO:0032060: bleb assembly
ENSMUSG00000032010	Usp2	159	119	160	0.8984	0.7068	0.8791	-1.04957	1.11149e-05	0.000334073	down	9	43978318	44006924	+	protein_coding	ubiquitin specific peptidase 2 [Source:MGI Symbol%3BAcc:MGI:1858178]	K11833: USP2; ubiquitin carboxyl-terminal hydrolase 2 [EC:3.4.19.12]		GO:0000122: negative regulation of transcription by RNA polymerase II; GO:0004843: cysteine-type deubiquitinase activity; GO:0005515: protein binding; GO:0005634: nucleus; GO:0005737: cytoplasm; GO:0005737: cytoplasm; GO:0005813: centrosome; GO:0006508: proteolysis; GO:0006511: ubiquitin-dependent protein catabolic process; GO:0007049: cell cycle; GO:0007517: muscle organ development; GO:0008233:…
ENSMUSG00000029070	Mxra8	592	465	469	5.523	4.56	4.255	0.91798	1.12402e-05	0.000337185	false	4	155924137	155928545	+	protein_coding	matrix-remodelling associated 8 [Source:MGI Symbol%3BAcc:MGI:1922011]	K24402: MXRA8; matrix remodeling-associated protein 8		GO:0003674: molecular_function; GO:0005634: nucleus; GO:0005737: cytoplasm; GO:0005886: plasma membrane; GO:0005923: bicellular tight junction; GO:0007155: cell adhesion; GO:0009986: cell surface; GO:0009986: cell surface; GO:0016020: membrane; GO:0016021: integral component of membrane; GO:0030054: cell junction; GO:0030154: cell differentiation; GO:0042995: cell projection; GO:0060857: establis…
ENSMUSG00000113063	Gm34667	406	406	369	4.8307	5.0776	4.2695	0.94462	1.12746e-05	0.000337559	false	12	109943803	109990307	-	lncRNA	predicted gene%2C 34667 [Source:MGI Symbol%3BAcc:MGI:5593826]
ENSMUSG00000038135	Crygn	65	79	91	2.2064	2.8187	3.0038	1.86755	1.15726e-05	0.000345813	up	5	24956001	24963006	-	protein_coding	crystallin%2C gamma N [Source:MGI Symbol%3BAcc:MGI:2449167]	K23483: CRYG; gamma-crystallin		GO:0002088: lens development in camera-type eye; GO:0005212: structural constituent of eye lens; GO:0005575: cellular_component; GO:0007601: visual perception
ENSMUSG00000031568	Rwdd4a	553	474	472	4.4912	4.0464	3.7277	-0.71424	1.17842e-05	0.000351146	false	8	47986699	48005990	+	protein_coding	RWD domain containing 4A [Source:MGI Symbol%3BAcc:MGI:2681000]			GO:0003674: molecular_function; GO:0005575: cellular_component; GO:0008150: biological_process
ENSMUSG00000109093	Gm39079	287	431	309	1.7259	2.7243	1.807	-1.00154	1.17965e-05	0.000351146	down	7	119206904	119242692	-	lncRNA	predicted gene%2C 39079 [Source:MGI Symbol%3BAcc:MGI:5621964]
ENSMUSG00000078921	Tgtp2	200	127	131	1.8532	1.2369	1.1804	-1.18376	1.18935e-05	0.000353352	down	11	48948021	48955033	-	protein_coding	T cell specific GTPase 2 [Source:MGI Symbol%3BAcc:MGI:3710083]			GO:0003924: GTPase activity; GO:0005789: endoplasmic reticulum membrane; GO:0006952: defense response; GO:0035458: cellular response to interferon-beta
ENSMUSG00000022863	Btg3	201	173	140	1.3632	1.2333	0.9233	-2.26016	1.1951e-05	0.000354123	down	16	78129525	78174080	-	protein_coding	BTG anti-proliferation factor 3 [Source:MGI Symbol%3BAcc:MGI:109532]	K14443: TOB; protein Tob/BTG	mmu03018: RNA degradation - Mus musculus (house mouse)	GO:0005515: protein binding; GO:0005634: nucleus; GO:0005737: cytoplasm; GO:0005737: cytoplasm; GO:0008285: negative regulation of cell population proliferation; GO:0045930: negative regulation of mitotic cell cycle; GO:0045930: negative regulation of mitotic cell cycle
ENSMUSG00000069833	Ahnak	688	656	574	0.9394	0.9415	0.7621	0.80621	1.19653e-05	0.000354123	false	19	8966648	9054278	+	protein_coding	AHNAK nucleoprotein (desmoyokin) [Source:MGI Symbol%3BAcc:MGI:1316648]	K23934: AHNAK; neuroblast differentiation-associated protein AHNAK	mmu05132: Salmonella infection - Mus musculus (house mouse)	GO:0005515: protein binding; GO:0005634: nucleus; GO:0005634: nucleus; GO:0005737: cytoplasm; GO:0005737: cytoplasm; GO:0005829: cytosol; GO:0005829: cytosol; GO:0005886: plasma membrane; GO:0005886: plasma membrane; GO:0005886: plasma membrane; GO:0005911: cell-cell junction; GO:0015629: actin cytoskeleton; GO:0015629: actin cytoskeleton; GO:0031982: vesicle; GO:0031982: vesicle; GO:0042383: sar…
ENSMUSG00000027870	Hao2	24	24	18	0.3189	0.3352	0.2326	5.88502	1.20404e-05	0.000355663	up	3	98781837	98800555	-	protein_coding	hydroxyacid oxidase 2 [Source:MGI Symbol%3BAcc:MGI:96012]	K11517: HAO; (S)-2-hydroxy-acid oxidase [EC:1.1.3.15]	mmu00630: Glyoxylate and dicarboxylate metabolism - Mus musculus (house mouse); mmu01100: Metabolic pathways - Mus musculus (house mouse); mmu01200: Carbon metabolism - Mus musculus (house mouse); mmu04146: Peroxisome - Mus musculus (house mouse)	GO:0003824: catalytic activity; GO:0003973: (S)-2-hydroxy-acid oxidase activity; GO:0005739: mitochondrion; GO:0005777: peroxisome; GO:0005782: peroxisomal matrix; GO:0006629: lipid metabolic process; GO:0006631: fatty acid metabolic process; GO:0010181: FMN binding; GO:0016491: oxidoreductase activity; GO:0018924: mandelate metabolic process; GO:0019395: fatty acid oxidation; GO:0042802: identic…
ENSMUSG00000025902	Sox17	146	138	153	0.8329	0.8275	0.8488	1.27262	1.21e-05	0.000356742	up	1	4561154	4567577	-	protein_coding	SRY (sex determining region Y)-box 17 [Source:MGI Symbol%3BAcc:MGI:107543]	K04495: SOX17; transcription factor SOX17 (SOX group F)	mmu04310: Wnt signaling pathway - Mus musculus (house mouse)	GO:0000976: transcription cis-regulatory region binding; GO:0000978: RNA polymerase II cis-regulatory region sequence-specific DNA binding; GO:0000981: DNA-binding transcription factor activity, RNA polymerase II-specific; GO:0000981: DNA-binding transcription factor activity, RNA polymerase II-specific; GO:0001228: DNA-binding transcription activator activity, RNA polymerase II-specific; GO:0001…	HMG
ENSMUSG00000027360	Hdc	742	574	861	3.1616	2.5708	3.5676	-1.0104	1.21329e-05	0.000357031	down	2	126435587	126461219	-	protein_coding	histidine decarboxylase [Source:MGI Symbol%3BAcc:MGI:96062]	K01590: hdc, HDC; histidine decarboxylase [EC:4.1.1.22]	mmu00340: Histidine metabolism - Mus musculus (house mouse); mmu01100: Metabolic pathways - Mus musculus (house mouse)	GO:0001692: histamine metabolic process; GO:0001694: histamine biosynthetic process; GO:0001694: histamine biosynthetic process; GO:0001694: histamine biosynthetic process; GO:0003824: catalytic activity; GO:0004398: histidine decarboxylase activity; GO:0004398: histidine decarboxylase activity; GO:0004398: histidine decarboxylase activity; GO:0004398: histidine decarboxylase activity; GO:0005737…
ENSMUSG00000037370	Enpp1	718	738	633	1.9057	2.0589	1.6338	-0.71219	1.21765e-05	0.000357632	false	10	24513812	24588057	-	protein_coding	ectonucleotide pyrophosphatase/phosphodiesterase 1 [Source:MGI Symbol%3BAcc:MGI:97370]	K01513: ENPP1_3, CD203; ectonucleotide pyrophosphatase/phosphodiesterase family member 1/3 [EC:3.1.4.1 3.6.1.9]	mmu00230: Purine metabolism - Mus musculus (house mouse); mmu00240: Pyrimidine metabolism - Mus musculus (house mouse); mmu00500: Starch and sucrose metabolism - Mus musculus (house mouse); mmu00740: Riboflavin metabolism - Mus musculus (house mouse); mmu00760: Nicotinate and nicotinamide metabolism - Mus musculus (house mouse); mmu00770: Pantothenate and CoA biosynthesis - Mus musculus (house mo…	GO:0000904: cell morphogenesis involved in differentiation; GO:0001503: ossification; GO:0001570: vasculogenesis; GO:0001649: osteoblast differentiation; GO:0001649: osteoblast differentiation; GO:0001822: kidney development; GO:0001922: B-1 B cell homeostasis; GO:0001958: endochondral ossification; GO:0002009: morphogenesis of an epithelium; GO:0002021: response to dietary excess; GO:0002269: le…
ENSMUSG00000085834	Gm15622	136	171	98	2.5289	3.3423	1.7721	1.96538	1.22827e-05	0.000360066	up	13	93761890	93765141	+	lncRNA	predicted gene 15622 [Source:MGI Symbol%3BAcc:MGI:3783067]
ENSMUSG00000021451	Sema4d	155	145	156	0.5495	0.5403	0.5378	1.16289	1.23311e-05	0.000360801	up	13	51839565	51947783	-	protein_coding	sema domain%2C immunoglobulin domain (Ig)%2C transmembrane domain (TM) and short cytoplasmic domain%2C (semaphorin) 4D [Source:MGI Symbol%3BAcc:MGI:109244]	K06521: SEMA4, CD100; semaphorin 4	mmu04360: Axon guidance - Mus musculus (house mouse)	GO:0000122: negative regulation of transcription by RNA polymerase II; GO:0000122: negative regulation of transcription by RNA polymerase II; GO:0000122: negative regulation of transcription by RNA polymerase II; GO:0001755: neural crest cell migration; GO:0001934: positive regulation of protein phosphorylation; GO:0004888: transmembrane signaling receptor activity; GO:0005102: signaling receptor…
ENSMUSG00000036256	Igfbp7	5299	4291	3991	119.319	101.561	87.3902	0.77478	1.2374e-05	0.000361373	false	5	77497087	77555888	-	protein_coding	insulin-like growth factor binding protein 7 [Source:MGI Symbol%3BAcc:MGI:1352480]	K23580: IGFBP7; insulin-like growth factor-binding protein 7		GO:0001558: regulation of cell growth; GO:0005201: extracellular matrix structural constituent; GO:0005520: insulin-like growth factor binding; GO:0005576: extracellular region; GO:0005615: extracellular space; GO:0005615: extracellular space; GO:0005615: extracellular space; GO:0007155: cell adhesion; GO:0009966: regulation of signal transduction; GO:0019838: growth factor binding; GO:0048839: i…
ENSMUSG00000015806	Qdpr	10980	9927	10809	167.177	158.87	160.039	0.74892	1.24904e-05	0.000364082	false	5	45591363	45607578	-	protein_coding	quinoid dihydropteridine reductase [Source:MGI Symbol%3BAcc:MGI:97836]	K00357: QDPR; dihydropteridine reductase [EC:1.5.1.34]	mmu00790: Folate biosynthesis - Mus musculus (house mouse); mmu01100: Metabolic pathways - Mus musculus (house mouse)	GO:0004155: 6,7-dihydropteridine reductase activity; GO:0004155: 6,7-dihydropteridine reductase activity; GO:0005737: cytoplasm; GO:0005737: cytoplasm; GO:0005739: mitochondrion; GO:0005829: cytosol; GO:0006559: L-phenylalanine catabolic process; GO:0006729: tetrahydrobiopterin biosynthetic process; GO:0006729: tetrahydrobiopterin biosynthetic process; GO:0016491: oxidoreductase activity; GO:0042…
ENSMUSG00000013150	Gfod2	288	250	332	1.7015	1.5525	1.9074	-0.90725	1.26717e-05	0.000368168	false	8	106440486	106485296	-	protein_coding	glucose-fructose oxidoreductase domain containing 2 [Source:MGI Symbol%3BAcc:MGI:1917825]			GO:0005576: extracellular region; GO:0016491: oxidoreductase activity; GO:0030198: extracellular matrix organization; GO:0030198: extracellular matrix organization; GO:0031012: extracellular matrix; GO:0031012: extracellular matrix
ENSMUSG00000060548	Tnfrsf19	199	211	119	1.1434	1.2743	0.6649	1.52078	1.26782e-05	0.000368168	up	14	61201324	61283939	-	protein_coding	tumor necrosis factor receptor superfamily%2C member 19 [Source:MGI Symbol%3BAcc:MGI:1352474]	K05155: TNFRSF19, TROY; tumor necrosis factor receptor superfamily member 19	mmu04060: Cytokine-cytokine receptor interaction - Mus musculus (house mouse)	GO:0001942: hair follicle development; GO:0005515: protein binding; GO:0005576: extracellular region; GO:0005886: plasma membrane; GO:0016020: membrane; GO:0016021: integral component of membrane; GO:0038023: signaling receptor activity; GO:0043123: positive regulation of I-kappaB kinase/NF-kappaB signaling; GO:0043123: positive regulation of I-kappaB kinase/NF-kappaB signaling; GO:0046330: posit…
ENSMUSG00000020777	Acox1	104081	77463	78052	557.542	436.166	406.59	-0.80479	1.28824e-05	0.000373074	false	11	116062714	116089871	-	protein_coding	acyl-Coenzyme A oxidase 1%2C palmitoyl [Source:MGI Symbol%3BAcc:MGI:1330812]	K00232: E1.3.3.6, ACOX1, ACOX3; acyl-CoA oxidase [EC:1.3.3.6]	mmu00071: Fatty acid degradation - Mus musculus (house mouse); mmu00410: beta-Alanine metabolism - Mus musculus (house mouse); mmu00592: alpha-Linolenic acid metabolism - Mus musculus (house mouse); mmu00640: Propanoate metabolism - Mus musculus (house mouse); mmu01040: Biosynthesis of unsaturated fatty acids - Mus musculus (house mouse); mmu01100: Metabolic pathways - Mus musculus (house mouse);…	GO:0000038: very long-chain fatty acid metabolic process; GO:0000038: very long-chain fatty acid metabolic process; GO:0003997: acyl-CoA oxidase activity; GO:0003997: acyl-CoA oxidase activity; GO:0003997: acyl-CoA oxidase activity; GO:0005504: fatty acid binding; GO:0005504: fatty acid binding; GO:0005737: cytoplasm; GO:0005739: mitochondrion; GO:0005777: peroxisome; GO:0005777: peroxisome; GO:0…
ENSMUSG00000113630	4930404H11Rik	109	103	183	2.0882	2.0741	3.4093	2.11894	1.28954e-05	0.000373074	up	12	71535059	71602907	+	lncRNA	RIKEN cDNA 4930404H11 gene [Source:MGI Symbol%3BAcc:MGI:1921065]			GO:0003674: molecular_function; GO:0005575: cellular_component; GO:0008150: biological_process
ENSMUSG00000081207	Gm13775	0	0	1	0	0	0.0353	-9.11081	1.3016e-05	0.000375859	down	4	61701360	61719523	+	lncRNA	predicted gene 13775 [Source:MGI Symbol%3BAcc:MGI:3712466]
ENSMUSG00000042510	AA986860	172	93	167	1.2864	0.7311	1.2146	-1.23524	1.30512e-05	0.000376172	down	1	130659713	130672359	+	protein_coding	expressed sequence AA986860 [Source:MGI Symbol%3BAcc:MGI:2138143]			GO:0003674: molecular_function; GO:0005737: cytoplasm; GO:0005737: cytoplasm; GO:0005829: cytosol; GO:0005886: plasma membrane; GO:0008150: biological_process
ENSMUSG00000045868	Gvin1	87	98	66	0.263	0.3114	0.194	-1.5899	1.32053e-05	0.000379904	down	7	105755763	105814533	-	protein_coding	GTPase%2C very large interferon inducible 1 [Source:MGI Symbol%3BAcc:MGI:1921808]			GO:0003674: molecular_function; GO:0005575: cellular_component; GO:0008150: biological_process
ENSMUSG00000035783	Acta2	56	260	69	0.6942	3.3879	0.8318	3.02005	1.33807e-05	0.000384235	up	19	34218490	34232990	-	protein_coding	actin alpha 2%2C smooth muscle%2C aorta [Source:MGI Symbol%3BAcc:MGI:87909]	K12313: ACTA2; actin, aortic smooth muscle	mmu04270: Vascular smooth muscle contraction - Mus musculus (house mouse); mmu04371: Apelin signaling pathway - Mus musculus (house mouse); mmu04926: Relaxin signaling pathway - Mus musculus (house mouse)	GO:0000166: nucleotide binding; GO:0001725: stress fiber; GO:0005515: protein binding; GO:0005524: ATP binding; GO:0005737: cytoplasm; GO:0005737: cytoplasm; GO:0005737: cytoplasm; GO:0005856: cytoskeleton; GO:0005869: dynactin complex; GO:0006936: muscle contraction; GO:0008217: regulation of blood pressure; GO:0014829: vascular associated smooth muscle contraction; GO:0014829: vascular associat…
ENSMUSG00000121106	ENSMUSG00000121106	65	207	91	1.3285	4.4469	1.8086	2.6712	1.3553e-05	0.000388462	up	5	74808372	74818997	+	lncRNA	novel transcript%2C antisense to KO:Lnx1and Lnx1
ENSMUSG00000000359	Rem1	37	44	49	0.4672	0.584	0.6017	2.99522	1.37158e-05	0.000390671	up	2	152468871	152477118	+	protein_coding	rad and gem related GTP binding protein 1 [Source:MGI Symbol%3BAcc:MGI:1097696]	K07847: REM1; Rad and Gem related GTP binding protein 1		GO:0000166: nucleotide binding; GO:0003674: molecular_function; GO:0003924: GTPase activity; GO:0005246: calcium channel regulator activity; GO:0005516: calmodulin binding; GO:0005525: GTP binding; GO:0005886: plasma membrane; GO:0008150: biological_process; GO:1901842: negative regulation of high voltage-gated calcium channel activity
ENSMUSG00000022219	Cideb	883	827	812	16.1547	15.9036	14.4464	0.67559	1.36879e-05	0.000390671	false	14	55991507	55995915	-	protein_coding	cell death-inducing DNA fragmentation factor%2C alpha subunit-like effector B [Source:MGI Symbol%3BAcc:MGI:1270844]	K25914: CIDEB; cell death activator CIDE-B	mmu04979: Cholesterol metabolism - Mus musculus (house mouse)	GO:0005829: cytosol; GO:0006915: apoptotic process; GO:0010942: positive regulation of cell death; GO:0042802: identical protein binding; GO:0042981: regulation of apoptotic process; GO:0048471: perinuclear region of cytoplasm; GO:0090200: positive regulation of release of cytochrome c from mitochondria; GO:0097194: execution phase of apoptosis; GO:0097202: activation of cysteine-type endopeptida…
ENSMUSG00000027217	Tspan18	141	178	132	0.4695	0.6231	0.4275	1.54426	1.3657e-05	0.000390671	up	2	93032105	93164850	-	protein_coding	tetraspanin 18 [Source:MGI Symbol%3BAcc:MGI:1917186]	K17353: TSPAN18; tetraspanin-18		GO:0003674: molecular_function; GO:0005887: integral component of plasma membrane; GO:0016020: membrane; GO:0016021: integral component of membrane
ENSMUSG00000029417	Cxcl9	393	267	326	3.5473	2.5332	2.8615	-0.87061	1.37313e-05	0.000390671	false	5	92469206	92475938	-	protein_coding	chemokine (C-X-C motif) ligand 9 [Source:MGI Symbol%3BAcc:MGI:1352449]	K05416: CXCL9; C-X-C motif chemokine 9	mmu04060: Cytokine-cytokine receptor interaction - Mus musculus (house mouse); mmu04061: Viral protein interaction with cytokine and cytokine receptor - Mus musculus (house mouse); mmu04062: Chemokine signaling pathway - Mus musculus (house mouse); mmu04620: Toll-like receptor signaling pathway - Mus musculus (house mouse)	GO:0005125: cytokine activity; GO:0005576: extracellular region; GO:0005615: extracellular space; GO:0005615: extracellular space; GO:0006935: chemotaxis; GO:0006952: defense response; GO:0006954: inflammatory response; GO:0006955: immune response; GO:0007189: adenylate cyclase-activating G protein-coupled receptor signaling pathway; GO:0008009: chemokine activity; GO:0008009: chemokine activity;…
ENSMUSG00000078672	Mup20	41821	22086	40379	1226.84	681.023	1151.9	-1.22665	1.37916e-05	0.000391666	down	4	61968471	61972395	-	protein_coding	major urinary protein 20 [Source:MGI Symbol%3BAcc:MGI:3651981]			GO:0000772: mating pheromone activity; GO:0005186: pheromone activity; GO:0005549: odorant binding; GO:0005550: pheromone binding; GO:0005576: extracellular region; GO:0005615: extracellular space; GO:0008355: olfactory learning; GO:0036094: small molecule binding; GO:0050769: positive regulation of neurogenesis; GO:0071625: vocalization behavior; GO:2000179: positive regulation of neural precurs…
ENSMUSG00000028607	Cpt2	6702	5359	6957	76.3072	64.1352	77.0282	-0.73161	1.41368e-05	0.000400734	false	4	107761178	107780807	-	protein_coding	carnitine palmitoyltransferase 2 [Source:MGI Symbol%3BAcc:MGI:109176]	K08766: CPT2; carnitine O-palmitoyltransferase 2 [EC:2.3.1.21]	mmu00071: Fatty acid degradation - Mus musculus (house mouse); mmu01212: Fatty acid metabolism - Mus musculus (house mouse); mmu03320: PPAR signaling pathway - Mus musculus (house mouse); mmu04714: Thermogenesis - Mus musculus (house mouse); mmu05415: Diabetic cardiomyopathy - Mus musculus (house mouse)	GO:0001676: long-chain fatty acid metabolic process; GO:0001701: in utero embryonic development; GO:0004095: carnitine O-palmitoyltransferase activity; GO:0004095: carnitine O-palmitoyltransferase activity; GO:0005654: nucleoplasm; GO:0005730: nucleolus; GO:0005739: mitochondrion; GO:0005739: mitochondrion; GO:0005739: mitochondrion; GO:0005743: mitochondrial inner membrane; GO:0006629: lipid met…
ENSMUSG00000013033	Adgrl1	296	254	302	0.9384	0.8464	0.931	1.08495	1.41947e-05	0.000401636	up	8	84626734	84668583	+	protein_coding	adhesion G protein-coupled receptor L1 [Source:MGI Symbol%3BAcc:MGI:1929461]	K04592: ADGRL1, LPHN1; adhesion G protein-coupled receptor L1		GO:0004888: transmembrane signaling receptor activity; GO:0004930: G protein-coupled receptor activity; GO:0004930: G protein-coupled receptor activity; GO:0005886: plasma membrane; GO:0005887: integral component of plasma membrane; GO:0007157: heterophilic cell-cell adhesion via plasma membrane cell adhesion molecules; GO:0007157: heterophilic cell-cell adhesion via plasma membrane cell adhesion…
ENSMUSG00000022469	Rapgef3	221	247	197	0.9495	1.1155	0.8231	1.15143	1.42303e-05	0.000401907	up	15	97642651	97665853	-	protein_coding	Rap guanine nucleotide exchange factor (GEF) 3 [Source:MGI Symbol%3BAcc:MGI:2441741]	K08014: RAPGEF3, EPAC1; Rap guanine nucleotide exchange factor 3	mmu04015: Rap1 signaling pathway - Mus musculus (house mouse); mmu04024: cAMP signaling pathway - Mus musculus (house mouse); mmu04072: Phospholipase D signaling pathway - Mus musculus (house mouse); mmu04261: Adrenergic signaling in cardiomyocytes - Mus musculus (house mouse); mmu04670: Leukocyte transendothelial migration - Mus musculus (house mouse); mmu04720: Long-term potentiation - Mus musc…	GO:0000166: nucleotide binding; GO:0001525: angiogenesis; GO:0001934: positive regulation of protein phosphorylation; GO:0005085: guanyl-nucleotide exchange factor activity; GO:0005085: guanyl-nucleotide exchange factor activity; GO:0005085: guanyl-nucleotide exchange factor activity; GO:0005515: protein binding; GO:0005737: cytoplasm; GO:0005886: plasma membrane; GO:0005886: plasma membrane; GO:…
ENSMUSG00000034855	Cxcl10	114	116	134	1.3781	1.4739	1.5752	-2.30868	1.42664e-05	0.000402193	down	5	92494497	92496748	-	protein_coding	chemokine (C-X-C motif) ligand 10 [Source:MGI Symbol%3BAcc:MGI:1352450]	K12671: CXCL10, IP10; C-X-C motif chemokine 10	mmu04060: Cytokine-cytokine receptor interaction - Mus musculus (house mouse); mmu04061: Viral protein interaction with cytokine and cytokine receptor - Mus musculus (house mouse); mmu04062: Chemokine signaling pathway - Mus musculus (house mouse); mmu04620: Toll-like receptor signaling pathway - Mus musculus (house mouse); mmu04622: RIG-I-like receptor signaling pathway - Mus musculus (house mou…	GO:0002690: positive regulation of leukocyte chemotaxis; GO:0005125: cytokine activity; GO:0005576: extracellular region; GO:0005615: extracellular space; GO:0005615: extracellular space; GO:0005615: extracellular space; GO:0006935: chemotaxis; GO:0006952: defense response; GO:0006954: inflammatory response; GO:0006955: immune response; GO:0007186: G protein-coupled receptor signaling pathway; GO…
ENSMUSG00000034126	Pomt2	736	594	707	2.519	2.1369	2.3531	-0.72314	1.4408e-05	0.000405445	false	12	87153635	87194742	-	protein_coding	protein-O-mannosyltransferase 2 [Source:MGI Symbol%3BAcc:MGI:2444430]	K00728: POMT, pmt; dolichyl-phosphate-mannose-protein mannosyltransferase [EC:2.4.1.109]	mmu00514: Other types of O-glycan biosynthesis - Mus musculus (house mouse); mmu00515: Mannose type O-glycan biosynthesis - Mus musculus (house mouse); mmu01100: Metabolic pathways - Mus musculus (house mouse)	GO:0000030: mannosyltransferase activity; GO:0004169: dolichyl-phosphate-mannose-protein mannosyltransferase activity; GO:0005654: nucleoplasm; GO:0005730: nucleolus; GO:0005783: endoplasmic reticulum; GO:0005789: endoplasmic reticulum membrane; GO:0005829: cytosol; GO:0006493: protein O-linked glycosylation; GO:0016020: membrane; GO:0016021: integral component of membrane; GO:0016740: transferas…
ENSMUSG00000022371	Col14a1	3265	2695	1845	12.6742	10.9963	6.9647	1.16606	1.53088e-05	0.00042993	up	15	55171146	55384199	+	protein_coding	collagen%2C type XIV%2C alpha 1 [Source:MGI Symbol%3BAcc:MGI:1341272]	K08133: COL14A; collagen type XIV alpha	mmu04974: Protein digestion and absorption - Mus musculus (house mouse)	GO:0003229: ventricular cardiac muscle tissue development; GO:0005576: extracellular region; GO:0005581: collagen trimer; GO:0005614: interstitial matrix; GO:0005614: interstitial matrix; GO:0005615: extracellular space; GO:0005615: extracellular space; GO:0007155: cell adhesion; GO:0030020: extracellular matrix structural constituent conferring tensile strength; GO:0030199: collagen fibril organ…
ENSMUSG00000031545	Gpat4	5446	4344	4982	22.1877	18.6027	19.7381	-0.93377	1.53338e-05	0.00042993	false	8	23661281	23698362	-	protein_coding	glycerol-3-phosphate acyltransferase 4 [Source:MGI Symbol%3BAcc:MGI:2142716]	K13506: GPAT3_4, AGPAT9, AGPAT6; glycerol-3-phosphate O-acyltransferase 3/4 [EC:2.3.1.15]	mmu00561: Glycerolipid metabolism - Mus musculus (house mouse); mmu00564: Glycerophospholipid metabolism - Mus musculus (house mouse); mmu01100: Metabolic pathways - Mus musculus (house mouse)	GO:0002071: glandular epithelial cell maturation; GO:0004366: glycerol-3-phosphate O-acyltransferase activity; GO:0004366: glycerol-3-phosphate O-acyltransferase activity; GO:0004366: glycerol-3-phosphate O-acyltransferase activity; GO:0005515: protein binding; GO:0005783: endoplasmic reticulum; GO:0005783: endoplasmic reticulum; GO:0006629: lipid metabolic process; GO:0006631: fatty acid metabol…
ENSMUSG00000015176	Nolc1	1122	912	1168	7.6919	6.5718	7.7866	-0.73988	1.54132e-05	0.000431374	false	19	46064302	46073969	+	protein_coding	nucleolar and coiled-body phosphoprotein 1 [Source:MGI Symbol%3BAcc:MGI:1918019]	K25818: NOLC1; nucleolar and coiled-body phosphoprotein 1		GO:0001093: TFIIB-class transcription factor binding; GO:0001650: fibrillar center; GO:0005515: protein binding; GO:0005634: nucleus; GO:0005654: nucleoplasm; GO:0005654: nucleoplasm; GO:0005654: nucleoplasm; GO:0005730: nucleolus; GO:0005730: nucleolus; GO:0005730: nucleolus; GO:0005737: cytoplasm; GO:0006417: regulation of translation; GO:0007000: nucleolus organization; GO:0008139: nuclear loc…
ENSMUSG00000046985	Tapt1	1794	1420	1374	10.9923	9.1454	8.1869	-0.73178	1.56435e-05	0.000437027	false	5	44332496	44383968	-	protein_coding	transmembrane anterior posterior transformation 1 [Source:MGI Symbol%3BAcc:MGI:2683537]	K23404: TAPT1; transmembrane anterior posterior transformation protein 1		GO:0001503: ossification; GO:0003674: molecular_function; GO:0005654: nucleoplasm; GO:0005737: cytoplasm; GO:0005813: centrosome; GO:0005829: cytosol; GO:0005856: cytoskeleton; GO:0005929: cilium; GO:0007275: multicellular organism development; GO:0016020: membrane; GO:0016021: integral component of membrane; GO:0030030: cell projection organization; GO:0030154: cell differentiation; GO:0030176: …
ENSMUSG00000006378	Gcat	496	353	614	5.6639	4.237	6.8182	1.11216	1.56807e-05	0.000437277	up	15	78915074	78922553	+	protein_coding	glycine C-acetyltransferase (2-amino-3-ketobutyrate-coenzyme A ligase) [Source:MGI Symbol%3BAcc:MGI:1349389]	K00639: kbl, GCAT; glycine C-acetyltransferase [EC:2.3.1.29]	mmu00260: Glycine, serine and threonine metabolism - Mus musculus (house mouse); mmu01100: Metabolic pathways - Mus musculus (house mouse)	GO:0003674: molecular_function; GO:0003824: catalytic activity; GO:0005634: nucleus; GO:0005654: nucleoplasm; GO:0005739: mitochondrion; GO:0005739: mitochondrion; GO:0005739: mitochondrion; GO:0005743: mitochondrial inner membrane; GO:0006567: threonine catabolic process; GO:0008150: biological_process; GO:0008890: glycine C-acetyltransferase activity; GO:0009058: biosynthetic process; GO:001660…
ENSMUSG00000025089	Gfra1	7049	5349	5443	35.0433	27.9513	26.3137	-0.98148	1.57496e-05	0.000437617	false	19	58224036	58444341	-	protein_coding	glial cell line derived neurotrophic factor family receptor alpha 1 [Source:MGI Symbol%3BAcc:MGI:1100842]	K19895: GFRA; GDNF family receptor alpha		GO:0005030: neurotrophin receptor activity; GO:0005178: integrin binding; GO:0005615: extracellular space; GO:0005768: endosome; GO:0005794: Golgi apparatus; GO:0005886: plasma membrane; GO:0007169: transmembrane receptor protein tyrosine kinase signaling pathway; GO:0007399: nervous system development; GO:0007399: nervous system development; GO:0009653: anatomical structure morphogenesis; GO:000…
ENSMUSG00000030545	Pex11a	2901	1666	2759	24.8192	14.9819	22.954	-1.33716	1.5746e-05	0.000437617	down	7	79385705	79392879	-	protein_coding	peroxisomal biogenesis factor 11 alpha [Source:MGI Symbol%3BAcc:MGI:1338788]	K13351: PEX11A; peroxin-11A	mmu04146: Peroxisome - Mus musculus (house mouse)	GO:0005777: peroxisome; GO:0005778: peroxisomal membrane; GO:0005778: peroxisomal membrane; GO:0005779: integral component of peroxisomal membrane; GO:0007031: peroxisome organization; GO:0007165: signal transduction; GO:0016020: membrane; GO:0016021: integral component of membrane; GO:0016557: peroxisome membrane biogenesis; GO:0016559: peroxisome fission; GO:0016559: peroxisome fission; GO:0032…
ENSMUSG00000019942	Cdk1	133	260	123	0.7338	1.5079	0.66	1.76509	1.58443e-05	0.000438673	up	10	69170976	69188768	-	protein_coding	cyclin-dependent kinase 1 [Source:MGI Symbol%3BAcc:MGI:88351]	K02087: CDK1, CDC2; cyclin-dependent kinase 1 [EC:2.7.11.22 2.7.11.23]	mmu04110: Cell cycle - Mus musculus (house mouse); mmu04114: Oocyte meiosis - Mus musculus (house mouse); mmu04115: p53 signaling pathway - Mus musculus (house mouse); mmu04218: Cellular senescence - Mus musculus (house mouse); mmu04540: Gap junction - Mus musculus (house mouse); mmu04914: Progesterone-mediated oocyte maturation - Mus musculus (house mouse); mmu05170: Human immunodeficiency virus…	GO:0000086: G2/M transition of mitotic cell cycle; GO:0000166: nucleotide binding; GO:0000307: cyclin-dependent protein kinase holoenzyme complex; GO:0003682: chromatin binding; GO:0004672: protein kinase activity; GO:0004674: protein serine/threonine kinase activity; GO:0004693: cyclin-dependent protein serine/threonine kinase activity; GO:0004693: cyclin-dependent protein serine/threonine kinas…
ENSMUSG00000031799	Tpm4	1091	1234	1140	6.9573	8.2714	7.0695	0.96701	1.58346e-05	0.000438673	false	8	72884018	72906986	+	protein_coding	tropomyosin 4 [Source:MGI Symbol%3BAcc:MGI:2449202]	K10375: TPM4; tropomyosin 4	mmu04260: Cardiac muscle contraction - Mus musculus (house mouse); mmu04261: Adrenergic signaling in cardiomyocytes - Mus musculus (house mouse); mmu05410: Hypertrophic cardiomyopathy - Mus musculus (house mouse); mmu05414: Dilated cardiomyopathy - Mus musculus (house mouse)	GO:0001725: stress fiber; GO:0002102: podosome; GO:0003779: actin binding; GO:0005737: cytoplasm; GO:0005856: cytoskeleton; GO:0005884: actin filament; GO:0006936: muscle contraction; GO:0007015: actin filament organization; GO:0015629: actin cytoskeleton; GO:0030863: cortical cytoskeleton; GO:0042802: identical protein binding; GO:0042803: protein homodimerization activity; GO:0046872: metal ion…
ENSMUSG00000000093	Tbx2	335	330	365	2.5151	2.6042	2.6648	0.94255	1.61304e-05	0.000445794	false	11	85723377	85732774	+	protein_coding	T-box 2 [Source:MGI Symbol%3BAcc:MGI:98494]	K10176: TBX2; T-box protein 2		GO:0000122: negative regulation of transcription by RNA polymerase II; GO:0000122: negative regulation of transcription by RNA polymerase II; GO:0000122: negative regulation of transcription by RNA polymerase II; GO:0000122: negative regulation of transcription by RNA polymerase II; GO:0000978: RNA polymerase II cis-regulatory region sequence-specific DNA binding; GO:0000978: RNA polymerase II ci…	T-box
ENSMUSG00000023132	Gzma	176	41	178	4.7627	1.1662	4.6841	2.39496	1.68135e-05	0.000462191	up	13	113230359	113237515	-	protein_coding	granzyme A [Source:MGI Symbol%3BAcc:MGI:109266]	K01352: GZMA; granzyme A [EC:3.4.21.78]	mmu04080: Neuroactive ligand-receptor interaction - Mus musculus (house mouse)	GO:0004252: serine-type endopeptidase activity; GO:0005576: extracellular region; GO:0005634: nucleus; GO:0006508: proteolysis; GO:0008233: peptidase activity; GO:0008236: serine-type peptidase activity; GO:0009617: response to bacterium; GO:0016787: hydrolase activity; GO:0019835: cytolysis; GO:0032078: negative regulation of endodeoxyribonuclease activity; GO:0042803: protein homodimerization a…
ENSMUSG00000042719	Naa25	516	510	440	1.6928	1.7587	1.4037	-0.70574	1.68056e-05	0.000462191	false	5	121535999	121582441	+	protein_coding	N(alpha)-acetyltransferase 25%2C NatB auxiliary subunit [Source:MGI Symbol%3BAcc:MGI:2442563]	K17973: NAA25, MDM20; N-terminal acetyltransferase B complex non-catalytic subunit		GO:0004596: peptide alpha-N-acetyltransferase activity; GO:0005737: cytoplasm; GO:0005737: cytoplasm; GO:0005794: Golgi apparatus; GO:0005829: cytosol; GO:0017196: N-terminal peptidyl-methionine acetylation; GO:0031416: NatB complex
ENSMUSG00000121242	ENSMUSG00000121242	31	47	34	0.7098	1.1311	0.757	-1.88396	1.67592e-05	0.000462191	down	1	71975569	71977777	-	lncRNA	novel transcript
ENSMUSG00000121179	ENSMUSG00000121179	91	82	104	0.8009	0.7586	0.8901	1.99619	1.72982e-05	0.000474672	up	6	30782687	30785779	+	lncRNA	novel transcript%2C antisense to Copg2
[truncated: 19,570 more rows]
