# Supplementary material for: KDM5B drives acute liver injury by impairing autophagy and activating cGAS-STING signaling via binding to ATG16L1
Source: Research Square preprint supplement (doi:10.21203/rs.3.rs-7430149/v1), 2025-09-12
Supplement: Supplementary file 2 [file e488b053d0b345dfab9324d5.docx]

**Table S1**. Primer sets used for qRT-PCR analysis.

| Gene | Forward Primer (5' to 3') | Reverse Primer (5' to 3') |
| --- | --- | --- |
| *LC3* | AGCTTCGCCGACCGCTGTAA | ATCCGTCTTCATCCTTCTCCTGTTC |
| *Beclin-1* | CCAATAAGATGGGTCTGAAGTT | ATCCGTCTTCATCCTTCTCCTGTTC |
| *TNF-α* | AGTTCCCAAATGGCCTCCCTC | GGGCTACAGGCTTGTCACTCG |
| *IL-1β* | TCAAATCTCGCAGCAGCACAT | TCATCTCGGAGCCTGTAGTGC |
| *IL-6* | ACAACCACGGCCTTCCCTAC | CTTTTCTCATTTCCACGATTTCCC |
| *IL-18* | TTTATTGACAACACGCTTTAC | CTTTTGTCAACGAAGAGAACT |
| *GAPDH* | CTCATGCGCTGTGTGGAA | GAAAATGGGAAACTGGCT |
| *CXCL10* | ATCATCCCTGCGAGCCTATCCT | GACCTTTTTTGGCTAAACGCTTTC |
| *ISG15* | CATCCTGGTGAGGAACGAAAGG | CTCAGCCAGAACTGGTCTTCGT |
| *TFN-β* | GCCTTTGCCATCCAAGAGATGC | ACACTGTCTGCTGGTGGAGTTC |
| *KDM5B* | ATTGGGAGTGATTGATTCGG | GCGTGTACCTATACCGCAAT |
| *p62/SQSTM1* | GCTCTTCGGAAGTCAGCAAACC | GCAGTTTCCCGACTCCATCTGT |
