# Supplementary material for: KDM5B drives acute liver injury by impairing autophagy and activating cGAS-STING signaling via binding to ATG16L1
Source: Research Square preprint supplement (doi:10.21203/rs.3.rs-7430149/v1), 2025-09-12
Supplement: Supplementary file 3 [file fd71f70d8732a3bfc5b1c9a6.docx]

**Table S2. Primary antibodies used in the study.**

| Antibody | MV (KDa) | Sources (Catalogue #) | Dilution |
| --- | --- | --- | --- |
| KDM5B | 176 | ABclonal (A7772) (China) | WB: 1:1000; IF: 1:200; IHC: 1:250 |
| F4/80 | - | Cell Signaling Technology (70076) (USA) | IHC: 1:250 |
| LC3B | 14,16 | Proteintech (18725-1-AP) (China) | WB: 1:1000; IF: 1:200 |
| Beclin-1 | 60 | Proteintech (11306-1-AP) (China) | WB: 1:2000 |
| p62/SQSTM1 | 62 | Cell Signaling Technology (8025) (USA) | WB: 1:1000 |
| GAPDH | 36 | Proteintech (60004-1-Ig) (China) | WB: 1:1000 |
| ATG16L1 | 68 | Cell Signaling Technology (8089) (USA) | WB: 1:1000; IF: 1:200 |
| ATG12-ATG5 | 55 | Biocompare (CPBT-66438RA) (USA) | WB: 1:1000 |
| CGAS | 58 | Abmart (PQA3430) (China) | WB: 1:1000; IF: 1:200 |
| p-STING(Ser366) | 42 | Abmart (TA7416) (China) | WB: 1:1000; IF: 1:200 |
| STING | 42 | Abmart (TD12090) (China) | WB: 1:1000; IF: 1:200 |
| p-TBK1(S172) | 84 | Abmart (T58364) (China) | WB: 1:1000; IF: 1:200 |
| TBK1 | 84 | Abmart (T55145) (China) | WB: 1:1000; IF: 1:200 |
| p-IRF3(Ser396) | 57 | Abmart (TA2436) (China) | WB: 1:1000; IF: 1:200 |
| IRF3 | 57 | Abmart (T55779) (China) | WB: 1:1000; IF: 1:200 |
| p-NF-κB | 65 | Cell Signaling Technology (3033) (USA) | WB: 1:1000 |
| p65 | 65 | Cell Signaling Technology (8242) (USA) | WB: 1:1000 |
